# Supplementary material for: Prevention and management of foot and lower limb health complications in adults undergoing dialysis: a scoping review
Source: J Foot Ankle Res. 2023 Nov 20;16:81. doi: 10.1186/s13047-023-00679-z (PMC10659051; doi:10.1186/s13047-023-00679-z)
Supplement: Supplementary file 1 — Additional file 1. Search strategies. [file 13047_2023_679_MOESM1_ESM.xls]

## Sheet: Search strategy
Prevention and management of foot and lower limb health complications in adults undergoing dialysis: a scoping review
Sarah M Manewell (1), Purnima Rao, Keren Haneman, Minjia Zheng, Hady Charaf, Professor Hylton B Menz, Professor Cathie Sherrington, Dr Serene S Paul
(1) School of Health Sciences, Faculty of Medicine and Health, The University of Sydney, NSW, Australia; Podiatry Department, Sydney Local Health District, NSW Health, Australia
sman0630@uni.sydney.edu.au
APPENDIX 1. SEARCH STRATEGIES
MEDLINE		Embase		CINAHL		AMED
1	Kidney Failure, Chronic/ or chronic kidney failure.mp.	1	chronic kidney failure.mp. or chronic kidney failure/	S1	"chronic kidney failure" OR (MH "Kidney Failure, Chronic+")	1	chronic kidney failure.mp. or Kidney failure chronic/
2	end stage renal disease.mp.	2	end stage renal disease.mp. or end stage renal disease/	S2	"end stage renal disease"	2	end stage renal disease.mp.
3	ESRD.mp.	3	ESRD.mp.	S3	"ESRD"	3	ESRD.mp.
4	end stage kidney disease.mp.	4	end stage kidney disease.mp.	S4	"end stage kidney disease"	4	end stage kidney disease.mp.
5	ESKD.mp.	5	ESKD.mp.	S5	"ESKD"	5	ESKD.mp.
6	end stage renal failure.mp.	6	end stage renal failure.mp.	S6	"end stage renal failure"	6	end stage renal failure.mp.
7	ESRF.mp.	7	ESRF.mp.	S7	"ESRF"	7	ESRF.mp.
8	Chronic kidney disease.mp.	8	chronic kidney disease.mp. or chronic kidney disease/	S8	"chronic kidney disease"	8	chronic kidney disease.mp.
9	CKD.mp.	9	CKD.mp.	S9	"CKD"	9	CKD.mp.
10	Kidney disease.mp. or Kidney Diseases/	10	kidney disease.mp. or kidney disease/	S10	(MH "Kidney Diseases+") OR "kidney disease"	10	Kidney disease/ or kidney disease.mp.
11	DIALYSIS/ or Dialysis.mp.	11	dialysis/ or dialysis.mp.	S11	(MH "Dialysis+") OR "dialysis"	11	dialysis.mp.
12	Renal dialysis.mp. or Renal Dialysis/	12	renal dialysis.mp.	S12	"renal dialysis"	12	Renal dialysis/ or renal dialysis.mp.
13	renal insufficiency.mp. or Renal Insufficiency/	13	renal insufficiency.mp.	S13	(MH "Renal Insufficiency+") OR "renal insufficiency"	13	renal insufficiency.mp.
14	H?emodialysis.mp.	14	h?emodialysis.mp. or hemodialysis/	S14	"h#emodialysis"	14	h?emodialysis.mp. or Hemodialysis/
15	Peritoneal Dialysis.mp. or Peritoneal Dialysis/	15	peritoneal dialysis.mp. or peritoneal dialysis/	S15	(MH "Peritoneal Dialysis+") OR "peritoneal dialysis"	15	peritoneal dialysis.mp.
16	Renal replacement therapy.mp. or Renal Replacement Therapy/	16	renal replacement therapy.mp. or renal replacement therapy/	S16	(MH "Renal Replacement Therapy+") OR "renal replacement therapy"	16	renal replacement therapy.mp.
17	FOOT/ or Foot.mp.	17	Foot.mp. or foot/	S17	(MH "Foot+") OR "foot"	17	Foot/ or foot.mp.
18	Feet.mp.	18	feet.mp.	S18	"feet"	18	feet.mp.
19	Toe?.mp.	19	toe/ or toe*.mp.	S19	(MH "Toes") OR "toe#"	19	Toes/ or toe*.mp.
20	Leg?.mp. or LEG/	20	leg/ or leg*.mp.	S20	(MH "Leg") OR "leg"	20	Leg/ or leg*.mp.
21	Lower Extremity/ or Lower extremit*.mp.	21	lower extremit*.mp.	S21	(MH "Lower Extremity+") OR "lower extremit*"	21	lower extremit*.mp.
22	Lower limb?.mp.	22	lower limb*.mp. or lower limb/	S22	"lower limb"	22	lower limb*.mp.
23	FOOT ULCER/ or ULCER/ or Ulcer*.mp.	23	foot ulcer/ or ulcer*.mp. or ulcer/ or ulcer healing/	S23	(MH "Ulcer") OR (MH "Foot Ulcer+") OR "ulcer*"	23	Ulcer/ or ulcer*.mp. or Foot ulcer/
24	Wound*.mp. or WOUND HEALING/ or WOUND INFECTION/	24	wound infection/ or wound*.mp. or wound/ or wound healing/	S24	(MH "Wound Infection+") OR (MH "Wounds and Injuries+") OR "wound#"	24	Wounds/ or wound*.mp. or Wound healing/
25	Skin/ or Skin.mp. or SKIN ABNORMALITIES/	25	skin.mp. or skin/	S25	(MH "Skin+") OR "skin"	25	Skin/ or skin.mp.
26	Recur*.mp. or RECURRENCE/	26	recur*.mp. or recurrent disease/	S26	(MH "Recurrence") OR "recur*"	26	recur*.mp.
27	Amputation/ or Amputat*.mp.	27	amputat*.mp. or amputation/	S27	(MH "Amputation+") OR "amputat*"	27	Amputation/ or amputat*.mp.
28	Infect*.mp.	28	infect*.mp.	S28	"infect*"	28	infect*.mp.
29	INFECTION/	29	infection/	S29	(MH "Infection+")	29	Infection/
30	Osteomyelitis.mp. or OSTEOMYELITIS/	30	osteomyelitis/ or osteomyelitis.mp.	S30	(MH "Osteomyelitis") OR "osteomyelitis"	30	Osteomyelitis/ or osteomyelitis.mp.
31	Hospital stay.mp.	31	hospital stay.mp.	S31	"hospital stay"	31	hospital stay.mp.
32	Hospitali#ation.mp.	32	hospitali#ation.mp. or hospitalization/	S32	(MH "Hospitalization+") OR "hospitali?ation"	32	Hospitalization/ or hospitali#ation.mp.
33	PATIENT ADMISSION/ or Admission.mp.	33	hospital admission/ or admission.mp.	S33	(MH "Patient Admission") OR "admission"	33	Patient admission/ or admission.mp.
34	Admit*.mp.	34	admit*.mp.	S34	"admit*"	34	admit*.mp.
35	Re?admi*.mp.	35	re*admi*.mp.	S35	(MH "Readmission") OR "re#admi*"	35	(readmi* or re-admi*).mp.
36	Length of stay.mp. or Length of Stay/	36	length of stay.mp. or length of stay/	S36	(MH "Length of Stay") OR "length of stay"	36	"Length of stay"/ or length of stay.mp.
37	Prognosis.mp. or PROGNOSIS/	37	prognosis/ or prognosis.mp.	S37	(MH "Prognosis+") OR "prognosis"	37	prognosis.mp. or Prognosis/
38	Isch?emia.mp. or ISCHEMIA/	38	isch?emia.mp. or ischemia/	S38	(MH "Ischemia+") OR "isch#emia"	38	Ischemia/ or isch?emia.mp.
39	Critical isch?emia.mp.	39	critical isch?emia.mp.	S39	"critical isch#emia"	39	critical isch?emia.mp.
40	Critical limb isch?emia.mp.	40	critical limb isch?emia.mp. or critical limb ischemia/	S40	"critical limb isch#emia"	40	critical limb isch?emia.mp.
41	1 or 2 or 3 or 4 or 5 or 6 or 7 or 8 or 9 or 10 or 11 or 12 or 13 or 14 or 15 or 16	41	1 or 2 or 3 or 4 or 5 or 6 or 7 or 8 or 9 or 10 or 11 or 12 or 13 or 14 or 15 or 16	S41	S1 OR S2 OR S3 OR S4 OR S5 OR S6 OR S7 OR S8 OR S9 OR S10 OR S11 OR S12 OR S13 OR S14 OR S15 OR S16	41	1 or 2 or 3 or 4 or 5 or 6 or 7 or 8 or 9 or 10 or 11 or 12 or 13 or 14 or 15 or 16
42	17 or 18 or 19 or 20 or 21 or 22	42	17 or 18 or 19 or 20 or 21 or 22	S42	S17 OR S18 OR S19 OR S20 OR S21 OR S22	42	17 or 18 or 19 or 20 or 21 or 22
43	23 or 24 or 25 or 26 or 27 or 28 or 29 or 30 or 31 or 32 or 33 or 34 or 35 or 36 or 37 or 38 or 39 or 40	43	23 or 24 or 25 or 26 or 27 or 28 or 29 or 30 or 31 or 32 or 33 or 34 or 35 or 36 or 37 or 38 or 39 or 40	S43	S23 OR S24 OR S25 OR S26 OR S27 OR S28 OR S29 OR S30 OR S31 OR S32 OR S33 OR S34 OR S35 OR S36 OR S37 OR S38 OR S39 OR S40	43	23 or 24 or 25 or 26 or 27 or 28 or 29 or 30 or 31 or 32 or 33 or 34 or 35 or 36 or 37 or 38 or 39 or 40
44	41 and 42 and 43	44	41 and 42 and 43	S44	S41 AND S42 AND S43	44	41 and 42 and 43
