# Supplementary material for: Prevention and management of foot and lower limb health complications in adults undergoing dialysis: a scoping review
Source: J Foot Ankle Res. 2023 Nov 20;16:81. doi: 10.1186/s13047-023-00679-z (PMC10659051; doi:10.1186/s13047-023-00679-z)
Supplement: Supplementary file 2 — Additional file 2. Extracted data. [file 13047_2023_679_MOESM2_ESM.xls]

## Sheet: Extracteddata
Prevention and management of foot and lower limb health complications in adults undergoing dialysis: a scoping review
Sarah M Manewell (1), Purnima Rao, Keren Haneman, Minjia Zheng, Hady Charaf, Professor Hylton B Menz, Professor Cathie Sherrington, Dr Serene S Paul
(1) School of Health Sciences, Faculty of Medicine and Health, The University of Sydney, NSW, Australia; Podiatry Department, Sydney Local Health District, NSW Health, Australia
sman0630@uni.sydney.edu.au
APPENDIX 2. EXTRACTED DATA
Reference	Year_of_publication	Surname_first_author	Study_title	Aim	Country	Setting	Intervention	Intervention_details	Duration	Comparator	Prevention_management	Study_design	Obs_vs_exp	Start_year	End_year	Proportion_ESRD	Participants	Males_percentage	Age_meanormedian	Dialysis_type	Transplant_participants	Diabetes	Results_footulcer	Results_amputation	Results_infection	Results_PAD	Results_hospitaladmission	multiple_publication_same_study	Results_footulcer2	Results_amputation2	Results_infection2	Results_PAD2	Results_hospitaladmission2	Results_taly
Ahn J, Raspovic KM, Liu GT, Lavery LA, La Fontaine J, Nakonezny PA et al. Renal Function as a Predictor of Early Transmetatarsal Amputation Failure. Foot Ankle Spec. 2019;12(5):439-51. doi:10.1177/1938640018816371.	2019	Ahn	Renal Function as a Predictor of Early Transmetatarsal Amputation Failure	To assess the relationship of renal function with Transmetatarsal Amputation (TMA) failure during the 30-day perioperative period using a large population database. , to evaluate renal function as a risk factor for all reoperations, major amputations, readmission, and mortality after TMA	United States of America	Inpatient (hospital) setting (other than dialysis)	Surgery	Transmetatarsal amputation (TMA)	Less than 6 months	No	Prevention and management	Cohort study	Observational	2005	2016	Less than 75% (but 10 or more participants had ESRD and results for this specific group are available)	283	48	63	Haemodialysis and peritoneal dialysis	No	Presence or absence of diabetes not specified		21 (7%) transmetatarsal amputations failed, while 262 (93%) transmetatarsal amputations were successful					0	1	0	0	0	1
Akturk A, van Netten JJ, Scheer R, Vermeer M, van Baal JG. Ulcer-free survival days and ulcer healing in patients with diabetic foot ulcers: A prospective cohort study. Int Wound J. 2019;16(6):1365-72. doi:10.1111/iwj.13199.	2019	Akturk	Ulcer-free survival days and ulcer healing in patients with diabetic foot ulcers: A prospective cohort study	Prospectively investigate ulcer-free survival days and ulcer healing in patients with diabetic foot ulcers	The Netherlands	Outpatient setting (other than dialysis)	Care from one or more health professionals	Patients attended a diabetes foot expertise centre, receiving multidisciplinary care in alignment with Dutch and International Working Group of the Diabetic Foot guidelines	1 year to less than 2 years	No	Prevention and management	Cohort study	Observational	2014	2017	Less than 75% (but 10 or more participants had ESRD and results for this specific group are available)	12	48	63	Not reported	No	Presence or absence of diabetes not specified	6 patients (50%) achieved healing. In the group whose ulcer had healed, the median number of ulcer free survival days was 0 (IQR 0-11).						1	0	0	0	0	1
Ambur V, Park P, Gaughan JP, Golarz S, Schmieder F, Van Bemmelen P et al. The impact of chronic kidney disease on lower extremity bypass outcomes in patients with critical limb ischemia. J Vasc Surg. 2019;69(2):491-6. doi:10.1016/j.jvs.2018.05.229.	2019	Ambur	The impact of chronic kidney disease on lower extremity bypass outcomes in patients with critical limb ischemia	To investigate whether patients with moderate to severe chronic kidney disease have worse outcomes after infrainguinal bypass for CLI.	United States of America	Inpatient (hospital) setting (other than dialysis)	Surgery	Bypass revascularisation	Less than 6 months	No	Management	Cohort study	Observational	2012	2015	Less than 75% (but 10 or more participants had ESRD and results for this specific group are available)	550	63.3	66.4	Haemodialysis	No	Combination of participants with and without diabetes		33 patients (6.0%) required amputation		46 (8.4%) experienced graft failure	135 (24.5%) required readmission		0	1	0	1	1	3
Arhuidese I, Hicks CW, Locham S, Obeid T, Nejim B, Malas MB. Long-term outcomes after autogenous versus synthetic lower extremity bypass in patients on hemodialysis. Surgery. 2017;162(5):1071-9. doi:10.1016/j.surg.2017.04.026.	2017	Arhuidese	Long-term outcomes after autogenous versus synthetic lower extremity bypass in patients on hemodialysis	Evaluate long-term outcomes after open bypass operations in a large contemporary population-based cohort of hemodialysis patients	United States of America	Inpatient (hospital) setting (other than dialysis)	Surgery	Open lower extremity bypass with autogenous versus synthetic conduits	5 years or more	Yes	Management	Cohort study	Observational	2007	2011	Equal to or greater than 75%	9739	61	67	Haemodialysis	Yes	Combination of participants with and without diabetes		Limb loss within 30 days of operation was 8%for bypasses created using both autogenous and prosthetic conduits (P= .91).		Primary patency was 18% for both types of conduits at 5 years(P= .16). Comparing autogenous versus prosthetic conduits, primary-assisted patency was 23% vs20% at 5 years (P= .98), while secondary patency was 30% for both conduits at 5 years (P= .05).			0	1	0	1	0	2
Arhuidese I, Kernodle A, Nejim B, Locham S, Hicks C, Malas MB. Sex-based outcomes of lower extremity bypass surgery in hemodialysis patients. J Vasc Surg. 2018;68(1):153-60. doi:10.1016/j.jvs.2017.10.063.	2018	Arhuidese	Sex-based outcomes of lower extremity bypass surgery in hemodialysis patients	Compare conduit use and surgical outcomes of hemodialysis-dependent men and women after open lower extremity bypass surgery	United States of America	Inpatient (hospital) setting (other than dialysis)	Surgery	Infrainguinal bypass (autogenous vs. prosthetic conduits)	1 year to less than 2 years	Yes	Prevention and management	Cohort study	Observational	2006	2011	Equal to or greater than 75%	9739	61	68	Haemodialysis	No	Combination of participants with and without diabetes		Limb loss within 30 days of surgery was: 7.9% for men, 8.3% for women with autogenous conduits (p 0.64); 7.5% for men, 8.7% for women for prosthetic conduits (p 0.17). , Limb salvage estimates at 5 years were: 34% for men, 36% for women with autogenous conduits (p 0.11); 40% for men, 43% for women with prosthetic conduits (p 0.37).		Acute graft failure was: 14% for men, 15% for women for bypasses constructed with autogenous conduits (p 0.35); 15% for men, 17% for women for prosthetic conduits (p 0.06). , Primary patency estimates at 5 years were: 18% for men, 19% for women with autogenous conduits (p 0.61); 17% for men, 19% for women with prosthetic conduits (p 0.23).			0	1	0	1	0	2
Arhuidese I, Nejim B, Locham S, Malas MB. Infrainguinal bypass surgery outcomes are worse in hemodialysis patients compared with patients with renal transplants. J Vasc Surg. 2019;69(3):850-6. doi:10.1016/j.jvs.2018.05.252.	2019	Arhuidese	Infrainguinal bypass surgery outcomes are worse in hemodialysis patients compared with patients with renal transplants	Compare perioperative and long-term outcomes of infrainguinal bypass surgery in a large population-based cohort of hemodialysis and renal transplant patients	United States of America	Inpatient (hospital) setting (other than dialysis)	Surgery	infrainguinal bypass surgery	1 year to less than 2 years	Yes	Prevention and management	Cohort study	Observational	2007	2011	Equal to or greater than 75%	9739	60.9	68	Haemodialysis	Yes	Combination of participants with and without diabetes		Limb loss within 30 days was 8.1% for bypasses constructed with autogenous vein and 8.0% for bypasses constructed with prosthetic conduits.		Acute graft failure within 30 days was 14.1% for bypasses conducted with autogenous vein and 16.0% for bypasses conducted with prosthetic conduits. Prosthetic graft infection within 30 days was 1.3%. , Primary patency estimates for patients who received autogenous conduits were: 47.8% at 1 year; 28.7% at 3 years; 18.0% at 5 years. , Primary patency estimates for patients who received prosthetic c…			0	1	0	1	0	2
Arneja AS, Tamiji J, Hiebert BM, Tappia PS, Galimova L. Functional Outcomes of Patients with Amputation Receiving Chronic Dialysis for End-Stage Renal Disease. Am J Phys Med Rehabil. 2015;94(4):257-68. doi:10.1097/PHM.0000000000000259.	2015	Arneja	Functional outcomes of patients with amputation receiving chronic dialysis for end-stage renal disease	Compare the rehabilitation length of stay and functional outcome of patients with amputation on chronic dialysis with a similar group of patients not on dialysis	Canada	Rehabilitation unit	Rehabilitation	All inpatients received 3-4 hours of physiotherapy and occupational therapy sessions daily	1 year to less than 2 years	Yes	Management	Case control study	Observational	1999	2001	Less than 75% (but 10 or more participants had ESRD and results for this specific group are available)	25	56	54	Haemodialysis and peritoneal dialysis	Yes	All had diabetes		Average functional independence measure scores at discharge were 107.5 and follow up were 104.4. Average acute hospital length of stay was 48 days, while average rehabilitation LOS was 105 days. 22 patients (88%) were fitted with a prosthesis, 5 (20%) could walk indoors and outdoors on follow up, 13 (52%) could ambulate in a household on follow up					0	1	0	0	0	1
Attinger CE, Ducic I, Neville RF, Abbruzzese MR, Gomes M, Sidawy AN. The Relative Roles of Aggressive Wound Care versus Revascularization in Salvage of the Threatened Lower Extremity in the Renal Failure Diabetic Patient. Plast Reconst Surg. 2002;109(4):1281-90. doi:10.1097/00006534-200204010-00011.	2002	Attinger	The relative roles of aggressive wound care versus revascularisation in salvage of the threatened lower extremity in the renal failure diabetic patient	Investigate limb salvage in renal failure diabetic patients who present with ulcerated or gangrenous lower extremities and consider whether immediate amputation is warranted	United States of America	Inpatient (hospital) setting (other than dialysis)	Surgery	All soft-tissue reconstructions and wound care were performed by the plastic surgeon, whereas three vascular surgeons performed the vascular bypasses.	2 years to less than 5 years	Yes	Prevention and management	Cohort study	Observational	1990	1998	Less than 75% (but 10 or more participants had ESRD and results for this specific group are available)	15	67	54	Not reported	Yes	All had diabetes	26 out of 31 (84%) wounds healed. The average time for all wounds to heal was 72 days. Comparing the revascularized limbs versus the adequately vascularised limbs respectively, there was no significant difference in the percentage of wounds healed (87% versus 81%, p 0.56) or the number of days it took wounds to heal (69 days versus 84 days, p 0.41). Wound recurrence rate was 6 out of 31 (19%)	5 major amputations occurred and 21 minor amputations occurred.					1	1	0	0	0	2
Aulivola B, Gargiulo M, Bessoni M, Rumolo A, Stella A. Infrapopliteal Angioplasty for Limb Salvage in the Setting of Renal Failure: Do Results Justify Its Use? Ann Vasc Surg. 2005;19(6):762-8. doi:10.1007/s10016-005-7970-6.	2005	Aulivola	Infrapopliteal Angioplasty for Limb Salvage in the Setting of Renal Failure: Do Results Justify Its Use?	Determine: whether the outcomes associated with tibial angioplasty, when offered as a first-line therapy for critical limb ischemia, differ significantly between patients with and without ESRD; whether tibial angioplasty, when performed for short stenoses or occlusions, offers a reasonable alternative to primary amputation in patients who may not be candidates for surgical revascularisation.	Not reported	Inpatient (hospital) setting (other than dialysis)	Surgery	Angioplasty revascularisation	1 year to less than 2 years	Yes	Prevention and management	Cohort study	Observational	2000	2003	Less than 75% (but 10 or more participants had ESRD and results for this specific group are available)	16	48	62.3	Not reported	No	Presence or absence of diabetes not specified	Ulcer healing occurred after initial angioplasty in four (25%) ESRD limbs.	Major amputation was required in seven (43.7%) ESRD limbs. Limb salvage was 52.5% and 52.5% in those with ESRD at 1 and 3 years, respectively.,		There was subsequent requirement for 4 (25%) redo angioplaty's and 2 (13%) bypasses.			1	1	0	1	0	3
Baele HR, Piotrowski JJ, Yuhas J, Anderson C, Alexander JJ. Infrainguinal bypass in patients with end-stage renal disease. Surgery. 1995;117(3):319-24. doi:10.1016/S0039-6060(05)80208-9.	1995	Baele	Infrainguinal bypass in patients with end-stage renal disease	Evaluate the outcome of infrainguinal arterial reconstruction in a high-risk subset of patients with end-stage renal disease	United States of America	Inpatient (hospital) setting (other than dialysis)	Surgery	Infrainguinal bypass revascularisation	2 years to less than 5 years	No	Prevention and management	Cohort study	Observational	1986	1992	Equal to or greater than 75%	44	50	63	Haemodialysis and peritoneal dialysis	No	Combination of participants with and without diabetes		4% of patients had postoperative major amputation. Expected minor amputations were performed on 13 limbs during the postoperative period, with subsequent healing. Late major amputation was performed for 16 (28%), 13 of which were associated with graft failure. Limb salvage rates at 1 and 2 years were 70% and 52% respectively.		9% of patients had post operative graft thrombosis and 19% had surgical wound breakdown or infection. Primary graft patency rates at 1 and 2 years were 71% and 63% respectively. Secondary patency rate was at 1 and 2 years was 80% and 66% respectively.			0	1	0	1	0	2
Baer-Bositis HEMD, Hicks TDMD, Haidar GMMD, Sideman MJMD, Pounds LLMD, Davies MGMDPMBAP. Outcomes of Isolated Tibial Endovascular Intervention for Rest Pain in Patients on Dialysis. Ann Vasc Surg. 2018;46:118-26. doi:10.1016/j.avsg.2017.04.006.	2018	Baer-Bositis	Outcomes of Isolated Tibial Endovascular Intervention for Rest Pain in Patients on Dialysis	Examine impact of ESRD on the patient-centered outcomes following tibial endovascular intervention for rest pain	United States of America	Inpatient (hospital) setting (other than dialysis)	Surgery	Isolated primary lower extremity tibial endovascular intervention	5 years or more	No	Prevention and management	Cohort study	Observational	2006	2016	Less than 75% (but 10 or more participants had ESRD and results for this specific group are available)	171	57	61	Haemodialysis and peritoneal dialysis	No	Combination of participants with and without diabetes		3% of patients underwent major amputation within 30 days. , 1-year amputation free survival was 85%. , 1-year freedom from major adverse limb event (above ankle amputation of the index limb or major, reintervention: new bypass graft, jump/interposition, graft revision) was 79%. , 5-year limb salvage rate was 45%.		57% of patients demonstrated a significant rise in their ABI/TBI of >0.15. , 3-month rest pain symptoms were: resolved for 39%; improved for 31%; no change for 23%; deteriorated for 7%. , 5-year: primary patency was 32%; assisted primary patency was 42%; secondary patency was 49%.			0	1	0	1	0	2
Benhamou Y, Edet S, Begarin L, Cailleux N, Hanoy M, Bessin C et al. Transcutaneous oxymetry as predictive test of peripheral vascular revascularization in haemodialysis population. Nephrol Dial Transplant. 2012;27(5):2066-9. doi:10.1093/ndt/gfr564.	2012	Benhamou	Transcutaneous oxymetry as predictive test of peripheral vascular revascularization in haemodialysis population	Assess the accuracy of the transcutaneous oxymetry (TcPO2) measurements to screen peripheral arterial disease and to predict vascular outcomes in the haemodialysis population	France	Dialysis unit	Screening by a health professional	Transcutaneous oxymetry assessment at 0, 6 and 12 months after starting maintenance haemodialysis	1 year to less than 2 years	No	Prevention	Cohort study	Observational	2007	2008	Equal to or greater than 75%	48	55	66	Haemodialysis	No	Combination of participants with and without diabetes		Revascularization (n=6) or amputation (n=5) were required for 5 patients. TcPO2 was pathologic in all patients and legs requiring a vascular treatment (revascularization or amputation). , The sensitivity, specificity, positive predictive value and negative predictive value were 100%, 85.2%, 38% and 100% respectively.		Revascularization (n=6) or amputation (n=5) were required for 5 patients. TcPO2 was pathologic in all patients and legs requiring a vascular treatment (revascularization or amputation). , The sensitivity, specificity, positive predictive value and negative predictive value were 100%, 85.2%, 38% and 100% respectively.			0	1	0	1	0	2
Biancari F, Kantonen I, Mätzke S, Albaäck A, Roth W-D, Edgren J et al. Infrainguinal Endovascular and Bypass Surgery for Critical Leg Ischemia in Patients on Long-term Dialysis. Ann Vasc Surg. 2002;16(2):210-4. doi:10.1007/s10016-001-0161-1.	2002	Biancari	Infrainguinal Endovascular and Bypass Surgery for Critical Leg Ischemia in Patients on Long-term Dialysis	Evaluate the results of a series of 21 consecutive patients on long-term dialysis who underwent 20 infrainguinal bypass graft and 5 endovascular procedures for critical leg ischemia to identify factors contraindicating any infrainguinal revascularization attempt in this patient population	Finland	Inpatient (hospital) setting (other than dialysis)	Surgery	Infrainguinal bypass or endovascular procedure	2 years to less than 5 years	No	Prevention and management	Cohort study	Observational	1991	1997	Equal to or greater than 75%	21	47.6	56	Haemodialysis and peritoneal dialysis	No	Combination of participants with and without diabetes		At 1-month, 1-year, and 2-year follow-up, leg salvage rates were 92%, 85%, and 85%, respectively.,		Occlusion of the graft during the 30-day postoperative period occurred in three cases. Three patients had wound edge necrosis and two experienced deep wound infection. , At 1-month, 1-year, and 2-year follow-up, patency rates were 96%, 74%, and 74%, respectively. Arterial bypass surgery and endovascular procedure achieved similar results.			0	1	0	1	0	2
Bianchini Massoni C, Freyrie A, Muccini N, Gargiulo M, Faggioli G, Stella A. Endovascular Treatment of the Infrapopliteal Arteries in Hemodialysis Patients with Critical Limb Ischemia: Is it Justified? Ann Vasc Surg. 2014;28(1):152-8. doi:10.1016/j.avsg.2012.12.005.	2014	Bianchini Massoni	Endovascular Treatment of the Infrapopliteal Arteries in Hemodialysis Patients with Critical Limb Ischemia: Is it Justified?	Evaluate the feasibility and clinical efficacy of endovascular treatment of the infrapopliteal arteries (IPA) in hemodialysis patients with critical limb ischemia (CLI)	Italy	Inpatient (hospital) setting (other than dialysis)	Surgery	Endovascular Treatment of the Infrapopliteal Arteries	6 months to less than 1 year	No	Prevention and management	Cohort study	Observational	2005	2010	Equal to or greater than 75%	39	74.4	70.6	Haemodialysis	No	Combination of participants with and without diabetes		Limb salvage at 1, 6, 12, and 24 months was 85.5%, 72.5%, 72.5%, and 72.5%, respectively. , Ten (22.2%) major amputations were necessary; among these, 6 (60%) occurred within 3 months post procedure. , Multiple infrapopliteal artery treatment was a positive prognostic factor for limb salvage (P=0.042). Limbs with only 1 postoperative patent tibial axis had lower limb salvage compared to patients …		Technical failure occurred in 10 (11%) target arteries., Technical success was obtained in 81 (89%) target arteries. , Associated femoropoplieal endovascular treatment was necessary in 23 (51.1%) treated lower limbs. , Primary patency at 1, 6, 12, and 24 months was 85%, 76.9%, 70.8%, and 62.5%, respectively. , Target vessel assisted patency at 1, 6, 12, and 24 months was 85%, 76.9%, 73.9%, and 73…			0	1	0	1	0	2
Biedunkiewicz B, Tylicki L, Nieweglowski T, Burakowski S, Rutkowski B. Clinical efficacy of ozonated autohemotherapy in hemodialyzed patients with intermittent claudication: an oxygen-controlled study. Int J Artif Organs. 2004;27(1):29-34. doi:10.1177/039139880402700107.	2004	Biedunkiewicz	Clinical efficacy of ozonated autohemotherapy in hemodialyzed patients with intermittent claudication: An oxygen-controlled study	Evaluate the influence of ozonated autohemotherapy on walking ability and the subjective clinical experience of hemodialyzed patients with peripheral arterial disease	Poland	Dialysis unit	Other	ozonated autohemotherapy (O3-AHT)	Not reported	No	Management	Case series	Observational	Not reported	Not reported	Equal to or greater than 75%	10	90	62.7	Haemodialysis	No	Combination of participants with and without diabetes				Significant prolongation in maximum walking distance was observed after ozonated autohemotherapy as compared to the baseline (average by 30.5%) and to the oxygen control (average by 22.7%) (p<0.01 and p<0.03 respectively). , There was also a significant increase in pain free distance after ozonated autohemotherapy as compared to the baseline (average by 71.7%) and to the placebo (average by 62.8%…			0	0	0	1	0	1
Blume P, Salonga C, Garbalosa J, Pierre-Paul D, Key J, Gahtan V et al. Predictors for the Healing of Transmetatarsal Amputations: Retrospective Study of 91 Amputations. Vascular. 2007;15(3):126-33. doi:10.2310/6670.2007.00035.	2007	Blume	Predictors for the Healing of Transmetatarsal Amputations: Retrospective Study of 91 Amputations	Review consecutive patients who underwent transmetatarsal amputation	United States of America	Inpatient (hospital) setting (other than dialysis)	Surgery	transmetatarsal amputations (TMAs)	1 year to less than 2 years	No	Management	Cohort study	Observational	1995	2003	Less than 75% (but 10 or more participants had ESRD and results for this specific group are available)		48	63	Not reported	No	Presence or absence of diabetes not specified		Sixty-two TMAs healed initially, whereas 29 TMAs did not heal by 3 months. At the final examination, 63 of 91 (69%) limbs were healed. Of the 28 limbs that did not heal, 25 of 28 (89%) required further proximal amputation.					0	1	0	0	0	1
Boufi M, Ghaffari P, Allaire E, Fessi H, Ronco P, Vayssairat M. Foot Gangrene in Patients with End-Stage Renal Disease: A Case Control Study. Angiology. 2006;57(3):355-61. doi:10.1177/000331970605700312.	2006	Boufi	Foot Gangrene in Patients with End-Stage Renal Disease: A Case Control Study	Compare survival, limb salvage, and quality of life in a group of patients hospitalized for foot gangrene according to their renal status (ESRD versus no renal insufficiency)	France	Inpatient (hospital) setting (other than dialysis)	Other	Hospital admission for foot gangrene	1 year to less than 2 years	Yes	Prevention and management	Case control study	Observational	1996	2002	Less than 75% (but 10 or more participants had ESRD and results for this specific group are available)	16	75	68.7	Not reported	No	Combination of participants with and without diabetes		56% experienced minor amputation while 31% experienced major amputation. , At the end of follow up, 1 patient could walk normally (results impacted by high mortality rate)		31% of ESRD patients (5/16) had surgical bypass revascularization. No endovascular revascularization was performed. ,			0	1	0	1	0	2
Brosi P, Baumgartner I, Silvestro A, Do D-D, Mahler F, Triller J et al. Below-the-Knee Angioplasty in Patients with End-Stage Renal Disease. J Endovasc Ther. 2005;12(6):704-13. doi:10.1583/05-1638MR.1.	2005	Brosi	Below-the-knee angioplasty in patients with end-stage renal disease	Determine clinical efficacy of below-the-knee (BTK) angioplasty in patients with end-stage renal disease	Switzerland	Inpatient (hospital) setting (other than dialysis)	Surgery	Primary balloon angioplasty of atherosclerotic infrapopliteal lesions.	Less than 6 months	No	Prevention and management	Cohort study	Observational	1995	2004	Equal to or greater than 75%	29	72.4	67.9	Haemodialysis and peritoneal dialysis	No	Combination of participants with and without diabetes		Major amputation was necessary in 4 (11%) limbs, all in CLI patients, with the first month after angioplasty. Cumulative freedom from major amputation in all patients was 88%,8 4%, 79%, and 73% after 3, 6, 9, and 12 months, respectively. One major amputation was required after 1 year in a patient who had experience primary hemodynamic success.		Primary technical success was achieved in 37 (97%) limbs. , Pedal arteries were severely diseased in all, and complete occlusion of the pedal arch was found in 58% (18/31)., Hemodynamic success was found in only 19 (50%) limbs. , Clinical success was was 32% after 3 months, 28% after 6, 9 and 12 months. , An additional bypass procedure was required in 4 (11%) limbs. Repeat percutaneous translumin…			0	1	0	1	0	2
Caetano AP, Conde Vasco I, Veloso Gomes F, Costa NV, Luz JH, Spaepen E et al. Successful Revascularization has a Significant Impact on Limb Salvage Rate and Wound Healing for Patients with Diabetic Foot Ulcers: Single-Centre Retrospective Analysis with a Multidisciplinary Approach. Cardiovasc Intervent Radiol. 2020;43(10):1449-59. doi:10.1007/s00270-020-02604-4.	2020	Caetano	Successful Revascularization has a Significant Impact on Limb Salvage Rate and Wound Healing for Patients with Diabetic Foot Ulcers: Single-Centre Retrospective Analysis with a Multidisciplinary Approach	Analyze the impact of endovascular revascularization on major amputation rates and wound healing for patients with diabetic foot ulcers (DFUs)	Portugal	Inpatient (hospital) setting (other than dialysis)	Care from one or more health professionals	endovascular revascularization and diabetic foot unit attendance	5 years or more	No	Prevention and management	Cohort study	Observational	2014	2018	Less than 75% (but 10 or more participants had ESRD and results for this specific group are available)	42	48	63	Not reported	No	Presence or absence of diabetes not specified				Endovascular revascularization was successful for 40 patients (95%) but unsuccessful for 2 patients (5%)			0	0	0	1	0	1
Chang BB, Paty PS, Shah DM, Kaufman JL, Leather RP. Results of infrainguinal bypass for limb salvage in patients with end-stage renal disease. Surgery. 1990;108(4):742-6; discussion 6-7.	1990	Chang	Results of infrainguinal bypass for limb salvage in patients with end-stage renal disease	Summarize results of limb salvage in patients with ESRD requiring infrainguinal bypass for occlusive disease	United States of America	Inpatient (hospital) setting (other than dialysis)	Surgery	Infrainguinal bypass	5 years or more	Yes	Prevention and management	Case control study	Observational	1983	1989	Equal to or greater than 75%	24	48	52	Haemodialysis and peritoneal dialysis	Yes	Combination of participants with and without diabetes	6 patients (25%) with nonhealing ulcers with a surface area greater than 6cm2 were treated successfully.	Cumulative limb salvage at 1 year was 90%, 2 years was 83% and 5 years was 69%. , One patient (4%) with bypass occlusion required major amputation. Three major amputations (9% of limbs at risk) were performed for recurrent ischemic symptoms in the face of a patent bypass. , The subset of patients with ESRD and diabetes had comparable limb salvage rates.		More than 96% of all patients with ESRD had improvement of ischemic symptoms in the immediate postoperative period. Patency was 90% at 1 year, 90% at 2 years and 72% at 5 years.			1	1	0	1	0	3
Chang C-T, Shen M-Y, Lee A-S, Wang C-C, Chen W-Y, Chang C-M et al. Electronegative low-density lipoprotein increases the risk of ischemic lower-extremity peripheral artery disease in uremia patients on maintenance hemodialysis. Sci Rep. 2017;7(1):4654-10. doi:10.1038/s41598-017-04063-3.	2017	Chang	Electronegative low-density lipoprotein increases the risk of ischemic lower-extremity peripheral artery disease in uremia patients on maintenance hemodialysis	Examine the occurrence of ischemic lower-extremity PAD among hemodialysis patients and estimate the hazard ratio of L5% on peripheral artery disease (PAD)	Taiwan	Not reported	Screening by a health professional	Screen for low-density lipoprotein (LDL) and then examine the occurrence of ischemic lower-extremity peripheral artery disease (PAD). Also, separate LDLs into 5 subfractions using fast-protein liquid chromatography with an anion-exchange column. Particular focus for the most electronegative LDL subfraction (L5).	5 years or more	No	Prevention	Cohort study	Observational	2010	2015	Equal to or greater than 75%	90	77.5	56	Haemodialysis	No	Combination of participants with and without diabetes				During 5-year follow up, peripheral artery disease (PAD) developed in 22 (24.4%) patients. L5% was higher in the PAD group (3.03%) than in those who did not develop PAD (1.13%), p<0.001. , L5% significantly increased the adjusted hazard ratio of ischemic lower-extremity PAD (1.54 [95% CI, 1.14 €“2.10], p=0.005)			0	0	0	1	0	1
Chang H, Rockman CB, Jacobowitz GR, Cayne NS, Veith FJ, Han DK et al. Interplay of Diabetes Mellitus and End-Stage Renal Disease in Open Revascularization for Chronic Limb-Threatening Ischemia. Ann Vasc Surg. 2021;72:552-62. doi:10.1016/j.avsg.2020.10.003.	2021	Chang	Interplay of Diabetes Mellitus and End-Stage Renal Disease in Open Revascularization for Chronic Limb-Threatening Ischemia	Assess the effect of diabetes mellitus on outcomes after an infrainguinal bypass for chronic limb-threatening ischemia (CLTI) in patients with end-stage renal disease	United States of America	Inpatient (hospital) setting (other than dialysis)	Surgery	Open infrainguinal revascularization with or without adjunctive percutaneous vascular intervention (PVI)	1 year to less than 2 years	No	Prevention and management	Cohort study	Observational	2003	2020	Equal to or greater than 75%	1058	67	66.5	Haemodialysis and peritoneal dialysis	No	Combination of participants with and without diabetes		Amputation was required by 4.2% with diabetes, 1.5% without diabetes, p = 0.027. , Perioperatively, diabetes was not associated with the composite outcome of major amputation or death (OR 1.08; 95% CI, 0.73-1.59;p = 0.699). , At one year the major amputation rate in the diabetes group did not differ significantly (28% DM vs. 23%non-DM; p = 0.113). Of 239 (23%) patients who died by 1 year, 163 (15…		Reintervention was required by 25% with diabetes, 17% without diabetes, p = 0.003. Primary patency was 90% with diabetes, 91% without diabetes, p = 0.832. , Perioperatively, diabetes was not associated with perioperative primary patency (OR 1.11; 95% CI, 0.69-1.79;p = 0.668)., At one year patients with diabetes had a significantly higher rate of reinterventions (36% vs. 26%;p = 0.002) but there w…	Median total length of stay was 10 days for patients with diabetes, 8.5 days for patients without diabetes, p = 0.39. Median postoperative length of stay was 7 days for patients with diabetes, 6 days for patients without diabetes, p = 0.142		0	1	0	1	1	3
Chao J-Y, Li C-Y, Wang M-C, Kao Yang Y-H. The use of activated vitamin D and risks of hospitalization for infection and amputation in incident hemodialysis patients in Taiwan: a nationwide population-based cohort study. BMC Nephrol. 2020;21(1):331-. doi:10.1186/s12882-020-01988-2.	2020	Chao	The use of activated vitamin D and risks of hospitalization for infection and amputation in incident hemodialysis patients in Taiwan: a nation wide population-based cohort study	Investigate the occurrence of acute myocardial infarction (AMI), ischemic stroke, lower limb amputation, and hospitalization for infection in maintenance hemodialysis patients who were prescribed activated vitamin D	Taiwan	Not reported	Medication	Activated Vitamin D	5 years or more	Yes	Prevention	Cohort study	Observational	2001	2009	Equal to or greater than 75%	52757	48	63	Haemodialysis	No	Combination of participants with and without diabetes		in total 2623 experienced an amputation procedure, the incidence rates of amputation were lower for vitamin D users (253 or 3.1%) than that in non-users (2370 or 5.4%). The amputation event of interest per 1000 person years was 8.8 for vitamin D users and 17.1 for non users.			in total 22,082 patients hospitalized for infection, the incidence rates of hospitalization for infection were lower for vitamin D users (2904 or 41%) than that in non-users (19178 or 50.4%). The multivariable adjusted subdistribution hazard ratios (SHR) of amputation or infection hospitalization was 0.84 (95% CI, 0.74 €“0.96) for vitamin D users compared to 0.91 (95% CI, 0.88 €“0.95) for non-use…		0	1	0	0	1	2
Cheun TJ, Jayakumar L, Ferrer L, Miserlis D, Mitromaras C, Sideman MJ et al. Implications of early failure of isolated endovascular tibial interventions. J Vasc Surg. 2020;72(1):233-40.e2. doi:10.1016/j.jvs.2019.11.035.	2020	Cheun	Implications of early failure of isolated endovascular tibial interventions	Examine patients suffering early failure (<30 days) after isolated tibial arterial interventions	United States of America	Inpatient (hospital) setting (other than dialysis)	Surgery	endovascular tibial interventions	5 years or more	No	Management	Cohort study	Observational	2007	2017	Less than 75% (but 10 or more participants had ESRD and results for this specific group are available)	60	48	63	Haemodialysis and peritoneal dialysis	No	Presence or absence of diabetes not specified				Early failure (within 30 days) or endovascular intervention was experienced by 34 of 60 (57%) dialysis patients			0	0	0	1	0	1
Chien S-H, Huang C-C, Hsu H, Chiu C-HM, Lin C-M, Tsai J-P. Free tissue transfers for limb salvage in patients with end-stage renal disease on dialysis. Plast Reconst Surg. 2011;127(3):1222-8. doi:10.1097/PRS.0b013e318205f461.	2011	Chien	Free Tissue Transfers for Limb Salvage in Patients with End-Stage Renal Disease on Dialysis	Determine overall flap survival (success) and postoperative outcome of all patients with end-stage renal disease who underwent free tissue transfer due to skin defect of the foot (19/20) or lower leg	Taiwan	Inpatient (hospital) setting (other than dialysis)	Surgery	Free tissue transfer	2 years to less than 5 years	No	Management	Cohort study	Observational	2005	2009	Equal to or greater than 75%	20	55	64	Haemodialysis and peritoneal dialysis	No	All had diabetes	19 out of 20 (95%) flaps were successful	Four patients eventually required major limb amputation because of progressive infection at the recipient site. te. There were no further major limb amputations in these patients during the long-term follow-up. The total limb salvage rate was 80 percent.					1	1	0	0	0	2
Chou HH, Huang HL, Hsieh CA, Jang SJ, Tzeng IS, Ko YL. Drug-Coated Balloon vs. Conventional Balloon Angioplasty in Dialysis Patients With Symptomatic Femoropopliteal Disease - A Matched Comparison. Circ J. 2018;82(7):1908-16. doi:10.1253/circj.CJ-18-0077.	2018	Chou	Drug-Coated Balloon vs. Conventional Balloon Angioplasty in Dialysis Patients With Symptomatic Femoropopliteal Disease	Compare the efficacy and clinical outcomes of drug-coated balloon (DCB) vs. percutaneous transluminal angioplasty (PTA) with provisional stent implantation in dialysis patients with femoropopliteal disease	China	Inpatient (hospital) setting (other than dialysis)	Surgery	Drug-coated balloon (DCB) or conventional balloon percutaneous transluminal angioplasty (PTA). After discharge, all patients were followed at an outpatient clinic. Patients with tissue loss underwent wound debridement, free flap transplant, and hyperbaric oxygen therapy by a plastic surgeon or orthopedist until their wounds healed	2 years to less than 5 years	Yes	Prevention and management	Case control study	Observational	2009	2016	Equal to or greater than 75%	130	48	67	Haemodialysis and peritoneal dialysis	No	Combination of participants with and without diabetes		No differences were observed in the rates of freedom from, minor amputation (82.1% vs. 78.6%, P=0.558) and major amputation (98.8% vs. 100%, P=0.309) between the groups at 2 years		Freedom from binary restenosis and clinically driven target lesion revascularization (CD-TLR) were significantly higher in the drug coated balloon (DCB) group compared with the PTA group (18.6% vs. 52.4%, P<0.001 and 25.9% vs. 56.4%, P=0.001, respectively)			0	1	0	1	0	2
Cox MH, Robison JG, Brothers TE, Elliott BM. Contemporary Analysis of Outcomes following Lower Extremity Bypass in Patients with End-stage Renal Disease. Ann Vasc Surg. 2001;15(3):374-82. doi:10.1007/s100160010067.	2001	Cox	Contemporary Analysis of Outcomes following Lower Extremity Bypass in Patients with End-stage Renal Disease	To compare outcomes following infrainguinal bypass between patients with end-stage renal disease (ESRD) and patients with normal renal function (NRF)	United States of America	Inpatient (hospital) setting (other than dialysis)	Surgery	Infrainguinal bypass	2 years to less than 5 years	Yes	Prevention and management	Case control study	Observational	1990	1999	Less than 75% (but 10 or more participants had ESRD and results for this specific group are available)	63	60	61.1	Not reported	No	Combination of participants with and without diabetes		Limb salvage at 36 months was 62%. Among patients with ESRD, the limb salvage rate was lower in patients with tissue necrosis (46% at 36 months) than in patients without tissue necrosis (95% at 36 months, HR = 15.6, 95%CI = 1.8-135.5)., Sensitivity analysis showed that bypass operation offered greater improvement in quality adjusted life years (QALY) than did amputation and non- operative managem…		Patency: unable to extract data, Sensitivity analysis showed that bypass operation offered greater improvement in quality adjusted life years (QALY) than did amputation and non- operative management over a broad range of operative mortality and limb salvage rates.			0	1	0	1	0	2
Czyrny JJ, Merrill A. Rehabilitation of amputees with end-stage renal disease: Functional outcome and cost. Am J Phys Med Rehabil. 1994;73(5):353-7. doi:10.1097/00002060-199409000-00009.	1994	Czyrny	Rehabilitation of amputees with end-stage renal disease: Functional outcome and cost	Compare functional outcomes and cost of rehabilitation of amputees with ESRD versus those with peripheral vascular disease (PVD) without renal failure	United States of America	Rehabilitation unit	Rehabilitation	Inpatient rehabilitation for patients following major lower limb amputation	Less than 6 months	Yes	Management	Case control study	Observational	1989	1992	Less than 75% (but 10 or more participants had ESRD and results for this specific group are available)	19	58	59	Haemodialysis and peritoneal dialysis	No	Combination of participants with and without diabetes		Eight patients (42%) received and ambulated with prosthesis during admission. Complications from prosthetic fit occured in one (5%) renal patient. , Functional independence measure (FIM) scores improved on average by 14.6 (80.3 to 94.9) but this was not statistically significant (p = 0.94)			Duration of prosthetic training and rehabilitation LOS were approx. 20 days (+/- 27 days)., Length of stay was on average 27 days (SD 11)., One renal patient (5%) required transfer to the acute service.		0	1	0	0	1	2
De Mauri A, Torreggiani M, Brambilla M, Chiarinotti D. Vitamin K Antagonist Therapy Is a Risk Factor for Ulcer Development and Death Among Dialyzed Patients: Vitamin K Antagonists and Uremic Foot. Ther Apher Dial. 2017;21(2):150-6. doi:10.1111/1744-9987.12507.	2017	De Mauri	Vitamin K Antagonist Therapy Is a Risk Factor for Ulcer Development and Death Among Dialyzed Patients	Evaluate the relationship between Vitamin K antagonist therapy and the occurrence of ulcers and to investigate the correlation between Vitamin K antagonists and death in the uremic population	Italy	Dialysis unit	Medication	Vitamin K Antagonist Therapy	2 years to less than 5 years	Yes	Prevention	Cohort study	Observational	2005	2011	Equal to or greater than 75%	316	65	68	Haemodialysis	No	Combination of participants with and without diabetes	Patients assuming vitamin K antagonists compared with patients not assuming it, showed a statistically significant higher prevalence of ulcers (64 vs.19%)., Patients assuming vitamin K antagonists had a higher risk of developing ulcers (HR 3.973, 95% CI 3.763 to 12.61, P<0.001)., In the multiple regression model, peripheral artery disease (PAD) (Î²= 0.35), vitamin K antagonists (Î²= 0.31), diabet…	Patients assuming vitamin K antagonist compared with patients not assuming it, showed a statistically significant higher prevalence of amputation (18 vs. 7%)., Patients assuming vitamin K antagonists had a higher risk of undergoing lower limb amputation (HR 2.482, 95% CI 1.256 to 7.821, P= 0.0147).		Patients assuming vitamin K antagonist compared with patients not assuming it, showed a statistically significant higher prevalence of peripheral artery disease (PAD) (78 vs 47%).			1	1	0	1	0	3
De Mauri A, Vidali M, Chiarinotti D, Dianzani U, Rolla R. Lipoprotein‐associated phospholipase A2 predicts lower limb ischemia in hemodialysis subjects. Ther Apher Dial. 2020;24(5):548-53. doi:10.1111/1744-9987.13465.	2020	De Mauri	Lipoprotein-associated phospholipase A2 predicts lower limb ischemia in hemodialysis subjects	Evaluate the relationship between ipoprotein-associated phospholipase A2 (Lp-PLA2) and lower limb ischemia (limb ischemia, defined as de novo occurrence of foot ulcers, with or without soft tissue infection, ischemia or gangrene, amputation of the limb upon or below the malleoli, acute occlusive ischemia and the worsening of the pre-enrollment condition needing endovascular or surgical revascular…	Italy	Dialysis unit	Other	lipoprotein-associated phospholipase A2 (Lp-PLA^2)	5 years or more	No	Prevention	Cohort study	Observational	2013	2018	Equal to or greater than 75%	102	63	71	Haemodialysis	No	Combination of participants with and without diabetes	Patients with abnormal ipoprotein-associated phospholipase A2 (Lp-PLA2) activity had higher occurrence of lower limb lesions during the follow up (44% vs 17%, Log Rank test P= .003). , In multivariate Cox regression analysis, only diabetes (HR = 7.94, P< .001) and Lp-PLA2activity (HR = 1.01, P= .018) remained independently associated with time to lower limb ischemia. , When the presence of previo…			Patients with abnormal ipoprotein-associated phospholipase A2 (Lp-PLA2) activity had higher occurrence of lower limb lesions during the follow up (44% vs 17%, Log Rank test P= .003). , In multivariate Cox regression analysis, only diabetes (HR = 7.94, P< .001) and Lp-PLA2activity (HR = 1.01, P= .018) remained independently associated with time to lower limb ischemia. , When the presence of previo…			1	0	0	1	0	2
Deery SE, Hicks CW, Canner JK, Lum YW, Black JH, Abularrage CJ. Patient-centered clinical success after lower extremity revascularization for complex diabetic foot wounds treated in a multidisciplinary setting. J Vasc Surg. 2022;75(4):1377-84.e1. doi:10.1016/j.jvs.2021.11.063.	2022	Deery	Patient-centered clinical success after lower extremity revascularization for complex diabetic foot wounds treated in a multidisciplinary setting	Evaluate clinical success after lower extremity bypass (LEB) or peripheral vascular intervention (PVI) for tissue loss in diabetic patients treated in a multidisciplinary setting to better understand what factors are associated with success from a patient €™s perspective	United States of America	Multiple settings	Surgery	Endovascular recanalization or subsequent lower extremity bypass, as part of management in a multidisciplinary diabetic limb preservation service	2 years to less than 5 years	Yes	Management	Cohort study	Observational	2012	2020	Less than 75% (but 10 or more participants had ESRD and results for this specific group are available)	21	48	63	Not reported	Yes	All had diabetes	Clinical success (secondary patency to the point of wound healing) was achieved by 12 patients (57%). There were nonsignificant negative associations between clinical success and dialysis dependence (OR, 0.35; CI, 0.12-1.03;P=0.06)			Clinical success (secondary patency to the point of wound healing) was achieved by 12 patients (57%). There were nonsignificant negative associations between clinical success and dialysis dependence (OR, 0.35; CI, 0.12-1.03;P=0.06)			1	0	0	1	0	2
Di Capua J, Reid NJ, Som A, An T, López DB, So AJ et al. The Effect of Preoperative Renal Failure on Outcomes Following Infrainguinal Endovascular Interventions for Peripheral Arterial Disease. J Vasc Interv Radiol. 2021;32(3):459-65. doi:10.1016/j.jvir.2020.10.020.	2021	Di Capua	The Effect of Preoperative Renal Failure on Outcomes Following Infrainguinal Endovascular Interventions for peripheral Arterial Disease	To analyze the effect of a patient €™s renal failure status on acute outcomes after lower extremity endovascular interventions for peripheral artery disease.	United States of America	Inpatient (hospital) setting (other than dialysis)	Surgery	Lower extremity endovascular (LEE) arterial interventions	Not reported	No	Prevention and management	Cohort study	Observational	2014	2017	Less than 75% (but 10 or more participants had ESRD and results for this specific group are available)	742	62.3	63	Haemodialysis and peritoneal dialysis	No	Combination of participants with and without diabetes		10.7% of patients experienced an amputation. , 14.6% of patients experienced a major adverse limb event (MALE, ipsilateral transtibial or proximal amputation, new bypass operation, thrombectomy/thrombolysis)		18.3% of patients experienced reoperation. , 14.6% of patients experienced a major adverse limb event (MALE, ipsilateral transtibial or proximal amputation, new bypass operation, thrombectomy/thrombolysis)	68.5% of patients experienced length of stay of >1 day.		0	1	0	1	1	3
Dosluoglu HHMD, Cherr GSMD, Lall PM, Harris LMMD, Dryjski MLMD. Peroneal artery-only runoff following endovascular revascularizations is effective for limb salvage in patients with tissue loss. J Vasc Surg. 2008;48(1):137-43. doi:10.1016/j.jvs.2008.02.070.	2008	Dosluoglu	Peroneal artery-only runoff following endovascular revascularizations is effective for limb salvage inpatients with tissue loss	Compare the efficacy of endovascular (EV) interventions with peroneal artery-only runoff (PAOR) to those with other runoff vessels for limb salvage (LS) in patients presenting with tissue loss (including ulcer or gangrene)	United States of America	Inpatient (hospital) setting (other than dialysis)	Surgery	Endovascular revascularisation with additional outpatient follow up. All patients with open wounds were followed in a vascular surgery wound clinic until wounds were all healed. , Healing wound was defined as a wound with clean base with healthy granulation tissue, decreasing in size	1 year to less than 2 years	Yes	Prevention and management	Cohort study	Observational	2001	2006	Less than 75% (but 10 or more participants had ESRD and results for this specific group are available)	12	48	63	Not reported	No	Presence or absence of diabetes not specified		12-month limb salvage was 65% (+/- 14%).					0	1	0	0	0	1
Dossa CD, Shepard AD, Amos AM, Kupin WL, Reddy DJ, Elliott JP et al. Results of lower extremity amputations in patients with end-stage renal disease. J Vasc Surg. 1994;20(1):14-9. doi:10.1016/0741-5214(94)90170-8.	1994	Dossa	Results of lower extremity amputations in patients with end-stage renal disease	Determine the impact of end-stage renal disease (ESRD) on the outcome of patients undergoing lower extremity (LE) amputation	United States of America	Inpatient (hospital) setting (other than dialysis)	Surgery	Lower extremity amputation	1 year to less than 2 years	Yes	Management	Cohort study	Observational	1987	1991	Less than 75% (but 10 or more participants had ESRD and results for this specific group are available)	85	45	64	Haemodialysis and peritoneal dialysis	Yes	Combination of participants with and without diabetes		Of the 65 surviving patients with ESRD, 34 (62%) were rehabilitated to independent ambulation, six with unilateral AKAs, 25 with unilateral BKAs, one with bilateral BKAs, and four with unilateral foot amputations. Thirteen (24%) patients with ESRD required wheelchairs, and 11 (17%) were confined to bed. Follow-up data were lacking in seven., The revision rates were 3% (1 of 39) for AKAs, 14% (9 o…					0	1	0	0	0	1
Doyle MD, Hastings G, Dontsi M, Dionisopoulos SB, Kane LA, Pollard JD. The Effects of Endovascular Timing and In-line Flow on the Success of Pedal Amputations. J Foot Ankle Surg. 2020;59(5):964-8. doi:10.1053/j.jfas.2020.03.018.	2020	Doyle	The Effects of Endovascular Timing and In-line Flow on the Success of Pedal Amputations	To evaluate the effects of timing between endovascular intervention and minor lower-extremity amputations (digital, partial ray, transmetatarsal) and the role it has on wound healing and limb loss within 1 year.	United States of America	Inpatient (hospital) setting (other than dialysis)	Surgery	Undergone toe, partial ray, or transmetatarsal amputations (TMAs) and received endovascular intervention	1 year to less than 2 years	No	Prevention and management	Cohort study	Observational	2008	2014	Less than 75% (but 10 or more participants had ESRD and results for this specific group are available)	82	48	63	Not reported	No	Presence or absence of diabetes not specified	39% of patients experienced optimal (a healed surgical site with suture removal within 2 to 4 weeks postoperatively and no wound dehiscence, infection, unanticipated return to the operating room, or a more proximal amputation, whether minor or major) or delayed healing (a surgical site that healed but required local wound care for ‰¤3 months), while 61% experienced failure ( amputation that requi…	61% experienced failure ( amputation that required revision surgery, an unanticipated return to the operating room, need for open bypass, failure to heal within 90 days, or progression to a more proximal amputation within 12 months from the index amputation) to heal.					1	1	0	0	0	2
Edwards JM, Taylor LM, Jr., Porter JM. Limb salvage in end-stage renal disease (ESRD). Comparison of modern results in patients with and without ESRD. Arch Surg. 1988;123(9):1164-8. doi:10.1001/archsurg.1988.01400330144022.	1988	Edwards	Limb Salvage in End-Stage Renal Disease (ESRD)	Report on experience managing patients with ESRD who require leg bypass	United States of America	Inpatient (hospital) setting (other than dialysis)	Surgery	Infrainguinal bypass revascularisation	5 years or more	No	Prevention and management	Case series	Observational	1980	1987	Less than 75% (but 10 or more participants had ESRD and results for this specific group are available)	19	57.9	46.4	Haemodialysis and peritoneal dialysis	Yes	Combination of participants with and without diabetes		After one year, limb salvage rate was 76%. After three years, limb salvage rate remained 76%. Overall 5 of 19 ESRD patients required major amputation. The five major amputations required occurred in the presence of a patent graft.		After one year, 85% of grafts remained patent. After three years, 85% of grafts remained patent.			0	1	0	1	0	2
El Nekidy WS, El‐Masri MM, Ghazi IM, Soong D. Factors predicting vancomycin therapy outcomes in hemodialysis outpatients and the role of the nephrology stewardship pharmacist. Hemodial Int. 2019;23(4):449-57. doi:10.1111/hdi.12775.	2019	El Nekidy	Factors predicting vancomycin therapy outcomes in hemodialysis outpatients and the role of the nephrology stewardship pharmacist	To evaluate the treatment outcomes of vancomycin in hemodialysis patients	Canada	Dialysis unit	Medication	Parenteral vancomycin for suspected or documented Methicillin-resistant Staphylococcus Aureus infection	Not reported	No	Management	Cohort study	Observational	Not reported	Not reported	Equal to or greater than 75%	77	54.3	63.4	Haemodialysis	No	Combination of participants with and without diabetes			Of osteomyelitis / diabetic foot infection, 9 (23%) achieved clinical cure while 30 (77%) experienced clinical failure.				0	0	1	0	0	1
Engelhardt M, Bruijnen H, Schaal J, Wölfle KD. Risk factors for survival in patients with end-stage renal disease undergoing infrainguinal bypass surgery. Vasa. 2005;34(4):250-4. doi:10.1024/0301-1526.34.4.250.	2005	Engelhardt	Risk factors for survival in patients with end-stage renal disease undergoing infrainguinal bypass surgery	To assess negative predictors of survival in patients with ESRD undergoing infrainguinal bypass grafting for critical limb ischemia (CLI).	Germany	Inpatient (hospital) setting (other than dialysis)	Surgery	Infrainguinal bypass revascularisation	2 years to less than 5 years	No	Prevention and management	Cohort study	Observational	1998	2002	Equal to or greater than 75%	49	89.8	63	Haemodialysis	No	Combination of participants with and without diabetes		Five patients (10.2%) required early major amputation. Limb salvage rates at one, two and four years were 80.4%, 80.4% and 53.6% respectively. In two patients (4.1%) amputation had to be performed despite patent grafts.		One-year, two-year and four-year primary patency rates were all 81.4%.			0	1	0	1	0	2
Fallon JMMD, Goodney PPMDMS, Stone DHMD, Patel VIMDMPH, Nolan BWMDMS, Kalish JAMD et al. Outcomes of lower extremity revascularization among the hemodialysis-dependent. J Vasc Surg. 2015;62(5):1183-91.e1. doi:10.1016/j.jvs.2015.06.203.	2015	Fallon	Outcomes of lower extremity revascularization among the hemodialysis-dependent	Examine contemporary real world open and endovascular outcomes of hemodialysis-dependent patients to better facilitate patient selection for intervention	United States of America	Inpatient (hospital) setting (other than dialysis)	Surgery	Endovascular intervention or open bypass	5 years or more	Yes	Prevention and management	Cohort study	Observational	2003	2013	Equal to or greater than 75%	689	66	63	Haemodialysis	No	Combination of participants with and without diabetes		Overall amputation-free rates at 1 and 2 years were 72% and 62%, respectively. Amputation with a patent limb occurred in 7% (n=41) of the overall group, 5% (n=15)in surgical bypass, and 9% (n=26) in the endovascular group (P less than or = .001 between surgical bypass and endovascular)		At 2 years, 76% of endovascular revascularizations were patent compared with 26% for open surgical bypass (P = .02)			0	1	0	1	0	2
Farchioni L, Gennai S, Giuliani E, Cuccì A, Lauricella A, Leone N et al. A prognostic risk score for major amputation in dialysis patients with chronic limb-threatening ischemia after endovascular revascularization. Int Angiol. 2021;40(3):206-12. doi:10.23736/s0392-9590.21.04523-5.	2021	Farchioni	A prognostic risk score for major amputation in dialysis patients with chronic limb-threatening ischemia after endovascular revascularization	Assess the impact of several factors to conduct a stratification of the amputation risk in end-stage chronic kidney disease (CKD) patients with chronic limb threatening ischemia (CLTI) receiving endovascular revascularization	Italy	Inpatient (hospital) setting (other than dialysis)	Surgery	endovascular revascularization	1 year to less than 2 years	No	Prevention and management	Cohort study	Observational	2010	2016	Equal to or greater than 75%	82	70.7	70.4	Not reported	No	Combination of participants with and without diabetes	Treatment led to healing in 39 patients (47.6%). The number of pathologic vessels non-revascularized were negatively associated with the wound healing (odds ratio [OR] 0.71; standard error [SE] 0.12; 95% confidence interval [CI] 0.51-0.99; P=0.047)	The number of major amputations was 28 (34.1%)., Arterial lesion severity (OR 1.20, SE 0.07, p = 0.001, 95% CI 1.07-1.34) and trophic lesion extension (OR 2.65, SE 0.78, p = 0.001, 95% CI 1.49-4.72) were associated with major amputation. , A prognostic score was proposed to predict the major amputation risk.		Reinterventions were necessary in 20 patients (24.4%).			1	1	0	1	0	3
Fard B, Dijkstra PU, Voesten HGJM, Geertzen JHB. Mortality, Reamputation, and Preoperative Comorbidities in Patients Undergoing Dysvascular Lower Limb Amputation. Ann Vasc Surg. 2020;64:228-38. doi:10.1016/j.avsg.2019.09.010.	2020	Fard	Mortality, Reamputation, and Preoperative Comorbidities in Patients Undergoing Dysvascular Lower Limb Amputation	Report the 30-day and 1-yearmortality and 1-year reamputation rates after major lower limb amputation (LLA) and to identify potential risk factors	The Netherlands	Inpatient (hospital) setting (other than dialysis)	Surgery	Dysvascular major lower limb amputation	1 year to less than 2 years	No	Prevention and management	Cohort study	Observational	2012	2013	Less than 75% (but 10 or more participants had ESRD and results for this specific group are available)	28	48	63	Haemodialysis	No	Presence or absence of diabetes not specified		Within 1 year 7 of 15 dialysis patients (47%) required ipsilateral reamputation					0	1	0	0	0	1
Fleming LW, Stewart CPU, Henderson IS, Jain AS. Limb amputation on renal replacement therapy. Prosthet Orthot Int. 2000;24(1):7-12. doi:10.1080/03093640008726516.	2000	Fleming	Limb amputation on renal replacement therapy	Examines the course of illness and survival patterns in both diabetic and non-diabetic patients on RRT (renal replacement therapy) who have undergone limb amputation	United Kingdom (England, Scotland, Wales, Northern Ireland)	Inpatient (hospital) setting (other than dialysis)	Surgery	Major amputation (15 patients lower limb, 2 patients upper limb)	2 years to less than 5 years	No	Management	Case series	Observational	1988	1996	Equal to or greater than 75%	17	82	55	Haemodialysis and peritoneal dialysis	Yes	Combination of participants with and without diabetes		Five patients had additional contralateral lower limb amputation. One patient required trans-femoral and knee disarticulation within one month of initial bilateral trans-tibial surgery.					0	1	0	0	0	1
Furuyama T, Yamashita S, Yoshiya K, Kurose S, Yoshino S, Nakayama K et al. The Controlling Nutritional Status Score is Significantly Associated with Complete Ulcer Healing in Patients with Critical Limb Ischemia. Ann Vasc Surg. 2020;66:510-7. doi:10.1016/j.avsg.2019.12.031.	2020	Furuyama	The Controlling Nutritional Status Score is Significantly Associated with Complete Ulcer Healing in Patients with Critical Limb Ischemia	Assess whether the Controlling Nutritional Status (CONUT) score was a significant predictor of complete ulcer healing in patients with critical limb ischemia (CLI)	Japan	Inpatient (hospital) setting (other than dialysis)	Surgery	Infrainguinal revascularization for critical limb ischemia	1 year to less than 2 years	No	Management	Cohort study	Observational	2013	2018	Less than 75% (but 10 or more participants had ESRD and results for this specific group are available)	53	48	63	Not reported	No	Presence or absence of diabetes not specified	Ulceration healed for 39 patients (74%). Ulceration did not heal for 14 patients (26%.)						1	0	0	0	0	1
Garimella PS, Balakrishnan P, Correa A, Poojary P, Annapureddy N, Chauhan K et al. Nationwide Trends in Hospital Outcomes and Utilization After Lower Limb Revascularization in Patients on Hemodialysis. JACC Cardiovasc Interv. 2017;10(20):2101-10. doi:10.1016/j.jcin.2017.05.050.	2017	Garimella	Nationwide Trends in Hospital Outcomes and Utilization After Lower Limb Revascularization in Patients on Hemodialysis	Describe the temporal trends and outcomes of endovascular and surgical revascularization in a large, nationally representative sample of patients with end-stage renal disease on hemodialysis hospitalized for peripheral artery disease (PAD)	United States of America	Inpatient (hospital) setting (other than dialysis)	Surgery	Endovascular and surgical revascularization	Less than 6 months	Yes	Prevention and management	Cohort study	Observational	2002	2012	Equal to or greater than 75%		57.1	66.5	Haemodialysis	No	Combination of participants with and without diabetes		For hospital admissions with surgical revascularisation, adjusted odds of amputation were 1.6 times that of endovascular revascularization (adjusted odds ratio: 1.57; 95% CI: 1.4 to 1.75). Between 2002 and 2012, the incidence of major amputation decreased slightly from 6.7% to 5.8% after surgery and from 10.2% to 7.0% after endovascular procedures. Minor amputations after endovascular procedures …		Incidence of overall complications increased marginally from 12.8% to 13.5% with endovascular revascularization, whereas it nearly doubled with surgery from 13.7% to 26.7%.	Median length of stay was 6.3 days for endovascular procedures and 9.3 days for surgical procedures (p<0.0001). , Length of stay for endovascular procedures remained stable, whereas a decrease was seen for surgical procedures		0	1	0	1	1	3
Garimella PS, Wang W, Lin S-F, Hymes J, Lacson E. Incident diabetic foot ulcers and mortality in hemodialysis patients: Incident diabetic foot ulcers. Hemodial Int. 2017;21(1):145-7. doi:10.1111/hdi.12490.	2017	Garimella	Incident diabetic foot ulcers and mortality in hemodialysis patients	Evaluate the association between the development of ulcers, amputation and mortality in a cohort of diabetic hemodialysis patients receiving monthly foot-checks	United States of America	Dialysis unit	Screening by a health professional	Monthly foot-check	2 years to less than 5 years	No	Prevention and management	Cohort study	Observational	2009	2012	Equal to or greater than 75%	13339	53.6	63.5	Haemodialysis	No	All had diabetes	1769 (13.3%) developed new ulcers. Median time to ulcer detection was approximately 5 months.	Incidence of major amputation was 6.4% among foot ulcer cases compared with 2.3% among at risk (nil foot ulcer) patients (p <0.001). , The odds of major amputation were 2.5 times higher for foot ulcer cases compared with at risk patients (nil foot ulcer) after multivariable adjustment.					1	1	0	0	0	2
Georgopoulos S, Filis K, Vourliotakis G, Bakoyannis C, Papapetrou A, Klonaris C et al. Lower Extremity Bypass Procedures in Diabetic Patients with End-Stage Renal Disease: Is It Worthwhile? Nephron. 2005;99(2):c37.	2005	Georgopoulos	Lower Extremity Bypass Procedures in Diabetic Patients with End-Stage Renal Disease: Is it worthwhile?	To examine graft patency, limb salvage and survival in patients with ESRD and diabetes following bypass grafting to treat lower limb critical ischemia.	Greece	Inpatient (hospital) setting (other than dialysis)	Surgery	Bypass revascularisation	5 years or more	No	Prevention and management	Case series	Observational	1994	2002	Equal to or greater than 75%	39	54	66	Haemodialysis and peritoneal dialysis	No	All had diabetes		The limb salvage rate was 65% at 1 year.		Primary patency rate was 64% at 1 year and 58% at 2 years. Secondary patency 69% at 1 year and 65% at 2 years.			0	1	0	1	0	2
Graziani L, Silvestro A, Bertone V, Manara E, Alicandri A, Parrinello G et al. Percutaneous transluminal angioplasty is feasible and effective in patients on chronic dialysis with severe peripheral artery disease. Nephrol Dial Transplant. 2007;22(4):1144-9. doi:10.1093/ndt/gfl764.	2007	Graziani	Percutaneous transluminal angioplasty is feasible and effective inpatients on chronic dialysis with severe peripheral artery disease	Assess the feasibility and efficacy of endovascular catheter-based techniques for severe PAD in patients on chronic dialysis.	Italy	Inpatient (hospital) setting (other than dialysis)	Surgery	Percutaneous transluminal angioplasty	2 years to less than 5 years	No	Prevention and management	Cohort study	Observational	2000	2004	Equal to or greater than 75%	107	70	66.8	Haemodialysis and peritoneal dialysis	No	Combination of participants with and without diabetes		Major amputation during follow-up was necessary in 20 (15.1%) limbs. , The cumulative limb salvage rates (and 95% CI) at 12, 24, 36 and 48 months were 86 (80 €“93%), 84 (77 €“91%),84 (77 €“91%) and 62% (39 €“99%), respectively. , In a multivariate analysis, presence at baseline of ulcer and/or gangrene of the foot was an independent predictor of major amputation (HR=7.03, 95% CI=1.1 €“43.0, P=0.0…		Periprocedural complication of distal embolization occurred in four cases (all were solved with no clinical consequences)., Primary technical success was achieved in 128 (97%) limbs. , During follow up a new intervention on the same leg was performed in 23 (17%) limb.			0	1	0	1	0	2
Guntani A, Yamaoka T, Okadome J, Kawakubo E, Kyuragi R, Homma K et al. Evaluation of the Paramalleolar Bypass for Critical Limb Ischemia Patients on Hemodialysis with Diabetes Mellitus and Chronic Renal Failure. Ann Vasc Dis. 2013;6(3):596-600. doi:10.3400/avd.oa.13-00059.	2013	Guntani	Evaluation of the paramalleolar bypass for critical limb ischemia patients on hemodialysis with diabetes mellitus and chronic renal failure	Assess the influence of diabetes mellitus (DM) and end-stage renal failure on hemodialysis (HD) on the healing time of tissue lesions and blood flow to the foot following a paramalleolar bypass in patients with critical limb ischemia (CLI)	Japan	Inpatient (hospital) setting (other than dialysis)	Surgery	Paramalleolar bypass grafting	1 year to less than 2 years	No	Prevention and management	Case control study	Observational	2007	Not reported	Less than 75% (but 10 or more participants had ESRD and results for this specific group are available)	10	48	63	Haemodialysis	No	All had diabetes	Mean time until ulcer healing was 2.5 months.	No patients required major amputation.		In the revascularized (direct) area, the change in the skin perfusion pressure, between before and after paramalleolar bypass was +25.3 mmHg (from 23.3 to 48.6 mmHg). , In the non-revascularized (indirect) area of the affected limb, the change in the skin perfusion pressure, between before and after paramalleolar bypass was +21.8 mmHg (from 29.2mmHg to 51.0 mmHg).			1	1	0	1	0	3
Hakaim AG, Gordon JK, Scott TE. Early outcome of in situ femorotibial reconstruction among patients with diabetes alone versus diabetes and end-stage renal failure: Analysis of 83 limbs. J Vasc Surg. 1998;27(6):1049-55. doi:10.1016/S0741-5214(98)70008-4.	1998	Hakaim	Early outcome of in situ femorotibial reconstruction among patients with diabetes alone versus diabetes and end- stage renal failure: Analysis of 83 limbs	To clarify the contribution of ESRD to the outcome of femorotibial reconstruction in the treatment of patients with diabetes and critical limb ischemia	United States of America	Inpatient (hospital) setting (other than dialysis)	Surgery	Distal lower extremity arterial bypasses	5 years or more	No	Prevention and management	Case control study	Observational	1992	1997	Less than 75% (but 10 or more participants had ESRD and results for this specific group are available)	25	76	65	Haemodialysis and peritoneal dialysis	No	All had diabetes		Major amputation was required for 9 limbs, with a cumulative 1-year limb salvage rate of 63%.		Within 30 days 4 patients (17%) experienced wound complications and no patients (0%) experienced graft thrombosis. , Late graft occlusions occurred among 3 patients (12%), Cumulative 1-year graft patency was 53%.			0	1	0	1	0	2
Harrington EB, Harrington ME, Schanzer H, Haimov M. End-stage renal disease—Is infrainguinal limb revascularization justified? J Vasc Surg. 1990;12(6):691-6. doi:10.1067/mva.1990.24603.	1990	Harrington	End-stage renal disease- Is infrainguinal limb revascularization justified?	To determine whether standard criteria for infrainguinal revascularization could be applied to patients with ESRD	United States of America	Inpatient (hospital) setting (other than dialysis)	Surgery	Infrainguinal revascularization	5 years or more	No	Prevention and management	Case series	Observational	1980	1990	Equal to or greater than 75%	39	43.6	65	Haemodialysis and peritoneal dialysis	Yes	Combination of participants with and without diabetes		The limb salvage rates for primary infrainguinal bypass was 91% at 1 year, 91% at 2 years, and 84% at 3 years		The patency for all primary infrainguinal procedures was 77% at 1 year and 68% at 2 years. The patency for primary infrainguinal bypass for limb salvage was 76% at 1 year and 70% at 2 years.			0	1	0	1	0	2
Hata Y, Iida O, Okamoto S, Ishihara T, Nanto K, Tsujumura T et al. Additional Risk Stratification Using Local and Systemic Factors for Patients with Critical Limb Ischaemia Undergoing Endovascular Therapy in the WIfI Era. Eur J Vasc Endovasc Surg. 2019;58(4):548-55. doi:10.1016/j.ejvs.2019.06.005.	2019	Hata	Additional Risk Stratification Using Local and Systemic Factors for Patients with Critical Limb Ischaemia Undergoing Endovascular Therapy in the WIfI Era	To evaluate whether systemic factors have the same impact on wound healing as limb characteristics in Critical Limb Ischemia patients undergoing endovascular therapy	Japan	Inpatient (hospital) setting (other than dialysis)	Surgery	Endovascular therapy	2 years to less than 5 years	No	Prevention and management	Cohort study	Observational	2010	2015	Less than 75% (but 10 or more participants had ESRD and results for this specific group are available)	398	48	63	Haemodialysis	No	Presence or absence of diabetes not specified	192 (48%) achieved wound healing, while 206 (52%) did not achieved wound healing.						1	0	0	0	0	1
Hatakeyama S, Saito M, Ishigaki K, Yamamoto H, Okamoto A, Ishibashi Y et al. Skin Perfusion Pressure Is a Prognostic Factor in Hemodialysis Patients. Int J Nephrol. 2012;2012:385274-7. doi:10.1155/2012/385274.	2012	Hatakeyama	Skin Perfusion Pressure Is a Prognostic Factor in Hemodialysis Patients	Identify risk factors for PAD including skin perfusion pressure (SPP) in hemodialysis patients	Japan	Outpatient setting (other than dialysis)	Screening by a health professional	Skin perfusion pressure measurement	2 years to less than 5 years	No	Prevention	Cohort study	Observational	2008	2010	Equal to or greater than 75%	373	55.5	71.4	Haemodialysis	No	Combination of participants with and without diabetes		Skin perfusion pressure greater than or equal to 70mmHg (compared with less than 70mmHg) was associated with better lower limb survival (peripheral angioplasty or amputation events), hazard ratio 4.722 (95% CI 1.539-14.490, p 0.007). , More risk factors for each patient (skin perfusion pressure less than 70mmHg, cardiovascular disease, diabetes and smoking) was associated worse lower limb surviva…		Skin perfusion pressure greater than or equal to 70mmHg (compared with less than 70mmHg) was associated with better lower limb survival (peripheral angioplasty or amputation events), hazard ratio 4.722 (95% CI 1.539-14.490, p 0.007). , More risk factors for each patient (skin perfusion pressure less than 70mmHg, cardiovascular disease, diabetes and smoking) was associated worse lower limb surviva…			0	1	0	1	0	2
Hicks CW, Canner JK, Kirkland K, Malas MB, Black JH, Abularrage CJ. Hemodialysis patients have worse outcomes after infrageniculate revascularization procedures. J Surg Res. 2018;226:72-81. doi:10.1016/j.jss.2018.01.019.	2018	Hicks	Hemodialysis patients have worse outcomes after infrageniculate revascularization procedures	Compare outcomes for hemodialysis (HD) versus non-HD patients after infrageniculate open lower extremity bypass (LEB) and endovascular peripheral vascular interventions (PVIs)	United States of America	Inpatient (hospital) setting (other than dialysis)	Surgery	Infrageniculate open lower extremity bypass (LEB) and endovascular peripheral vascular interventions (PVIs)	1 year to less than 2 years	Yes	Prevention and management	Cohort study	Observational	2008	2014	Less than 75% (but 10 or more participants had ESRD and results for this specific group are available)	267	72	66	Haemodialysis	No	Combination of participants with and without diabetes		For patients undergoing endovascular procedures, major amputation was required by 26.6% and major amputation time was approximately 236 days. , For patients undergoing bypass, major amputation was required by 27.3% and major amputation time was approximately 256 days.		For patients undergoing endovascular procedures, 1 year primary patency was 70.0%, while secondary patency was 81.6%. , For patients undergoing bypass, 1 year primary patency was 65.9%, while secondary patency was 70.5%.			0	1	0	1	0	2
Hidaka S, Kobayashi S, Iwagami M, Isshiki R, Tsutsumi D, Mochida Y et al. Sarpogrelate Hydrochloride, a Selective 5-HT2A Receptor Antagonist, Improves Skin Perfusion Pressure of the Lower Extremities in Hemodialysis Patients with Peripheral Arterial Disease. Ren Fail. 2013;35(1):43-8. doi:10.3109/0886022X.2012.734758.	2013	Hidaka	Sarpogrelate Hydrochloride, a Selective 5-HT2A Receptor Antagonist, Improves Skin Perfusion Pressure of the Lower Extremities in Hemodialysis Patients with Peripheral Arterial Disease	Compare the effects of sarpogrelate and cilostazol in hemodialysis (HD) patients withPAD	Japan	Not reported	Medication	Sarpogrelate (5HT2 antagonist, 300 mg/day) or cilostazol (antiplatelet, 200 mg/day)	6 months to less than 1 year	Yes	Management	Randomised controlled trial	Experimental	2009	2010	Equal to or greater than 75%	35	60	71.3	Haemodialysis	No	Combination of participants with and without diabetes				Basal levels of skin perfusion pressure (SPP) were not different between the two groups. SPP levels significantly increased in both groups at 24 weeks: from 43mmHg to 55mmHg in the sarpogrelate group (p<0.05); from 49mmHg to 66mmHg in the cilostazol group (p<0.01). There were no differences between the two groups at 24 weeks. The percent change rates of SPP were 51% in the sarpogrelate group and …			0	0	0	1	0	1
Higashino N, Iida O, Hata Y, Asai M, Masuda M, Okamoto S et al. Impact of Longer Hemodialysis Vintage with Higher Serum Phosphorus Level on Clinical Outcomes in Patients with Chronic Limb-Threatening Ischemia Presenting Tissue Loss after Endovascular Therapy. J Atheroscler Thromb. 2022;29(3):370-8. doi:10.5551/jat.60095.	2022	Higashino	Impact of Longer Hemodialysis Vintage with Higher Serum Phosphorus Level on Clinical Outcomes in Patients with Chronic Limb-Threatening Ischemia Presenting Tissue Loss after Endovascular Therapy	To explore the risk factors, including hemodialysis vintage and serum phosphorus levels, on clinical outcomes after endovascular therapy (EVT) in hemodialysis patients with chronic limb threatening ischemia (CLTI)	Japan	Inpatient (hospital) setting (other than dialysis)	Surgery	endovascular therapy	1 year to less than 2 years	No	Prevention and management	Cohort study	Observational	2007	2016	Equal to or greater than 75%	374	73.3	72.3	Haemodialysis	No	Combination of participants with and without diabetes	The 1-year wound healing rate was 57.1% ±3.0%. WIfI stage 4 (HR, 0.713; 95% CI, 0.519 €“0.979; p=0.037) was significantly associated with 1-year wound healing. Longer vintages for hemodialysis with higher serum phosphorus levels (HR, 0.684; 95% CI, 0.467 €“1.000; p=0.050) were marginally but not significantly associated with 1-year wound healing.	1-year amputation free survival was 70.5% ±2.5%. The 1-year amputation free survival was associated with body mass index (HR, 1.090; 95% CI, 1.020 €“1.164; p=0.012), non-ambulatory status (HR, 0.530; 95% CI, 0.343 €“0.818; p=0.004), low serum albumin level (HR, 1.692; 95% CI, 1.184 €“2.415; p=0.004), WIfI stage 4 (HR, 0.561; 95% CI, 0.364 €“0.865; p=0.009) and longer vintages for hemodialysis wit…					1	1	0	0	0	2
Honda Y, Hirano K, Yamawaki M, Mori S, Shirai S, Makino K et al. Wound healing of critical limb ischemia with tissue loss in patients on hemodialysis. Vascular. 2017;25(3):272-82. doi:10.1177/1708538116673015.	2017	Honda	Wound healing of critical limb ischemia with tissue loss in patients on hemodialysis	Assess the wound healing of critical limb ischemia (CLI) patients with tissue loss on hemodialysis (HD) who underwent endovascular therapy (EVT)	Japan	Inpatient (hospital) setting (other than dialysis)	Surgery	Endovsacular therapy and wound care at an outpatient foot care clinic of at a ward during hospitalization	2 years to less than 5 years	No	Prevention and management	Cohort study	Observational	2007	2014	Less than 75% (but 10 or more participants had ESRD and results for this specific group are available)	120	74.2	68	Haemodialysis	No	Combination of participants with and without diabetes	Wound healing rate at 2 years was 79.5%, with a median time to healing of 132 days. Wound recurrence rates (for each limb, same of different location) in patients who achieved complete wound healing was 57.9%.	Limb salvage at 2 years was 72.8%.		Post endovascular therapy, pedal loop patency was 49.1%. Repeat endovascular therapy was observed in 47.9%.			1	1	0	1	0	3
Hoshina K, Yamamoto K, Miyata T, Watanabe T. Outcomes of Critical Limb Ischemia in Hemodialysis Patients After Distal Bypass Surgery - Poor Limb Prognosis With Stage 4 Wound, Ischemia, and Foot Infection (WIfI). Circ J. 2016;80(11):2382-7. doi:10.1253/circj.CJ-16-0591.	2016	Hoshina	Outcomes of Critical Limb Ischemia in Hemodialysis Patients After Distal Bypass Surgery: Poor Limb Prognosis With Stage 4 Wound, Ischemia, and Foot Infection (WIfI)	Elucidate the recent outcomes of hemodialysis (HD) patients after distal bypass for critical limb ischemia (CLI) under multidisciplinary treatment in a tertiary high-volume center, from the life and the limb prognostic point of view	Japan	Inpatient (hospital) setting (other than dialysis)	Surgery	Bypass, multidisciplinary treatment and wound care	5 years or more	No	Prevention and management	Case control study	Observational	2005	2014	Less than 75% (but 10 or more participants had ESRD and results for this specific group are available)	73	75	66.7	Haemodialysis	No	Combination of participants with and without diabetes		Unable to extract data		Unable to extract data			0	1	0	1	0	2
Hoshino J, Fujimoto Y, Naruse Y, Hasegawa E, Suwabe T, Sawa N et al. Characteristics of revascularization treatment for arteriosclerosis obliterans in patients with and without hemodialysis. Circ J. 2010;74(11):2426-33. doi:10.1253/circj.cj-09-0910.	2010	Hoshino	Characteristics of Revascularization Treatment for Arteriosclerosis Obliterans in Patients With and Without Hemodialysis	Compare the outcomes between hemodialysis (HD) and non-HD patients, and reveal the characteristics of peripheral arterial disease treatments in HD patients by directly determining the outcome associated with bypass or percutaneous transluminal angioplasty (PTA).	Japan	Inpatient (hospital) setting (other than dialysis)	Surgery	Surgical bypass grafting and percutaneous transluminal angioplasty	5 years or more	Yes	Prevention and management	Cohort study	Observational	1999	2006	Less than 75% (but 10 or more participants had ESRD and results for this specific group are available)	41	80	63.3	Haemodialysis	No	Combination of participants with and without diabetes		Amputation-free survival at 1, 3, and 5 years were 68.3%, 53.3% and 40.0%. Significant predictors for amputation-free survival were diabetes mellitus (HR, 8.34 [95%CI, 1.91 €“46.98]) and gender (HR, 0.19 [95%CI, 0.06 €“0.63])., In the bypass group, amputation-free survival at 1, 3, and 5 years were 79.3%, 44.3%, and 14.8%. In the angioplasty group, however, amputation-free survivals at 1, 3, 5yea…		No major periprocedural complications were observed. , In the angioplasty group patency rates at 1, 3 and 5 years were 59.6%, 34.8% and 23.2%. In the bypass group primary patency rates at 1, 3 and 5 years were all 84.4%. , Predictors for patency rate were treatment method {bypass (referent, angioplasty) (HR, 0.18 [95%CI, 0.03 €“0.70], P=0.01)} and diabetes (HR, 4.22 [95%CI, 1.04 €“21.26], P=0.04).			0	1	0	1	0	2
Iida O, Soga Y, Hirano K, Kawasaki D, Suzuki K, Miyashita Y et al. Midterm Outcomes and Risk Stratification after Endovascular Therapy for Patients with Critical Limb Ischaemia due to Isolated Below-the-knee Lesions. Eur J Vasc Endovasc Surg. 2012;43(3):313-21. doi:10.1016/j.ejvs.2011.11.025.	2012	Iida	Midterm Outcomes and Risk Stratification after Endovascular Therapy for Patients with Critical Limb Ischaemia due to Isolated Below-the-knee Lesions	Investigate and risk-stratify endovascular therapy (EVT) midterm outcomes: namely, overall survival, limb salvage, and re-intervention, in patients with critical limb ischaemia (CLI) due to isolated below-the-knee (BTK) lesions.	Japan	Inpatient (hospital) setting (other than dialysis)	Surgery	Endovascular therapy by angioplasty	2 years to less than 5 years	No	Prevention and management	Cohort study	Observational	2004	2010	Less than 75% (but 10 or more participants had ESRD and results for this specific group are available)	242	48	63	Not reported	No	Presence or absence of diabetes not specified		50 patients (18%) required major amputation during follow up.		100 patients (35%) required reintervention during follow up.			0	1	0	1	0	2
Iida O, Takahara M, Soga Y, Yamauchi Y, Hirano K, Tazaki J et al. Worse Limb Prognosis for Indirect versus Direct Endovascular Revascularization only in Patients with Critical Limb Ischemia Complicated with Wound Infection and Diabetes Mellitus. Eur J Vasc Endovasc Surg. 2013;46(5):575-82. doi:10.1016/j.ejvs.2013.08.002.	2013	Iida	Worse Limb Prognosis for Indirect versus Direct Endovascular Revascularization only in Patients with Critical Limb Ischemia Complicated with Wound Infection and Diabetes Mellitus	Investigate factors in patients with critical limb ischemia (CLI) and isolated infrapopliteal lesions that adversely affect outcomes of endovascular therapy (EVT) with or without angiosome-oriented revascularization	Japan	Inpatient (hospital) setting (other than dialysis)	Surgery	Endovascular therapy and patients assessed for ischemic symptoms	1 year to less than 2 years	Yes	Prevention and management	Cohort study	Observational	Not reported	Not reported	Less than 75% (but 10 or more participants had ESRD and results for this specific group are available)	488	48	63	Haemodialysis	No	Presence or absence of diabetes not specified		Hazard ratios (95% CI) for major adverse limb events where there was: indirect endovascular therapy and C-reactive protein levels greater than or equal 3mg/dl, with no diabetes, was 0.66 (0.40-1.11); direct endovascular therapy and C-reactive protein levels less than 3mg/dl, with diabetes, was 1.08 (0.37-3.14); indirect endovascular therapy and C-reactive protein levels greater than or equal 3mg/…		Hazard ratios (95% CI) for major adverse limb events (major amputation or any reintervention including repeat angioplasty and surgical conversion) where there was: indirect endovascular therapy and C-reactive protein levels less than 3mg/dl was 1.04 (0.75-1.44); , direct endovascular therapy and C-reactive protein levels greater than or equal to 3mg/dl was 1.27 (0.88-1.83); indirect endovascular …			0	1	0	1	0	2
Imaoka S, Sato K, Furukawa M, Okita M, Higashi T. Re-amputation in patients with diabetes-related minor amputations who underwent physical therapy during their hospitalization. J Foot Ankle Res. 2021;14(1):14-. doi:10.1186/s13047-021-00454-y.	2021	Imaoka	Re-amputation in patients with diabetes-related minor amputations who underwent physical therapy during their hospitalization	To elucidate modifiable risk factors of re-amputation in patients with a history of minor amputations who received physical therapy during their hospitalization	Japan	Inpatient (hospital) setting (other than dialysis)	Rehabilitation	Physical therapy	6 months to less than 1 year	No	Prevention and management	Cohort study	Observational	2015	2018	Less than 75% (but 10 or more participants had ESRD and results for this specific group are available)	41	48	63	Haemodialysis	No	Presence or absence of diabetes not specified		19 hemodialysis patients (46%) experiences re-amputation.,					0	1	0	0	0	1
Ito R, Ishii H, Oshima S, Nakayama T, Takahashi H, Sakakibara T et al. Long‐term clinical outcomes after self‐expandable bare nitinol stent implantation for femoropopliteal occlusive disease in hemodialysis patients. Catheter Cardiovasc Interv. 2021;97(2):318-24. doi:10.1002/ccd.29372.	2021	Ito	Long-term clinical outcomes after self-expandable bare nitinol stent implantation for femoropopliteal occlusive disease in hemodialysis patients	To compare the long-term clinical outcomes after self-expandable barenitinol stent (BNS) implantation between hemodialysis (HD) and non-HD patients with femoropopliteal (FP) disease	Japan	Inpatient (hospital) setting (other than dialysis)	Surgery	Endovascular therapy with self-expandable barenitinol stent (BNS) implantation	5 years or more	No	Prevention and management	Cohort study	Observational	2006	2018	Less than 75% (but 10 or more participants had ESRD and results for this specific group are available)	427	69.8	70	Haemodialysis	No	Combination of participants with and without diabetes		The major amputations rate in the hemodialysis group was 7.2%.		The target lesion revascularization (TLR) rate at 5 year in the HD group was 45.2%.			0	1	0	1	0	2
Ito R, Yoshitaka K, Hideki I, Daisuke K, Takashi S, Norio U et al. Clinical Outcomes after Isolated Infrapopliteal Revascularization in Hemodialysis Patients with Critical Limb Ischemia : Endovascular Therapy versus Bypass Surgery. J Atheroscler Thromb. 2018;25(9):799-807.	2018	Ito	Clinical Outcomes after Isolated Infrapopliteal Revascularization in Hemodialysis Patients with Critical Limb Ischemia: Endovascular Therapy versus Bypass Surgery	To investigate the long-term clinical outcome of endovascular therapy (EVT) or bypass surgery in patients on hemodialysis (HD) with critical limb ischemia due to isolated infrapopliteal disease.	Japan	Inpatient (hospital) setting (other than dialysis)	Surgery	Endovascular and bypass surgery	5 years or more	Yes	Prevention and management	Cohort study	Observational	2006	2015	Equal to or greater than 75%	254	68.5	69	Haemodialysis	No	Combination of participants with and without diabetes		During follow-up 21 major amputations (5 in the endovascular therapy (EVT) group and 16 in the bypass group) occurred., Amputation free survival (freedom from amputation above the ankle or any-cause death) rate at 5 years was comparable (60.8% in the EVT group vs. 54.3% in the bypass group, HR 0.87, 95% CI 0.55 €“1.37, p=0.55) between groups. , After adjustment by propensity score, the rates of A…		During follow-up 60 reinterventions (44 in the endovascular therapy (EVT) group and 16 in the bypass group) occurred. Freedom from any reintervention was markedly lower in the EVT than in the bypass group (47.4% vs. 85.2%, HR 3.79, 95% CI 2.17 €“6.96, pï¼œ0.0001)., After adjustments by propensity score freedom from any re-intervention was significantly lower in the EVT than in the bypass group, a…			0	1	0	1	0	2
Jaar BG, Astor BC, Berns JS, Powe NR. Predictors of amputation and survival following lower extremity revascularization in hemodialysis patients. Kidney Int. 2004;65(2):613-20. doi:10.1111/j.1523-1755.2004.00420.x.	2004	Jaar	Predictors of amputation and survival following lower extremity revascularization in hemodialysis patients	Describe outcomes of primary lower extremity revascularization for peripheral vascular disease (PVD) in a representative sample of the United States hemodialysis population	United States of America	Inpatient (hospital) setting (other than dialysis)	Surgery	Bypass surgery and Angioplasty	2 years to less than 5 years	Yes	Prevention and management	Cohort study	Observational	1995	1997	Equal to or greater than 75%	13942	51.9	61.5	Haemodialysis	Yes	Combination of participants with and without diabetes		Among the 508 patients who underwent a primary revascularization by bypass, 120 of them had a subsequent amputation, with a median time of 86 days between the two procedures. Among the 292 patients who underwent a primary revascularization by angioplasty, only 18 of them had a subsequent amputation, with a median time of 106 days between the two procedures., Follow-up identified 138 patients unde…		Following a primary revascularization by surgical bypass, 186 (36.6%) patients had subsequent peripheral vascular disease (PVD) related procedures, including 86 repeat bypasses, 25 angioplasty procedures, and 120 amputations. , Following a primary revascularization by angioplasty, 54 (18.5%) patients had subsequent PVD related procedures, including 33 repeat angioplasty procedures, 12 bypasses an…			0	1	0	1	0	2
Johnson BL, Glickman MH, Bandyk DF, Esses GE. Failure of foot salvage in patients with end-stage renal disease after surgical revascularization. J Vasc Surg. 1995;22(3):280-6. doi:10.1016/S0741-5214(95)70142-7.	1995	Johnson	Failure of foot salvage in patients with end-stage renal disease after surgical revascularization	Ascertain factors responsible for failure of foot salvage in patients with end-stage renal disease (ESRD) after undergoing infrainguinal bypass for critical ischemia	United States of America	Inpatient (hospital) setting (other than dialysis)	Surgery	Infrainguinal bypass graft	2 years to less than 5 years	No	Prevention and management	Case series	Observational	1983	1994	Equal to or greater than 75%	53	50.9	59	Haemodialysis and peritoneal dialysis	Yes	Combination of participants with and without diabetes		22 amputation were required during >24month follow up. Where amputation was required, 13 bypass grafts remained patent while 9 had thrombosed., Cumulative limb salvage was 57% after 30 months. , Only two of seven patients admitted with forefoot gangrene experienced foot salvage.		Postoperative wound complications developed in 20 (29%) limbs and included dehiscence as a result of dermal necrosis (n = 10), infection (n = 6), hematoma (n = 3), and seroma (n = 1). Two wound infections involved the bypass graft and required ligation followed by limb amputation. , Cumulative graft patency was 96% at 1 month, 72% at 1 year and 63% at 2 years and 30 months., Graft thrombosis occu…			0	1	0	1	0	2
Jujo K, Saito K, Ishida I, Furuki Y, Shibahashi E, Shimazaki K et al. Pilot Cohort Study Assessing the Efficacy of Endovascular Revascularization in the Restoration of Peripheral Sensory Disturbance in Patients With Critical Limb Ischemia. Circ J. 2017;81(12):1919-26. doi:10.1253/circj.CJ-17-0405.	2017	Jujo	Pilot Cohort Study Assessing the Efficacy of Endovascular Revascularization in the Restoration of Peripheral Sensory Disturbance in Patients With Critical Limb Ischemia	Determine whether endovascular revascularization (EVR) induces quantifiable changes in SD in chronic critical limb ischemia (CLI) patients with neuropathy	Japan	Inpatient (hospital) setting (other than dialysis)	Surgery	Endovascular revascularisation (EVR)	Less than 6 months	Yes	Management	Cohort study	Observational	2012	2014	Less than 75% (but 10 or more participants had ESRD and results for this specific group are available)	15	67	67	Haemodialysis	No	Combination of participants with and without diabetes				Ankle-brachial index (ABI) did not change significantly after endovascular revascularisation.			0	0	0	1	0	1
Kalra M, Gloviczki P, Bower TC, Panneton JM, Harmsen WS, Jenkins GD et al. Limb salvage after successful pedal bypass grafting is associated with improved long-term survival. J Vasc Surg. 2001;33(1):6-16. doi:10.1067/mva.2001.112300.	2001	Kalra	Limb salvage after successful pedal bypass grafting is associated with improved long-term survival	Identify factors affecting long-term clinical outcome and survival after pedal bypass grafting	United States of America	Inpatient (hospital) setting (other than dialysis)	Surgery	Pedal bypass graft	5 years or more	No	Prevention and management	Cohort study	Observational	1987	1998	Less than 75% (but 10 or more participants had ESRD and results for this specific group are available)	19	48	63	Not reported	Yes	Presence or absence of diabetes not specified		5 patients (26%) underwent amputation with patent graft, for ongoing foot infection and osteomyelitis. , At 5-years cumulative limb salvage was 41%.		At 5-years cumulative patency was 52% and secondary patency was 70%.			0	1	0	1	0	2
Karanikolas M, Aretha D, Kiekkas P, Monantera G, Tsolakis I, Filos KS. Intravenous fentanyl patient‐controlled analgesia for perioperative treatment of neuropathic/ischaemic pain in haemodialysis patients: a case series. J Clin Pharm Ther. 2010;35(5):603-8. doi:10.1111/j.1365-2710.2009.01114.x.	2010	Karanikolas	Intravenous fentanyl patient-controlled analgesia for perioperative treatment of neuropathic/ischaemic pain in haemodialysis patients: a case series	Experience of peri-operative intravenous (IV) fentanyl patient-controlled analgesia (PCA) for severe neuropathic and „or ischaemic pain in the lower extremities in haemodialysis patients scheduled for major lower extremity amputation	Greece	Inpatient (hospital) setting (other than dialysis)	Medication	Intravenous (IV) fentanyl patient-controlled analgesia (PCA) was used to relieve severe lower extremity ischaemic and „or neuropathic pain	Less than 6 months	No	Management	Case series	Observational	Not reported	Not reported	Equal to or greater than 75%	16	81	62	Haemodialysis	No	Presence or absence of diabetes not specified		After amputation, 10 of 15 patients experienced phantom pain, which was low Visual Analogue Scale (VAS ‰¤ 40) . Out of the eight patients who received Intravenous (IV) fentanyl Patient-controlled analgesia (PCA) after amputation, six experienced phantom pain; mean Visual Analogue Scale and PRI(R) phantom pain scores were 23:70 ± 16:40 and 7.87 ± 7.01 respectively.		All patients experienced significant pain relief with intravenous (IV) fentanyl PCA (P<0.001)., Mean visual analogue scale (VAS) and total ranked pain rating index (PRI(R)) score was 84.31 ± 15.43 and 29.12 ± 10.36 respectively before starting PCA, but decreased to 21.81 ± 13.82 and 6.62 ± 5.58 respectively 24 h after PCA started (P<0.001). VAS at 8, 16, 24 and 48 hours were significantly decreas…			0	1	0	1	0	2
Kataoka S, Yamaguchi J, Nakao M, Jujo K, Hagiwara N. Clinical outcome and its predictors in hemodialysis patients with critical limb ischemia undergoing endovascular therapy. J Interv Cardiol. 2017;30(4):374-81. doi:10.1111/joic.12393.	2017	Kataoka	Clinical outcome and its predictors in hemodialysis patients with critical limb ischemia undergoing endovascular therapy	Examine prognosis and causes of death in hemodialysis (HD) patients with critical limb ischemia (CLI) after endovascular therapy (EVT)	Japan	Inpatient (hospital) setting (other than dialysis)	Surgery	Endovascular therapy	2 years to less than 5 years	Yes	Prevention and management	Non-randomised controlled study	Experimental	2009	2014	Less than 75% (but 10 or more participants had ESRD and results for this specific group are available)	126	76	67.3	Haemodialysis	Yes	Combination of participants with and without diabetes		Major amputation rates at 1-year were 6.5%, 2-years were 14.1% and 3-years were 20.6%. , Lower serum albumin (HR = 0.44, 95% CI = 0.22-0.92, P= 0.03) and currently smoking (HR = 4.73, 95% CI = 1.43-14.1, P= 0.01) were independent predictors of major amputation.		Re-intervention rates at 1-year were 15.7%, 2-years were 34.0% and 3-years were 40.3%. , There were no independent predictors of re-intervention.			0	1	0	1	0	2
Kaushal A, Roche-Nagle G, Tan KT, Liao E, Eisenberg N, Oreopoulos GD et al. Outcomes at a single center after subintimal arterial flossing with antegrade-retrograde intervention for critical limb ischemia. J Vasc Surg. 2018;67(5):1448-54. doi:10.1016/j.jvs.2017.08.091.	2018	Kaushal	Outcomes at a single center after subintimal arterial flossing with antegrade-retrograde intervention for critical limb ischemia	Evaluate outcomes for subintimal arterial flossing with antegrade-retrograde intervention technique to overcome antegrade recanalization failures for peripheral lower limb arterial occlusive disease over a 7-year period	Canada	Inpatient (hospital) setting (other than dialysis)	Surgery	Subintimal arterial flossing with antegrade-retrograde intervention	6 months to less than 1 year	No	Management	Cohort study	Observational	2009	2016	Less than 75% (but 10 or more participants had ESRD and results for this specific group are available)	19	48	63	Not reported	No	Presence or absence of diabetes not specified				After subintimal arterial flossing with antegrade-retrograde intervention (SAFARI) 5 patients (26%) achieved primary patency, 4 (21%) achieved primary assisted patency and 3 (16%) experienced ongoing occlusion.			0	0	0	1	0	1
Kawamura A, Horie T, Tsuda I, Ikeda A, Egawa H, Imamura E et al. Prevention of Limb Amputation in Patients with Limbs Ulcers by Autologous Peripheral Blood Mononuclear Cell Implantation. Ther Apher Dial. 2005;9(1):59-63. doi:10.1111/j.1774-9987.2005.00218.x.	2005	Kawamura	Prevention of limb amputation in patients with limb ulcers by autologous peripheral blood mononuclear cell implantation	Monitor outcomes for patients with ischemic limbs who were treated by autologous peripheral blood stem cell (PBSC) implantation, where imminent amputation was under consideration	Japan	Not reported	Other	Autologous peripheral bloodstem cell (PBSC) implantation	1 year to less than 2 years	No	Prevention and management	Non-randomised controlled study	Experimental	Not reported	Not reported	Equal to or greater than 75%	23	48	63	Not reported	No	Combination of participants with and without diabetes		We were able to save 22 (73%) ischemic limbs.		In 21 cases (70%), normalization of limb temperature was observed by thermograph, and symptoms also improved.			0	1	0	1	0	2
Kawarada O, Yokoi Y, Higashimori A, Fujihara M, Sakamoto S, Ishihara M et al. Impact of end-stage renal disease in patients with critical limb ischaemia undergoing infrapopliteal intervention. EuroIntervention. 2014;10(6):753-60. doi:10.4244/eijv10i6a129.	2014	Kawarada	Impact of end-stage renal disease in patients with critical limb ischemia undergoing infrapopliteal intervention	Investigate the impact of end-stage renal disease (ESRD) on clinical outcomes following infrapopliteal intervention in critical limb ischaemia patients with tissue loss	Japan	Inpatient (hospital) setting (other than dialysis)	Surgery	Infrapopliteal endovascular intervention	5 years or more	No	Prevention and management	Cohort study	Observational	2002	2011	Less than 75% (but 10 or more participants had ESRD and results for this specific group are available)	49	78	65	Haemodialysis	No	Combination of participants with and without diabetes	Wound healing rate was 49.1% at 6 months, 66.7% at 12 months.	In addition to revascularisation, 46% of patients required debridement or minor amputation. , Limb salvage rates were 98.1% at 6 months, 93.0% at 12 months, 82.7% at 24 months and 60 months.		Procedural success was achieved for 87.7% of patients. , Reintervention rates were 10.8% at 1 month, 32.8% at 3 months, 56.1% at 6 months and 9 months, 58.8% at 12 months.			1	1	0	1	0	3
Kimura H, Miyata T, Sato O, Furuya T, Iyori K, Shigematsu H. Infrainguinal arterial reconstruction for limb salvage in patients with end-stage renal disease. Eur J Vasc Endovasc Surg. 2003;25(1):29-34. doi:10.1053/ejvs.2002.1767.	2003	Kimura	Infrainguinal Arterial Reconstruction for Limb Salvage in Patients with End-stage Renal Disease	To evaluate the efficacy of infrainguinal bypass for limb-threatening ischaemia in patients with end-stage renal disease (ESRD)	Japan	Inpatient (hospital) setting (other than dialysis)	Surgery	Infrainguinal bypass	2 years to less than 5 years	No	Prevention and management	Cohort study	Observational	1991	2000	Less than 75% (but 10 or more participants had ESRD and results for this specific group are available)	22	81.8	63	Haemodialysis	Yes	Combination of participants with and without diabetes		Major amputation was performed in the perioperative period in two patients (9%)., Ipsilateral major amputations were required in three patients the follow-up period later than 30 days after revascularization. The cumulative limb salvage rate at 2 years was 83%.		Twelve patients (55%) had systemic or local complications., Nine grafts (27%) failed during the follow-up period. Cumulative primary and secondary graft patency at 2 years were 75% and 83%.			0	1	0	1	0	2
King RW, Malas MB, Brothers TE. Outcomes for peripheral vascular intervention and lower extremity bypass in kidney transplant recipients are superior to outcomes of patients remaining on dialysis. J Vasc Surg. 2019;69(6):1849-62.e6. doi:10.1016/j.jvs.2018.10.060.	2019	King	Outcomes for peripheral vascular intervention and lower extremity bypass in kidney transplant recipients are superior to outcomes of patients remaining on dialysis	Compare peripheral vascular intervention (PVI) and lower extremity bypass (LEB) amputation-free survival (AFS) and freedom from major adverse limb events (MALEs) as well as their component elements of limb salvage, assisted primary patency, and patient survival between dialysis-dependent patients (DDPs) and kidney transplant recipients (KTRs)	Multiple countries	Inpatient (hospital) setting (other than dialysis)	Surgery	Infrainguinal peripheral vascular intervention (PVI) or lower extremity bypass (LEB)	5 years or more	No	Prevention and management	Cohort study	Observational	2003	2017	Equal to or greater than 75%	2356	61	65	Haemodialysis and peritoneal dialysis	Yes	Combination of participants with and without diabetes		Amputation free survival (AFS) after PVI for dialysis-dependent patients (DDP) at 1 year and 2 years was 42% ± 1% and 15% ± 2%, respectively. Freedom from major adverse limb events (MALEs) after PVI for DDPs at 1 year and 18 months was 53% ± 2% and 35% ± 3%, respectively. , , AFS after lower extremity bypass (LEB) for DDPs at 1 year and 2 years was 44% ± 2% and 21% ± 2%, respectively. Freedom fro…		For peripheral vascular intervention patients: Freedom from major adverse limb events (MALEs) was 53% at 1 year 35% at 18 months. , Assisted primary patency was 71% at 1 year. , , For lower extremity bypass patients: Freedom from major adverse limb events (MALEs) was 58% at 1 year. , Assisted primary patency was 71% at 1 year and 63% at 18 months.			0	1	0	1	0	2
Kobayashi N, Hirano K, Nakano M, Muramatsu T, Tsukahara R, Ito Y et al. Predictors of non-healing in patients with critical limb ischemia and tissue loss following successful endovascular therapy. Catheter Cardiovasc Interv. 2015;85(5):850-8. doi:10.1002/ccd.25625.	2015	Kobayashi	Predictors of Non-Healing in Patients with Critical Limb Ischemia and Tissue Loss Following Successful Endovascular Therapy	Evaluate the predictors of non-healing in patients with critical limb ischemia (CLI) and tissue loss after successful endovascular therapy (EVT)	Japan	Inpatient (hospital) setting (other than dialysis)	Surgery	Endovascular therapy (EVT) and all patients were followed-up at outpatient footcare clinic once or twice a week.	1 year to less than 2 years	No	Management	Cohort study	Observational	2007	2012	Less than 75% (but 10 or more participants had ESRD and results for this specific group are available)	52	48	63	Haemodialysis	No	Presence or absence of diabetes not specified	Wound healing was achieved by 30 patients (58%)						1	0	0	0	0	1
Kobayashi N, Yamawaki M, Mori S, Tsutsumi M, Honda Y, Makino K et al. Scoring Model to Predict Major Amputation in Patients With Chronic Limb-Threatening Ischemia at Wound, Ischemia, and Foot Infection Clinical Stage 4 After Endovascular Therapy. J Endovasc Ther. 2022;29(4):594-601. doi:10.1177/15266028211059453.	2022	Kobayashi	Scoring Model to Predict Major Amputation in Patients With Chronic Limb-Threatening Ischemia at Wound, Ischemia, and Foot Infection Clinical Stage 4 After Endovascular Therapy	Investigate the predictors of major amputation (MA) at 1 year and prepared a scoring model to stratify the clinical outcomes of chronic limb-threatening ischemia (CLTI) patients at wound, ischemia, and foot infection (WIfI) clinical stage 4 after endovascular therapy (EVT)	Japan	Inpatient (hospital) setting (other than dialysis)	Surgery	Endovascular therapy	1 year to less than 2 years	No	Prevention and management	Cohort study	Observational	2007	2016	Less than 75% (but 10 or more participants had ESRD and results for this specific group are available)	90	48	63	Haemodialysis	No	Presence or absence of diabetes not specified		Major amputation free rate at 1 year was 65.8%.					0	1	0	0	0	1
Koch M, Trapp R, Hepp W. Impact of femoropopliteal bypass surgery on the survival and amputation rate of end-stage renal disease patients with critical limb ischemia. Med Klin (Munich). 2007;102(2):107-11. doi:10.1007/s00063-007-1021-8.	2007	Koch	Impact of Femoropopliteal Bypass Surgery on the Survival and Amputation Rate of End €‘Stage Renal Disease Patients with Critical Limb Ischemia	Investigate the survival rate of ESRD patients with foot ulcers who underwent femoropopliteal bypass surgery versus patients who did not receive any major surgical interventions	Germany	Inpatient (hospital) setting (other than dialysis)	Surgery	Bypass surgery versus angioplasty, local surgical procedures with or without minor amputation	5 years or more	Yes	Prevention and management	Non-randomised controlled study	Experimental	1997	2005	Equal to or greater than 75%	99	72	67	Not reported	No	Combination of participants with and without diabetes	Median time from ulcer diagnosis to bypass surgery was 0.36 years [range, 0 €“2.65 years].	27 subjects underwent bypass surgery and major amputation after this surgery occurred in six cases (22.2%)., 72 subjects did not meet the criteria for bypass surgery and major amputation occurred in 25 cases (34.7%)., In the bypass group, the median time from ulcer diagnosis to major amputation was 2.3 years (range, 0.2 €“9.1 years) versus 1.1 years (range, 0.1 €“10 years) in the non €‘bypass gro…					1	1	0	0	0	2
Korn P, Hoenig SJ, Skillman JJ, Kent KC. Is lower extremity revascularization worthwhile in patients with end-stage renal disease? Surgery. 2000;128(3):472-9. doi:10.1067/msy.2000.108049.	2000	Korn	Is lower extremity revascularization worthwhile in patients with end-stage renal disease?	Review the results of lower extremity revascularization in patients with end-stage renal disease and to determine in these patients the functional benefit and cost of an aggressive approach to limb preservation	United States of America	Inpatient (hospital) setting (other than dialysis)	Surgery	Bypass	2 years to less than 5 years	No	Prevention and management	Cohort study	Observational	1992	1997	Equal to or greater than 75%	23	57	67	Haemodialysis and peritoneal dialysis	No	Combination of participants with and without diabetes		At 1 and 2 years, cumulative limb salvage rates were 67% and 59%, respectively. Ten patients underwent major amputation.Three required amputation within the first month after revascularization for ascending cellulitis and sepsis despite patent grafts (30-day limb salvage, 90%). Of the 31 limbs revascularized, 55% required digital or transmetatarsal amputations during the life of the limb. , xtens…	Progressive infection in the foot was observed in 27% of the limbs (9 of 33)	Wound infections requiring antibiotics or debridement occurred in 39% (13 of 33)., There were no perioperative vein graft thromboses (100% primary patency at 30 days). At1 year, primary, assisted primary and secondary graft patency was 65%, 77% and 79%, respectively. These numbers were identical at year 2. Within the first 6 months, hemodynamically significant stenoses (defined as a tripling in v…			0	1	1	1	0	3
Korzets A, Ori Y, Rathaus M, Plotnik N, Baytner S, Gafter U et al. Lower extremity amputations in chronically dialysed patients: a 10 year study. Isr Med Assoc J. 2003;5(7):501-5.	2003	Korzets	Lower extremity amputations in chronically dialysed patients: A 10 year study	Evaluate the results of revascularization procedures, amputations and prosthetic rehabilitation in dialysed amputees	Israel	Rehabilitation unit	Surgery	Underwent either a below-knee or above-knee amputation, and admitted for prosthetic rehabilitation	1 year to less than 2 years	No	Management	Cohort study	Observational	1990	1999	Equal to or greater than 75%	24	88	59	Haemodialysis and peritoneal dialysis	No	Combination of participants with and without diabetes		In all patients amputation led to a marked relief of pain. , Twelve patients were considered to be successfully rehabilitated, 8 patients had partial success in the prosthetic rehabilitation program, while 4 patients failed rehabilitation., A younger age confirmed favorable rehabilitation results, while patients with long-standing diabetes were poor candidates for rehabilitation. , Seven patients…		In 11 patients bilateral ankle-brachial index examinations were carried out 12 months or less before amputation. Of the 22 limbs examined, 14 were eventually amputated. Of these 14 limbs, 9 limbs had falsely elevated (>1.0) values of ABPT. The ABPI in only five patients showed results indicative of severe PVD. Eight of the 11 patients were subsequently investigated with digital subtraction angiog…	Hospitalization stay for rehabilitation was 67 +/-39 days.		0	1	0	1	1	3
Kumada Y, Aoyama T, Ishii H, Tanaka M, Kawamura Y, Takahashi H et al. Long-term outcome of percutaneous transluminal angioplasty in chronic haemodialysis patients with peripheral arterial disease. Nephrol Dial Transplant. 2008;23(12):3996-4001. doi:10.1093/ndt/gfn378.	2008	Kumada	Long-term outcome of percutaneous transluminal angioplastyin chronic haemodialysis patients with peripheral arterial disease	Clarify the long-term outcome of percutaneous transluminal angioplasty (PTA) as a primary treatment for PAD in haemodialysis patients	Japan	Inpatient (hospital) setting (other than dialysis)	Surgery	percutaneous transluminal angioplasty (PTA)	2 years to less than 5 years	No	Prevention and management	Cohort study	Observational	1998	2002	Less than 75% (but 10 or more participants had ESRD and results for this specific group are available)	118	57.6	64	Haemodialysis	No	Combination of participants with and without diabetes		Thirteen dialysis patients underwent amputation (8 above-knee and 5 below-knee)., 5-year limb salvage rate was 85%. , For amputation the independent predictors were Trans At-lantic Inter-Society Consensus (TASC) C+D lesion (HR 8.40, 95% CI 3.13 €“22.64, P=0.031) and ulceration/gangrene (HR 17.24, 95% CI5.89 €“51.36, P=0.0084)		Haematoma and/or mi-nor bleeding occurred in two patients and one patient had distal embolization. , At 3 months after the PTA procedure, ankle brachial index (ABI) markedly increased from 0.61 ±0.31 to 0.88 ±0.24. , 5-year primary patency rate was 51.7%., For restenosis after PTA, the independent predictors were age (HR 1.02,95% CI 1.01 €“1.04, P=0.027), Trans At-lantic Inter-Society Consensus (…	No major complication requiring hospitalization occurred		0	1	0	1	1	3
Kumada Y, Kawai N, Ishida N, Mori A, Ishii H, Ohshima S et al. Impact of Hemodialysis on Clinical Outcomes in Patients Undergoing Lower Extremity Bypass Surgery for Peripheral Artery Disease—10-year Follow-Up Study. Angiology. 2022;73(8):744-52. doi:10.1177/00033197211070882.	2022	Kumada	Impact of Hemodialysis on Clinical Outcomes in Patients Undergoing Lower Extremity Bypass Surgery for Peripheral Artery Disease --10-year Follow-Up Study	Investigate the impact of hemodialysis status after lower extremity bypass surgery in patients with Peripheral Arterial Disease	Japan	Inpatient (hospital) setting (other than dialysis)	Surgery	Lower Extremity Bypass surgery	5 years or more	No	Prevention and management	Cohort study	Observational	2006	2017	Less than 75% (but 10 or more participants had ESRD and results for this specific group are available)	392	70.3	67	Haemodialysis	No	Combination of participants with and without diabetes		During the follow-up period 53 amputations occurred (13.5%). Among patients with critical limb ischemia during the follow-up period 53 amputations occurred (17.4%).		The cumulative incidence of revascularization for 10 years was 21.2%. Among patients with critical limb ischemia the cumulative incidence of revascularization for 10 years was 24.2%.			0	1	0	1	0	2
Kumada YMDP, Ishii HMDP, Aoyama TMDP, Kamoi DMD, Sakakibara TMD, Umemoto NMD et al. Bypass Surgery Versus Endovascular Therapy in Chronic Hemodialysis Patients With CLI Due to Infrainguinal Disease. J Am Coll Cardiol. 2016;68(14):1601-2. doi:10.1016/j.jacc.2016.07.736.	2016	Kumada	Bypass Surgery Versus Endovascular Therapy in Chronic Hemodialysis Patients With CLI Due to Infrainguinal Disease	Investigate long-term clinical outcomes after bypass surgery or endovascular therapy (EVT) in hemodialysis (HD) patients with critical limb ischemia (CLI) due to infrainguinal disease	Japan	Inpatient (hospital) setting (other than dialysis)	Surgery	Bypass surgery and endovascular therapy	5 years or more	Yes	Prevention and management	Cohort study	Observational	Not reported	Not reported	Equal to or greater than 75%	566	48	63	Haemodialysis	No	Presence or absence of diabetes not specified		The cumulative incidence rate of amputation or death at 5 and 8 years were 48.6% and 52.9% in the bypass group, and 52.9% and 64.2% in the EVT group, respectively (p=0.30)		The incidence rate of revascularization was lower in the bypass group than in the EVT group (18.1% vs. 47.7% at 5 years and 21.5% vs. 51.7% at 8 years; p<0.0001)			0	1	0	1	0	2
Kumada YMDP, Nogaki HMDP, Ishii HMDP, Aoyama TMDP, Kamoi DMDP, Takahashi HB et al. Clinical outcome after infrapopliteal bypass surgery in chronic hemodialysis patients with critical limb ischemia. J Vasc Surg. 2015;61(2):400-4. doi:10.1016/j.jvs.2014.09.007.	2015	Kumada	Clinical outcome after infrapopliteal bypass surgery in chronic hemodialysis patients with critical limb ischemia	Investigate the limb salvage rate after infrapopliteal bypass surgery in hemodialysis (HD) patients with critical limb ischemia (CLI)	Japan	Inpatient (hospital) setting (other than dialysis)	Surgery	Infrapopliteal bypass surgery	5 years or more	No	Prevention and management	Cohort study	Observational	2006	2013	Equal to or greater than 75%	177	75	67	Haemodialysis	No	Combination of participants with and without diabetes		31 patients (17.5%) needed a major amputation. The 5-year freedom from amputation was 72.4%. , BMI (adjusted HR, 0.86; 95% CI,0.76-0.96 per 1-kg/m2 increase; P=.014) and serum CRP (adjusted HR, 1.06; 95% CI, 1.01-1.11; P=.014)were identified as independent predictors for major amputation.		22 patients (12.4%) underwent reintervention.			0	1	0	1	0	2
Kuusela JMD, Manninen HIMDP, Karhapää PMDP. Infrapopliteal Balloon Angioplasty for Chronic Critical Limb Ischemia in Diabetic Patients with Uremia: When is it Worth the Effort? J Vasc Interv Radiol. 2009;20(3):342-6. doi:10.1016/j.jvir.2008.11.022.	2009	Kuusela	Infrapopliteal Balloon Angioplasty for Chronic Critical Limb Ischemia in Diabetic Patients with Uremia: When is it Worth the Effort?	Assess the utility of infrapopliteal percutaneous transluminal angioplasty (PTA) in diabetic patients with end-stage renal disease and chronic critical limb ischemia	Finland	Inpatient (hospital) setting (other than dialysis)	Surgery	Infrapopliteal percutaneous transluminal angioplasty (PTA)	1 year to less than 2 years	No	Prevention and management	Cohort study	Observational	1994	2003	Equal to or greater than 75%	20	65	59	Haemodialysis and peritoneal dialysis	No	All had diabetes		The rates of major amputations at 3, 6,and 12 months were 23%, 31%, and 35%, respectively. Statistically, there was a trend toward increased frequency of major amputation among patients treated for more severe ischemia (rest pain vs ulcer vs gangrene, P= 0.10).		Immediate angiographic success was achieved in 22 of the 26 limbs (85%). After the intervention, there was at least one patent artery to the malleolar level in 18 of the 26 limbs (69%). There was one major complication (puncture site hematoma necessitating surgery)., Primary clinical success was achieved in nine of the 26 limbs (35%). Primary clinical success was achieved in eight of the 18 limbs…			0	1	0	1	0	2
Landry GJ, Silverman DA, Liem TK, Mitchell EL, Moneta GL. Predictors of Healing and Functional Outcome Following Transmetatarsal Amputations. Arch Surg (1960). 2011;146(9):1005-9. doi:10.1001/archsurg.2011.206.	2011	Landry	Predictors of Healing and Functional Outcome Following Transmetatarsal Amputations	Evaluate factors that predict healing and to assess functional outcome and survival following trans-metatarsal amputations (TMAs) for forefoot gangrene	United States of America	Inpatient (hospital) setting (other than dialysis)	Surgery	Transmetatarsal amputation	5 years or more	No	Management	Case control study	Observational	2004	2010	Less than 75% (but 10 or more participants had ESRD and results for this specific group are available)	31	48	63	Not reported	No	Presence or absence of diabetes not specified		7 (37%) transmetatarsal amputations achieved healing, while 12 (63%) did not.					0	1	0	0	0	1
Lantis JC, Conte MS, Belkin M, Whittemore AD, Mannick JA, Donaldson MC. Infrainguinal bypass grafting in patients with end-stage renal disease: Improving outcomes? J Vasc Surg. 2001;33(6):1171-8. doi:10.1067/mva.2001.115607.	2001	Lantis	Infrainguinal bypass grafting in patients with end-stage renal disease: Improving outcomes?	Examine recent trends in the outcomes of patients with end-stage renal disease(ESRD) undergoing infrainguinal bypass grafting (IBG) with autogenous vein	United States of America	Inpatient (hospital) setting (other than dialysis)	Surgery	Infrainguinal bypass grafting (IBG)	2 years to less than 5 years	No	Prevention and management	Cohort study	Observational	1993	1999	Less than 75% (but 10 or more participants had ESRD and results for this specific group are available)	60	46	63	Haemodialysis and peritoneal dialysis	No	Combination of participants with and without diabetes		Within 30 days 3% experienced amputation. , Four-year cumulative limb salvage was 77% +/- 6%. , Nine major amputations were performed despite functioning infrainguinal bypass graft (IBG). Seven other major amputations were performed after graft failure. , All four patients who presented with wet gangrene or soft eschars of the heel more than 4cm went on to amputation despite a patent bypass graft…		Within 30 days 3% experienced graft occlusion and 4% experienced wound infection. , Reconstructions in the ESRD group demonstrated 4-yearpatency rates of 60% ± 11% (primary), 86% ± 5% (assisted primary), and 86% ± 5% (secondary). , Angiographic runoff scores were not predictive of graft patency			0	1	0	1	0	2
Leers SA, Reifsnyder T, Delmonte R, Caron M. Realistic expectations for pedal bypass grafts in patients with end-stage renal disease. J Vasc Surg. 1998;28(6):976-83. doi:10.1016/S0741-5214(98)70023-0.	1998	Leers	Realistic expectations for pedal bypass grafts in patients with end-stage renal disease	Investigate outcomes for patients with ESRD who require pedal bypass grafts for attempted limb salvage	United States of America	Inpatient (hospital) setting (other than dialysis)	Surgery	Bypass grafting	5 years or more	No	Prevention and management	Cohort study	Observational	1990	1997	Equal to or greater than 75%	34	59	64	Haemodialysis and peritoneal dialysis	Yes	Combination of participants with and without diabetes	All the patients who were seen with heel gangrene had early limb loss or died	At the time of the study closure, 16 limbs(39%) had been amputated --3 (19%) above-knee and13 (81%) below-knee., Seven amputations (44%) were performed with a patent bypass graft, and 2 (13%) were performed after the ligation of bypass grafts for rupture caused by infection. All the amputations with patent bypass grafts resulted from an inability to heal wounds and a continued sepsis, rather than…		Ankle Brachial Index (ABI) values (0.48 to 1.05) and the Toe Pressure (TP) values (18 to 86) were significantly improved after bypass grafting (P< .05). , Although 21 patients (62%) remained ambulatory, only 11 (32%) walked without assistance after bypass grafting. , The cumulative assisted primary patency rate was 62% at 1 and 2 years.			1	1	0	1	0	3
Lim K, Lim X, Hong Q, Yong E, Chandrasekar S, Tan GWL et al. Use of home negative pressure wound therapy in peripheral artery disease and diabetic limb salvage. Int Wound J. 2020;17(3):531-9. doi:10.1111/iwj.13307.	2020	Lim	Use of home negative pressure wound therapy in peripheral artery disease and diabetic limb salvage	To review the use and outcomes of home Negative Pressure Wound Therapy (NPWT) in Peripheral Artery Disease (PAD) and Diabetic Limb Salvage (DLS)	Singapore	Inpatient (hospital) setting (other than dialysis)	Other	Negative pressure wound therapy	1 year to less than 2 years	No	Management	Cohort study	Observational	2017	2017	Less than 75% (but 10 or more participants had ESRD and results for this specific group are available)	25	48	63	Not reported	No	Presence or absence of diabetes not specified	9 wounds (36%) healed.						1	0	0	0	0	1
Lin T-Y, Chou H-H, Huang H-L, Hung S-C. Indoxyl Sulfate and Incident Peripheral Artery Disease in Hemodialysis Patients. Toxins (Basel). 2020;12(11):696. doi:10.3390/toxins12110696.	2020	Lin	Indoxyl Sulfate and Incident Peripheral Artery Disease in Hemodialysis Patients	Examine associations between indoxyl sulfate and incident symptomatic lower extremity peripheral artery disease (PAD) events as well as major adverse cardiovascular events (MACE) and all-cause mortality in hemodialysis patients	Taiwan	Not reported	Other	Indoxyl sulfate levels	5 years or more	No	Prevention	Cohort study	Observational	2008	2020	Equal to or greater than 75%	234	54.7	63	Haemodialysis	No	Combination of participants with and without diabetes				37 patients (18.5%) experienced incident symptomatic PAD. After adjusting for traditional risk factors for PAD (age, current smoking, diabetes, and cardiovascular disease), indoxyl sulfate was significantly associated with the risk of PAD (hazard ratio(HR), 1.19 for every 10-ug/mL increase in indoxyl sulfate; 95% confidence interval (CI), 1.05 €“1.35).			0	0	0	1	0	1
Lipscombe J, Jassal SV, Bailey S, Bargman JM, Vas S, Oreopoulos DG. Chiropody may prevent amputations in diabetic patients on peritoneal dialysis. Perit Dial Int. 2003;23(3):255-9. doi:10.1177/089686080302300307.	2003	Lipscombe	CHIROPODY MAY PREVENT AMPUTATIONS IN DIABETICPATIENTS ON PERITONEAL DIALYSIS	Determine whether the institution of a chiropody program would result in fewer amputations in diabetic patients on peritoneal dialysis (PD)	Canada	Dialysis unit	Care from one or more health professionals	In 1998 a chiropodist was present on site weekly during the clinic day, offering assessment and education about foot care to patients with diabetes, after patient's regular clinic visit. If foot care was required, patients were referred to another chiropody clinic. In 1999, the chiropodist provided on-site foot care as well as assessment and teaching. In addition, some patients were seen by a chi…	2 years to less than 5 years	No	Prevention and management	Before and after study or interrupted time series	Observational	1997	1999	Equal to or greater than 75%	132	52	63	Peritoneal dialysis	Yes	All had diabetes	Serious foot problems (ulcer, necrotic or gangrenous tissue, osteomyelitis, wounds, pus, open blisters or scabs requiring dressings) were experienced by 20 patients (18%) during 1997 (prior to intervention), 21 patients (25%) during 1998 and 21 patients (31%) during 1999.	Factors that were predictive of shorter time to death or amputation were older age, peripheral vascular disease, and cerebrovascular dis-ease. Being seen by a chiropodist was protective. , Of patients with serious foot problems (ulcer, necrotic or gangrenous tissue, osteomyelitis, wounds, pus, open blisters or scabs requiring dressings), during 1997 (prior to intervention) 50% required amputation…					1	1	0	0	0	2
Lo ZJ, Lin Z, Pua U, Quek LHH, Tan BP, Punamiya S et al. Diabetic Foot Limb Salvage—A Series of 809 Attempts and Predictors for Endovascular Limb Salvage Failure. Ann Vasc Surg. 2018;49:9-16. doi:10.1016/j.avsg.2018.01.061.	2018	Lo	Diabetic Foot Limb Salvage - A Series of 809 Attempts and Predictors for Endovascular Limb Salvage Failure	Review patient characteristics and outcomes of in-patient diabetic foot limb salvage and identify risk factors predicting for endovascular limb salvage failure	Singapore	Inpatient (hospital) setting (other than dialysis)	Surgery	Diabetic limb salvage within our institution involves a multidisciplinary team, with most patients under the primary care of vascular surgery. Endovascular procedures and open bypass procedures were performed.	1 year to less than 2 years	Yes	Prevention and management	Cohort study	Observational	2013	2015	Less than 75% (but 10 or more participants had ESRD and results for this specific group are available)	186	48	63	Not reported	No	All had diabetes		For patients who underwent endovascular limb salvage, 68 (65%) achieved limb salvage while 36 (35%) experienced limb salvage failure					0	1	0	0	0	1
Lucke C, Beindorff N, Roy T, Hoy L, Lucke C. Rehabilitation of Lower Extremity Amputation Due to Peripheral Arterial Occlusive Disease in Patients with End-Stage Renal Failure. Vasc Endovascular Surg. 1999;33(1):33-40. doi:10.1177/153857449903300107.	1999	Beindorff	Rehabilitation of Lower Extremity Amputation Due to Peripheral Arterial Occlusive Disease in Patients with End-Stage Renal Failure	Present data on rehabilitation outcome of a large group of patients with end-stage renal failure and amputation of the lower limb due to peripheral arterial occlusive disease	Germany	Rehabilitation unit	Rehabilitation	Hospital rehabilitation after lower extremity amputation (77% BKA, 23% AKA)	Not reported	Yes	Management	Case series	Observational	1987	1996	Less than 75% (but 10 or more participants had ESRD and results for this specific group are available)	30	63	65	Not reported	Yes	Combination of participants with and without diabetes		77% of ESRD patients received a prosthesis. 74% of BKA patients were discharged ambulatory. , In nearly all patients, difficulties resulting from bad prosthetic fit occurred immediately before and after dialysis.			Average length of stay for rehabilitation was 74 days. During rehabilitation 13 patients (43%) required transfer to an acute hospital unit.		0	1	0	0	1	2
Lumsden AB, Besman A, Jaffe M, MacDonald MJ, Allen RC. Infrainguinal Revascularization in End-Stage Renal Disease. Ann Vasc Surg. 1994;8(1):107-12. doi:10.1007/BF02133412.	1994	Lumsden	Infrainguinal Revascularization in End- Stage Renal Disease	Review experience with infrainguinal vascular reconstruction for limb salvage in the patient undergoing renal replacement therapy (RRT): (1) What is the life expectancy in this subgroup of patients with chronic renal failure? (2) Is infrainguinal graft patency and limb salvage affected by their renal disease? (3) What is the perioperative morbidity and mortality rate? (4) Does limb salvage improv…	United States of America	Inpatient (hospital) setting (other than dialysis)	Surgery	Infrainguinal revascularization (bypass)	2 years to less than 5 years	No	Prevention and management	Cohort study	Observational	1986	1993	Equal to or greater than 75%	27	63	56	Haemodialysis	Yes	Combination of participants with and without diabetes	During follow up there were three significant wound infections and three episodes of wound necrosis requiring operative debridement.	Limb salvage as determined by life-table analysis was 65% at 12 months and 58% at 48 months. Two thirds of the limb loss (eight extremities) occurred during the 3 months following revascularization. Four of these limbs were amputated in the presence of a patent bypass graft. Two required amputation because of progressive necrosis and infection at a toe amputation site. One was related to progress…		Primary graft patency was 64% at 12 months and 38% at 48 months.			1	1	0	1	0	3
Marn Pernat A, Peršič V, Usvyat L, Saunders L, Rogus J, Maddux FW et al. Implementation of routine foot check in patients with diabetes on hemodialysis: associations with outcomes. BMJ Open Diabetes Res Care. 2016;4(1):e000158-e. doi:10.1136/bmjdrc-2015-000158.	2016	Marn Pernat	Implementation of routine foot check in patients with diabetes on hemodialysis: associations with outcomes	Investigate the association between foot checks in diabetic hemodialysis patients and rate of lower limb amputations	United States of America	Dialysis unit	Screening by a health professional	Monthly intradialytic foot checks by dialysis nurse. Foot checks were conducted according to the following standard operation procedure: First, history from the patient in regard to any foot-related issues was taken and documented on the initial foot check form.The history included any lower limb pain, history of pastor present foot ulcers, amputations, or deformities.Information was comprehensiv…	Not reported	Yes	Prevention and management	Before and after study or interrupted time series	Observational	2004	2011	Equal to or greater than 75%	61292	53.5	63	Haemodialysis	No	All had diabetes		The implementation of the monthly foot check program was associated with reduced major lower limb amputation (1.30 per 100 patient years in preimplementation cohort and 1.07 in the postimplementation cohort). Compared with preimplementation cohort, major lower limb amputation decreased by 17% (Poisson regression; p=0.0034). These findings were corroborated in the multivariate analysis (p=0.0175) …					0	1	0	0	0	1
Mathur K, Ayyappan MK, Hodson J, Hopkins J, Tiwari A, Duddy M et al. Factors Affecting Medium-Term Outcomes After Crural Angioplasty in Critically Ischemic Legs. Vasc Endovascular Surg. 2015;49(3-4):63-8. doi:10.1177/1538574415591001.	2015	Mathur	Factors Affecting Medium-Term Outcomes After Crural Angioplasty in Critically Ischemic Legs	To study factors affecting patency and medium-term outcomes after crural angioplasty.	United Kingdom (England, Scotland, Wales, Northern Ireland)	Inpatient (hospital) setting (other than dialysis)	Surgery	Crural (below the popliteal segment) angioplasty	2 years to less than 5 years	No	Prevention and management	Cohort study	Observational	2003	2010	Less than 75% (but 10 or more participants had ESRD and results for this specific group are available)	38	48	63	Not reported	Yes	Presence or absence of diabetes not specified		Limb salvage was 89% at 3 years. , Amputation-free survival was 55% at 1 year and 34% at 3 years.		Primary patency was 53% at 30 days, 42% at 6 months, 39% at 1 year and 16% at 3 years.			0	1	0	1	0	2
Matsumi J, Takada T, Moriyama N, Ochiai T, Tobita K, Shishido K et al. Long-Term Outcomes of Successful Endovascular Therapy Via the Retrograde Approach for Below-the-Knee Chronic Total Occlusion in Patients With Critical Limb Ischemia After a Failed Antegrade Approach. J Invasive Cardiol. 2017;29(1):2-8.	2017	Matsumi	Long-term outcomes of successful endovascular therapy via the retrograde approach for below-the-knee chronic total occlusion in patients with critical limb ischemia after a failed antegrade approach	Report the long-term results of successful endovascular therapy (EVT) for below-the-knee (BTK) chronic total occlusion (CTO) in patients with critical limb ischemia (CLI) using various strategies of the retrograde approach after a failed antegrade approach	Japan	Inpatient (hospital) setting (other than dialysis)	Surgery	Endovascular therapy retrograde approach after a failed antegrade approach. Subsequent outpatient follow up	2 years to less than 5 years	No	Prevention and management	Case series	Observational	2010	2014	Less than 75% (but 10 or more participants had ESRD and results for this specific group are available)	10	48	63	Haemodialysis	No	Presence or absence of diabetes not specified		Freedom from major amputation was 80% at 12 until 60 months		Clinical success was achieved in 7 patients (70%). No retrograde access-site complications or procedural complications occurred.			0	1	0	1	0	2
Matsuzaki K, Miyamoto A, Hakamata N, Fukuda M, Yamauchi Y, Akita T et al. Diabetic foot wounds in haemodialysis patients: 2-year outcome after percutaneous transluminal angioplasty and minor amputation. Int Wound J. 2012;9(6):693-700. doi:10.1111/j.1742-481X.2012.01104.x.	2012	Matsuzaki	Diabetic foot wounds in haemodialysis patients: 2-year outcome after percutaneous transluminal angioplasty and minor amputation	Examine the outcomes of critical limb ischaemia (CLI) patients whose wounds had healed	Japan	Inpatient (hospital) setting (other than dialysis)	Surgery	Patients had undergone the following treatments for foot wounds: percutaneous transluminal angioplasty (PTA) and minor amputation. Wounds were completely healed and patients received therapeutic footwear.	2 years to less than 5 years	No	Prevention and management	Cohort study	Observational	2007	2010	Equal to or greater than 75%	31	71	67.5	Haemodialysis	No	All had diabetes		Minor amputation was performed in 36 limbs of 31 patients. After 2 years 6 patients (19.4% of original cohort, 41.9% of surviving cohort) underwent re-amputation due to lower limb wounds within2 years after the initial surgery. In the six re-amputation cases, three cases underwent ipsilateral toe amputation. Of the remaining three cases, one case underwent ipsilateral and contralateral toe amputa…					0	1	0	0	0	1
McMurray SD, Johnson G, Davis S, McDougall K. Diabetes education and care management significantly improve patient outcomes in the dialysis unit. Am J Kidney Dis. 2002;40(3):566-75. doi:10.1053/ajkd.2002.34915.	2002	McMurray	Diabetes Education and Care Management Significantly Improve Patient Outcomes in the Dialysis Unit	Determine whether intensive education and care management of diabetes could improve glycemic control, alter patient behavior, and reduce complications in the setting of the dialysis unit	United States of America	Dialysis unit	Care from one or more health professionals	The diabetes care manager performed the following categories of activities with patients in the study group only: self-management education, diabetes care monitoring and management, and motivational coaching. Initial nutritional counseling was performed by the renal dietitian and reinforced by the diabetes care manager., After baseline assessments were completed, the control group had no further …	1 year to less than 2 years	Yes	Prevention	Randomised controlled trial	Experimental	Not reported	Not reported	Equal to or greater than 75%	83	54	62	Haemodialysis and peritoneal dialysis	No	All had diabetes		There were no limb amputations in the study group versus five lower-extremity amputations in the control group (p < 0.05)		The control group experienced a significant progression in diabetic-related peripheral vascular/ neuropathic disease from a baseline score of 2.7 to a 12-month foot risk assessment score of 3.3, whereas the study group did not show this progression (P<0.02).	Ten patients in the control group were hospitalized with diabetes or vascular related admissions versus one patient in the study group (P<0.002).	1	0	1	0	1	1	3
McMurray SD, McDougall K. Improving diabetes foot care in the dialysis facility. Nephrol News Issues. 2003;17(10):57, 60-1, 5-6.	2003	McMurray	Improving diabetes foot care in the dialysis facility	Prevention, early identification, referral of foot problems through diabetes self management education	United States of America	Dialysis unit	Other	Initial foot assessment, risk stratification, routine foot checks (weekly, monthly or quarterly based on risk), patient education, motivational support and a referral system	1 year to less than 2 years	Yes	Prevention and management	Randomised controlled trial	Experimental	Not reported	Not reported	Equal to or greater than 75%	83	48	63	Not reported	No	All had diabetes		No amputations occurred in the study group, while the control group had five lower extremity amputations (and two finger amputations) during the 12-month study period (p < 0.05)			Hospitalizations due to diabetes, peripheral vascular disease, lower extremity infections, and amputations were significantly less in the care-managed study group as compared to the control group (p < 0.002).	1	0	1	0	0	1	2
Meloni M, Giurato L, Izzo V, Stefanini M, Pampana E, Gandini R et al. Long term outcomes of diabetic haemodialysis patients with critical limb ischemia and foot ulcer. Diabetes Res Clin Pract. 2016;116:117-22. doi:10.1016/j.diabres.2016.04.030.	2016	Meloni	Long term outcomes of diabetic haemodialysis patients with critical limb ischemia and foot ulcer	Evaluate the outcomes of diabetic dialysis patients with critical limb ischemia and foot ulcer	Italy	Inpatient (hospital) setting (other than dialysis)	Surgery	All patients included in this analysis were managed according to a defined limb salvage protocol that includes: early and aggressive surgical debridement, revascularization performed by endovascular technique,antibiotic therapy in case of infection (starting with empirical broad-spectrum therapy and after driven by swabs culture results).	1 year to less than 2 years	Yes	Prevention and management	Case control study	Observational	Not reported	Not reported	Less than 75% (but 10 or more participants had ESRD and results for this specific group are available)	99	62.6	66.8	Haemodialysis	No	Combination of participants with and without diabetes	30.3% achieved healing while 34.2% experienced non healing. Healing time was approx. 9.4 months (+/-1.12)	14.4% required major amputation. Major amputation occurred at approx. 2.9 months (+/-0.7)		Transcutaneous oxygen pressure (TcPO2) was approx. 18.05mmHg at baseline and approx. 29.6mmHg after 1 month, with a change of 19.77mmHg (+/- 24.54)			1	1	0	1	0	3
Meloni M, Izzo V, Da Ros V, Morosetti D, Stefanini M, Brocco E et al. Characteristics and Outcome for Persons with Diabetic Foot Ulcer and No-Option Critical Limb Ischemia. J Clin Med. 2020;9(11):3745. doi:10.3390/jcm9113745.	2020	Meloni	Characteristics and Outcome for Persons with Diabetic Foot Ulcer and No-Option Critical Limb Ischemia	Evaluate clinical and vascular characteristics, as well as outcomes, for diabetic persons with foot ulceration and no-option critical limb ischemia (CLI)	Italy	Inpatient (hospital) setting (other than dialysis)	Care from one or more health professionals	Vascular surgery as inpatient, diabetic foot follow up in diabetic foot unit	1 year to less than 2 years	No	Prevention and management	Cohort study	Observational	2016	2018	Less than 75% (but 10 or more participants had ESRD and results for this specific group are available)	82	48	63	Not reported	No	Presence or absence of diabetes not specified				46 patients (56%) were revascularized successfully while 36 (44%) were not.			0	0	0	1	0	1
Meloni M, Izzo V, Giurato L, Cervelli V, Gandini R, Uccioli L. Impact of heart failure and dialysis in the prognosis of diabetic patients with ischemic foot ulcers. J Clin Transl Endocrinol. 2018;11:31-5. doi:10.1016/j.jcte.2018.01.002.	2018	Meloni	Impact of heart failure and dialysis in the prognosis of diabetic patients with ischemic foot ulcers	Evaluate the impact of heart failure and dialysis on the outcomes of patients with diabetes and ischemic foot ulcers treated by a preset limb salvage procedure	Italy	Inpatient (hospital) setting (other than dialysis)	Surgery	All patients were hospitalized and treated by a preset limb salvage protocol: ulcer debridement, antibiotic therapy in case of infection, offloading of affected foot and lower limb revascularization. After dis-charge, they had continuous follow up until ulcer healing or death.	1 year to less than 2 years	Yes	Prevention and management	Cohort study	Observational	Not reported	Not reported	Less than 75% (but 10 or more participants had ESRD and results for this specific group are available)	44	82	68	Not reported	No	Combination of participants with and without diabetes		The rate of survival with limb salvage for: dialysis patients without heart failure was 79.2%; dialysis patients with heart failure was 35.0%. , The rate of survival with major amputation for: dialysis patients without heart failure was 8.3%; dialysis patients with heart failure was 10.0%.					0	1	0	0	0	1
Meloni M, Izzo V, Giurato L, Da Ros V, Morosetti D, Ferrannini M et al. Peripheral arterial disease in patients with renal-diabetic foot ulcers. J Wound Care. 2021;30(8):660-4. doi:10.12968/jowc.2021.30.8.660.	2021	Meloni	Peripheral arterial disease in patients with renal-diabetic foot ulcers	Describe the localisation of PAD in patients with renal-diabetic foot and its relationship with immediate outcomes (technical outcomes defined as absence/presence of arterial blood supply to the foot) after revascularisation through percutaneous transluminal angioplasty	Italy	Outpatient setting (other than dialysis)	Surgery	Patients with diabetic foot ulceration and critical limb ischaemia referred to diabetic foot clinic, managed by a pre-set limb salvage protocol (revascularisation, surgical debride, antibiotic therapy if infected, offloading and revascularisation)	Not reported	No	Management	Cohort study	Observational	2014	2017	Less than 75% (but 10 or more participants had ESRD and results for this specific group are available)	82	82.9	69.4	Not reported	No	Combination of participants with and without diabetes				Opening of all occluded arteries, or if not technically possible, opening of a targeted artery was achieved for 26 patients (31.7%). Revascularisation failure occurred for 36 patients (43.9%). Transcutaneous oxygen pressure mean (SD) was 11.0 (+/-6.0) at baseline and 39.0 (+/-13.0) after 1-month.			0	0	0	1	0	1
Metcalf L, Musgrove A. Impact of a new foot care intervention programme in two haemodialysis units in Nottingham, UK. Diabet foot. 2017;20(4):244.	2017	Metcalf	Impact of a new foot care intervention programme in two haemodialysis units in Nottingham, UK	Review the implementation of a podiatry service on two haemodialysis units based on an acute hospital site, to establish if implementation had any impact on major and minor amputation rates, bed days, access to and frequency of preventative podiatry care, and patient satisfaction. The review also aimed to assess the cost of providing the service and monitor the level of referrals from the dialysi…	United Kingdom (England, Scotland, Wales, Northern Ireland)	Dialysis unit	Care from one or more health professionals	Specialist podiatrists attend dialysis units every 3-4 weeks to provide ongoing podiatry. Additional nurse led foot checks	1 year to less than 2 years	No	Prevention and management	Before and after study or interrupted time series	Observational	2014	2015	Equal to or greater than 75%	100	48	63	Haemodialysis	No	All had diabetes		Prior to implementation (01.04.2012 - 31.03.2013) 2 minor amputations occurred. Following the start of nurse-led foot checks (in Aug 2013, period tracked 01.02.2013 - 31.03.2014) 1 minor amputation occurred. Following the addition of podiatry services (in Nov 2014, period tracked 01.04.2014 - 31.03.2015) 2 major and 3 minor amputations occurred. During ongoing podiatry (01.04.2015 -31.03.2016) no…			Hospital admissions due to diabetic foot disease: Prior to implementation (01.04.2012 - 31.03.2013) 7 patients required 152 bed days. Following the start of nurse-led foot checks (in Aug 2013, period tracked 01.02.2013 - 31.03.2014) 6 patients required 86 bed days. Following the addition of podiatry services (in Nov 2014, period tracked 01.04.2014 - 31.03.2015) 7 patients required 377 bed days. D…		0	1	0	0	1	2
Meyer A, Fiessler C, Stavroulakis K, Torsello G, Bisdas T, Lang W et al. Outcomes of dialysis patients with critical limb ischemia after revascularization compared with patients with normal renal function. J Vasc Surg. 2018;68(3):822-9.e1. doi:10.1016/j.jvs.2017.12.048.	2018	Meyer	Outcomes of dialysis patients with critical limb ischemia after revascularization compared with patients with normal renal function	Evaluate outcomes of dialysis patients against the background of current CLI treatment, a comparison with corresponding CLI patients with normal renal function	Germany	Inpatient (hospital) setting (other than dialysis)	Surgery	First-Line Treatments in Patients with Critical Limb Ischemia (CRITISCH). Four different therapy modalities were analysed: bypass surgery, endovascular therapy (EVT), femoral artery endarterectomy, and no vascular intervention (conservative treatment or primary major amputation).	2 years to less than 5 years	Yes	Prevention and management	Cohort study	Observational	2013	2014	Less than 75% (but 10 or more participants had ESRD and results for this specific group are available)	102	79	73	Not reported	No	Combination of participants with and without diabetes		Amputation free survival after 24 months was 35.4%., Major amputation was experienced by 10 of 65 patients (15%) who underwent endovascular therapy, 2 of 13 patients (15%) who underwent open bypass, 1 of 11 patients (9%) who underwent endarterectomy, and 7 of 13 patients (54%) who underwent conservative care or primary amputation.		Reintervention after 24 months was required by 42.6%. , Reintervention was required by 21 of 65 patients (32%) who underwent endovascular therapy, 2 of 13 patients (15%) who underwent open bypass, 3 of 11 patients (27%) who underwent endarterectomy, and 1 of 13 patients (8%) who underwent conservative care or primary amputation.			0	1	0	1	0	2
Meyer A, Schilling A, Kott M, Rother U, Lang W, Regus S. Open Versus Endovascular Revascularization of Below-Knee Arteries in Patients With End-Stage Renal Disease and Critical Limb Ischemia. Vasc Endovascular Surg. 2018;52(8):613-20. doi:10.1177/1538574418789036.	2018	Meyer	Open Versus Endovascular Revascularization of Below-Knee Arteries in Patients With End-Stage Renal Disease and Critical Limb Ischemia	Evaluate below-the-knee open revascularization (OR) versus endovascular revascularization (EVT) in patients with end-stage renal disease and critical limb ischemia (CLI)	Germany	Inpatient (hospital) setting (other than dialysis)	Surgery	Open revascularisation or endovascular revascularization (infrapopliteal)	2 years to less than 5 years	Yes	Prevention and management	Non-randomised controlled study	Experimental	2007	2017	Equal to or greater than 75%	77	69	72.5	Not reported	No	Combination of participants with and without diabetes	Outcomes regarding wound healing after revascularization were likewise poor in both the groups. Within open revascularization (OR) group, wound healing was observed in 29% of patients, compared to 31% in endovascular therapy (EVT) patients (P=0.532) during follow-up. Time to wound healing was neither different between both patient sub-groups (P=0.328).	Major amputation during follow-up was performed in 9 patients (26%) in the open revascularization (OR) group and 4 patients (10%) in endovascular revasculization (EVT) group, resulting in a major amputation rate of 17% during follow-up for all included patients. Median time to major amputation was 11months in OR patients (range: 2-26 months). Early amputation due to uncontrolled infection was nec…		Reintervention during follow-up was necessary in 17% of bypass patients caused by hemodynamic failure (graft occlusion or stenosis) in 5 patients and infection in 1 patient. In comparison, clinically driven redo angioplasty for restenosis during follow-up was performed in 31%of patients in endovascular therapy (EVT) group.			1	1	0	1	0	3
Meyer A, Schinz K, Lang W, Schmid A, Regus S, Rother U. Outcomes and influence of the pedal arch in below-the-knee angioplasty in patients with end-stage renal disease and critical limb ischemia. Ann Vasc Surg. 2016;35:121-9. doi:10.1016/j.avsg.2016.01.039.	2016	Meyer	Outcomes and Influence of the Pedal Arch in Below-the-Knee Angioplasty in Patients with End-Stage Renal Disease and Critical Limb Ischemia	Analyze the outcomes of infrapopliteal angioplasty in the setting of chronic renal failure (end-stage renal disease) and evaluate the influence of the pedal arch involvement on clinical success	Germany	Inpatient (hospital) setting (other than dialysis)	Surgery	Infrapopliteal angioplasty. Minor amputation or conservative local wound therapy.	6 months to less than 1 year	No	Prevention and management	Cohort study	Observational	2010	2014	Equal to or greater than 75%	32	78	73	Haemodialysis	No	Combination of participants with and without diabetes	Assessment revealed a wound-healing rate of 22% after 6 months (6 of 25 remaining patients). At 12-month follow-up, 11 of the remaining 20 patients (53%) showed a complete ulcer healing after endovascular therapy (EVT), whereas at the end of the follow-up, all 8 surviving patients presented with healed wounds. Median time to wound healing was 6 months. , The wound-healing rate was not found to ha…	Simultaneously to the below-knee angioplasty, a minor amputation for infection control was done in 14 of 32 limbs (44%)., At 12-month postintervention, 56% of patients reached the end point and were either dead or amputated. Two-year amputation-free survival rate was limited to less than 40% of patients. However, only 2 major amputations (6%) for progressive tissue necrosis and uncontrolled infec…		No major procedure-related complications were observed., Analysis of post-EVT completion angiography of the foot as proposed by Kawarada revealed after distribution of pedal arch quality: only one patient (3%)showed an entirely complete pedal arch after infrapopliteal angioplasty (category 1). Category IIa was found in 12 patients (38%) and category IIb in 3 patients (9%), postinterventionally. H…			1	1	0	1	0	3
Meyerson SL, Skelly CL, Curi MA, Desai TR, Katz D, Bassiouny HS et al. Long-term results justify autogenous infrainguinal bypass grafting in patients with end-stage renal failure. J Vasc Surg. 2001;34(1):27-33. doi:10.1067/mva.2001.116350.	2001	Meyerson	Long-term results justify autogenous infrainguinal bypass grafting in patients with end-stage renal failure	Examine the modern-era, long-term results of infrainguinal bypass grafting in dialysis-dependent patients	United States of America	Inpatient (hospital) setting (other than dialysis)	Surgery	Autogenous infrainguinal bypass grafting	5 years or more	Yes	Prevention and management	Cohort study	Observational	1994	1999	Less than 75% (but 10 or more participants had ESRD and results for this specific group are available)	64	48	63	Not reported	No	Combination of participants with and without diabetes		Amputation within the first 30 postoperative days was per-formed in 6 (7.3%) of 82 limbs. , Limb loss despite a patent bypass graft occurred infrequently in this study (3 of 82 limbs). Limb salvage at 3 years was 59% ± 8%. Patients with ESRD initially presenting with rest pain had a lower rate of limb loss than patients initially presenting with tissue loss (1 of 15 vs 22 of 67 patients; P < .01)…		Perioperative complications included wound infection 8 (10%) and graft infection 4 (5%)., For autogenous conduits 3-year secondary graft patency was 67% ± 9%. , For non autogenous conduits 2-year patency was 27% ± 12%.			0	1	0	1	0	2
Mistrík EMD, Dusilová-Sulková SMDDS, Bláha VMDPD, Sobotka LMDPD. Plasma albumin levels correlate with decreased microcirculation and the development of skin defects in hemodialyzed patients. Nutrition. 2010;26(9):880-5. doi:10.1016/j.nut.2010.05.007.	2010	Mistrík	Plasma albumin levels correlate with decreased microcirculation and the development of skin defects in hemodialyzed patients	Estimate the influence of peripheral blood flow changes during hemodialysis (HD) on the development of foot defects and its relationship to plasma albumin levels	Czech Republic	Dialysis unit	Screening by a health professional	Peripheral skin blood flow was measured using a laser Doppler line scanner in 10 different areas of the dorsal part of the instep and the toes of each foot before and during HD with ultrafiltration (897 +/- 465 mL/procedure)	1 year to less than 2 years	No	Prevention	Non-randomised controlled study	Experimental	Not reported	Not reported	Equal to or greater than 75%	31	68	59	Haemodialysis	No	Combination of participants with and without diabetes	A significantly larger portion of patients with normal perfusion remained defect-free in comparison to patients with critical perfusion (93% versus 38%,P=0.002, Kaplan-Meier analysis)., Skin defects developed in 11 patients during the 18-month follow-up period. Skin blood flow was significantly lower in these subjects compared to patients with no defects. Skin blood flow before and during hemodia…						1	0	0	0	0	1
Miyake K, Kikuchi S, Okuda H, Koya A, Sawa Y, Azuma N. Graft flow predictive equation in distal bypass grafting for critical limb ischemia. J Vasc Surg. 2019;70(4):1192-203.e2. doi:10.1016/j.jvs.2018.12.057.	2019	Miyake	Graft flow predictive equation in distal bypass grafting for critical limb ischemia	To develop a graft flow (GF) predictive equation by assessing GF determinants and to validate the equation against a clinical dataset	Japan	Inpatient (hospital) setting (other than dialysis)	Surgery	Crural or pedal bypass	2 years to less than 5 years	No	Management	Cohort study	Observational	2011	2016	Less than 75% (but 10 or more participants had ESRD and results for this specific group are available)	83	48	63	Haemodialysis	No	Presence or absence of diabetes not specified				Of 110 grafts, 83 (75%) were normal on postoperative duplex evaluation while 27 (25%) were abnormal. Intraoperative graft flow evaluation showed that 82 (75%) were optimal flow grafts (OFG) while 28 (25%) were suboptimal flow grafts (SFG). Regarding grafts with both HD and poor runoff, 40 grafts were classified in OFGs and 6 were SFGs. Among them, only two grafts in OFGs were abnormal and one suf…			0	0	0	1	0	1
Miyake K, Kikuchi S, Tatsukawa T, Uchida D, Koya A, Sawa Y et al. Predictive Model for Postoperative Ambulatory Function after Lower Extremity Bypass in Chronic Limb-Threatening Ischemia. Ann Vasc Surg. 2021;71:321-30. doi:10.1016/j.avsg.2020.07.033.	2021	Miyake	Predictive Model for Postoperative Ambulatory Function after Lower Extremity Bypass in Chronic Limb-Threatening Ischemia	To develop a predictive model for ambulatory ability 1 year after bypass based on preoperative risk factors, including the Wound, Ischemia, and foot Infection (WIfI) classification	Japan	Inpatient (hospital) setting (other than dialysis)	Surgery	Below the knee artery by-pass	2 years to less than 5 years	No	Prevention and management	Cohort study	Observational	2013	2017	Less than 75% (but 10 or more participants had ESRD and results for this specific group are available)	146	48	63	Haemodialysis	No	Presence or absence of diabetes not specified				60% (39 of 65) hemodialysis patients were ambulant 1 year postoperatively			0	0	0	1	0	1
Miyata T, Mii S, Kumamaru H, Takahashi A, Miyata H. Risk prediction model for early outcomes of revascularization for chronic limb-threatening ischaemia. Br J Surg. 2021;108(8):941-50. doi:10.1093/bjs/znab036.	2021	Miyata	Risk prediction model for early outcomes of revascularization for chronic limb-threatening ischaemia	Create a risk prediction model for treatment outcomes 30 days after revascularization in patients with chronic , limb-threatening ischaemia (CLTI).	Japan	Inpatient (hospital) setting (other than dialysis)	Surgery	Revascularization	Less than 6 months	No	Prevention and management	Cohort study	Observational	2013	2016	Less than 75% (but 10 or more participants had ESRD and results for this specific group are available)	1164	48	63	Haemodialysis	No	Presence or absence of diabetes not specified		43 (3.7%) patients on haemodialysis had major amputation.		39 (3.4%) patients on haemodialysis had major reintervention.			0	1	0	1	0	2
Morimoto S, Yano Y, Maki K, Sawada K, Iwasaka T. Efficacy of Low-Density Lipoprotein Apheresis in Patients with Peripheral Arterial Occlusive Disease Undergoing Hemodialysis Treatment. Am J Nephrol. 2007;27(6):643-8. doi:10.1159/000108634.	2007	Morimoto	Efficacy of Low-Density Lipoprotein Apheresis in Patients with Peripheral Arterial Occlusive Disease Undergoing Hemodialysis Treatment	Determine whether low-density lipoprotein (LDL) apheresis is effective even for peripheral arterial occlusive disease (PAOD) patients undergoing hemodialysis, who tend to be refractory to any treatment, and if so, to determine the mechanism of its efficacy	Japan	Outpatient setting (other than dialysis)	Other	Low-density lipoprotein (LDL) apheresis	Less than 6 months	No	Prevention and management	Case series	Observational	Not reported	Not reported	Equal to or greater than 75%	11	73	69.9	Haemodialysis	No	Presence or absence of diabetes not specified	Patient No. 1 (female, 75 years old) exhibited prominent improvement of toe ulcer. This patient had an ulcer on her little toe, which, though resistant to all medications before low-density lipoprotein (LDL) apheresis, had completely healed by 6 months after the start of LDL apheresis.			Among 6 patients with Fontaine stages III and IV, resting leg pain was reduced in 5 patients and Fontaine stage was improved in 3 patients while both factors were worsened in 1 patient. In the remaining 5 cases (Fontaine stage II), there was no resting pain before initiation and the fair condition was maintained throughout the study. , Our findings suggest that low-density lipoprotein (LDL) apher…			1	0	0	1	0	2
Naazie IN, Mwinyogle A, Nejim B, Al-Nouri O, Cajas-Monson L, Malas MB. The association of estimated glomerular filtration rate with outcomes following infrainguinal bypass for peripheral arterial disease. J Vasc Surg. 2021;74(3):788-97.e1. doi:10.1016/j.jvs.2021.01.068.	2021	Naazie	The association of estimated glomerular filtration rate with outcomes following infrainguinal bypass for peripheral arterial disease	To determine the graded impact of chronic kidney disease (CKD), defined by (estimated glomerular filtration rate) eGFR, on infrainguinal lower extremity bypass (LEB) outcomes	United States of America	Inpatient (hospital) setting (other than dialysis)	Surgery	Infrainguinal lower extremity bypass	5 years or more	No	Prevention and management	Cohort study	Observational	2003	2019	Less than 75% (but 10 or more participants had ESRD and results for this specific group are available)	2882	66.3	66.6	Haemodialysis	No	Combination of participants with and without diabetes		The 1-year major amputation rate was 21.8%		Return to operation room (RTOR) occurred in 20.6% patients			0	1	0	1	0	2
Nakama T, Ichihashi S, Ogata K, Kojima S, Muraishi M, Obunai K et al. Twelve-Month Clinical Outcomes of Percutaneous Deep Venous Arterialization with Alternative Techniques and Ordinary Endovascular Therapy Devices for Patients with Chronic Limb-Threatening Ischemia: Results of the DEPARTURE Japan Study. Cardiovasc Intervent Radiol. 2022;45(5):622-32. doi:10.1007/s00270-022-03095-1.	2022	Nakama	Twelve-Month Clinical Outcomes of Percutaneous Deep VenousArterialization with Alternative Techniques and OrdinaryEndovascular Therapy Devices for Patients with Chronic Limb-Threatening Ischemia: Results of the DEPARTURE Japan Study	To evaluate the clinical outcomes of percutaneous deep venous arterialization in Japanese patients with no-option chronic limb-threatening ischemia and tissue loss	Japan	Inpatient (hospital) setting (other than dialysis)	Surgery	Percutaneous deep venous arterialization (pDVA)	1 year to less than 2 years	No	Prevention and management	Cohort study	Observational	2016	2020	Equal to or greater than 75%	16	48	63	Haemodialysis	No	Presence or absence of diabetes not specified	At 6 and 12 months, complete wound healing rates were 23.0% and 53.2%., The median time to complete wound healing was 234 days (interquartile range 127 €“306) .	The 30-day major amputation ate was 22%. At 6 and 12 months, the limb salvage rates were 72% and 72%.		The technical success rate was 88.9%.			1	1	0	1	0	3
Nakamura T, Matsuda T, Suzuki Y, Ueda Y, Koide H. Effects of Low-Density Lipoprotein Apheresis on Plasma Matrix Metalloproteinase-9 and Serum Tissue Inhibitor of Metalloproteinase-1 Levels in Diabetic Hemodialysis Patients with Arteriosclerosis Obliterans. ASAIO journal (1992). 2003;49(4):430-4. doi:10.1097/01.MAT.0000073968.56433.87.	2003	Nakamura	Effects of Low-Density Lipoprotein Apheresis on Plasma Matrix Metalloproteinase-9 and Serum Tissue Inhibitor of Metalloproteinase-1 Levels in Diabetic Hemodialysis Patients with Arteriosclerosis Obliterans	Determine whether low density lipoprotein (LDL) apheresis alters levels of plasma matrix metalloproteinase-9 (MMP-9) and serum tissue inhibitor of matrix metalloproteinase-1 (TIMP-1)	Japan	Outpatient setting (other than dialysis)	Other	Plasma (4,000 ml) was processed for 3 hours during each low-density lipoprotein (LDL) apheresis session. Apheresis was carried out once weekly for 10 consecutive weeks	Not reported	Yes	Management	Non-randomised controlled study	Experimental	Not reported	Not reported	Less than 75% (but 10 or more participants had ESRD and results for this specific group are available)	40	70	56	Haemodialysis	No	All had diabetes	LDL apheresis diminished the size of ulcer/necrosis in all patients			The treadmill walking distance of all patients increased significantly. Ischemic symptoms, including leg pain at rest and leg coldness and numbness, improved after low density lipoprotein (LDL) apheresis. Ankle pressure index increased significantly from 0.35+/-0.12 to 0.45+/-0.16 (p<0.05)., Plasma metalloproteinase-9 (MMP-9) and serum tissue in-hibitor of matrix metalloproteinase-1 (TIMP-1) leve…			1	0	0	1	0	2
Nakano M, Hirano K, Iida O, Soga Y, Kawasaki D, Suzuki K et al. Prognosis of Critical Limb Ischemia in Hemodialysis Patients After Isolated Infrapopliteal Balloon Angioplasty: Results From the Japan Below-the-Knee Artery Treatment (J-BEAT) Registry. J Endovasc Ther. 2013;20(1):113-24. doi:10.1583/11-3782.1.	2013	Nakano	Prognosis of Critical Limb Ischemia in Hemodialysis Patients After Isolated Infrapopliteal Balloon Angioplasty: Results From the Japan Below-the-Knee Artery Treatment (J-BEAT) Registry	Evaluate the long-term clinical results after isolated infrapopliteal balloon angioplasty for critical limb ischemia (CLI) in end-stage renal disease patients on hemodialysis	Japan	Inpatient (hospital) setting (other than dialysis)	Surgery	Balloon angioplasty for primary treatment of isolated infrapopliteal artery lesions	5 years or more	Yes	Prevention and management	Cohort study	Observational	2004	2010	Less than 75% (but 10 or more participants had ESRD and results for this specific group are available)	242	77.7	67.8	Haemodialysis	No	Combination of participants with and without diabetes		Freedom from major amputation was 80.9%, 77.1%, and 77.1% at 1, 3, and 5 years, respectively., From univariate and multivariate analyses, predictors of major amputation were younger age (HR 0.94, 95%CI 0.91 to 0.98; p=0.002), current smoking (HR 2.59, 95%CI 1.25 to 5.36; p=0.01), non-ambulatory status (HR 2.18, 95%CI 1.07 to 4.53; p=0.031), the presence of gangrene prior to endovascular therapy (…		Technical success rate was ~85% and direct flow to the site of tissue loss based on the angiosome concept was ~50%. , During the observation period, 9.9%(28/283 limbs) underwent bypass surgery. , Freedom from target extremity revascularisation was 63.0%, 52.6%, and 48.3% at 1, 3, and 5 years, respectively			0	1	0	1	0	2
Nakano M, Hirano K, Iida O, Yamauchi Y, Soga Y, Kawasaki D et al. Clinical Efficacy of Infrapopliteal Endovascular Procedures for Hemodialysis Patients with Critical Limb Ischemia. Ann Vasc Surg. 2015;29(6):1225-34. doi:10.1016/j.avsg.2015.03.034.	2015	Nakano	Clinical Efficacy of Infrapopliteal Endovascular Procedures for Hemodialysis Patients with Critical Limb Ischemia	Investigate 5-year clinical outcomes after infrapopliteal endovascular therapy(EVT) for critical limb ischemia (CLI) patients on or not on hemodialysis (HD), and compare the clinical efficacy of EVT between the 2 groups	Japan	Inpatient (hospital) setting (other than dialysis)	Surgery	Infrapopliteal endovascular therapy	5 years or more	No	Prevention and management	Cohort study	Observational	2004	2012	Less than 75% (but 10 or more participants had ESRD and results for this specific group are available)	670	77	69.1	Haemodialysis	No	Combination of participants with and without diabetes		Major amputation rate was 13.0%. , Amputation free survival at 1 and 5 years was 65.7 ± 2.0% and 34.4 ± 3.1%, respectively.		Postoperative angiographic results revealed that the achievement of direct flow to the site of tissue loss based on the angiosome concept was 59.8%. In the follow-up period, the incidence of any reintervention was 44.8%. Open bypass surgery was performed on 5.8%. , Any reintervention or above-ankle amputation of the index limb was required by 49.0 ±1.9%, 30.4 ± 2.3%, and 26.9 ± 2.7% patients at 1…			0	1	0	1	0	2
Nakano M, Muramatsu T, Hirano K, Tsukahara R, Itou Y, Ishimori H. Six-month clinical outcomes after below-the-knee angioplasty for critical limb ischemia in patients on hemodialysis. Cardiovasc Interv and Ther. 2010;25(2):91-7. doi:10.1007/s12928-010-0018-z.	2010	Nakano	Six-month clinical outcomes after below-the-knee angioplasty for critical limb ischemia in patients on hemodialysis	Evaluate 6-month clinical outcomes after below-the-knee (BTK) angioplasty for critical limb ischemia (CLI) in patients on hemodialysis (HD)	Japan	Inpatient (hospital) setting (other than dialysis)	Surgery	Percutaneous transluminal angioplasty (PTA)	6 months to less than 1 year	Yes	Prevention and management	Cohort study	Observational	2004	2008	Less than 75% (but 10 or more participants had ESRD and results for this specific group are available)	35	77.1	65.5	Haemodialysis	No	Combination of participants with and without diabetes		11.1% required major amputation		Technical success was achieved in 62.0% of procedures and good flow in the pedal arch was achieved in 37.8%. , During 6-month follow up, 28.9% required repeat percutaneous transluminal angioplasty (PTA). The percentage of repeat PTA performed twice or more times within 6- months was 13.3%.			0	1	0	1	0	2
Nakayama M, Itami N, Suzuki H, Hamada H, Yamamoto R, Tsunoda K et al. Novel haemodialysis (HD) treatment employing molecular hydrogen (H2)-enriched dialysis solution improves prognosis of chronic dialysis patients: A prospective observational study. Sci Rep. 2018;8(1):254-. doi:10.1038/s41598-017-18537-x.	2018	Nakayama	Novel haemodialysis (HD) treatment employing molecular hydrogen (H2)-enriched dialysis solution improves prognosis of chronic dialysis patients: A prospective observational study	Explore clinical impact of a novel haemodialysis (E-HD) system delivering an H2 (30 €“80 ppb)-enriched dialysis solution by water electrolysis	Japan	Dialysis unit	Other	Haemodialysis (E-HD) system delivering an H2 (30 €“80 ppb)-enriched dialysis solution by water electrolysis versus conventional haemodialysis	2 years to less than 5 years	Yes	Prevention	Non-randomised controlled study	Experimental	2011	Not reported	Equal to or greater than 75%	309	58	65	Haemodialysis	No	Combination of participants with and without diabetes				Peripheral artery disease with surgical procedure (including death) was experienced by 8 patients In the conventional haemodialysis group and 2 patients in the electrolyzed water haemodialysis.			0	0	0	1	0	1
Nakazawa KR, Cornwall JW, Rao A, Han DK, Ting W, Tadros RO et al. Trends, factors, and disparities associated with length of stay after lower extremity bypass for tissue loss. J Vasc Surg. 2021;73(1):190-9. doi:10.1016/j.jvs.2020.04.511.	2021	Nakazawa	Trends, factors, and disparities associated with length of stay afterlower extremity bypass for tissue loss	To determine predictors of increased length of stay (LOS) in patients who underwent lower extremity bypass for tissue loss	United States of America	Inpatient (hospital) setting (other than dialysis)	Surgery	Lower extremity bypass (LEB)	Less than 6 months	No	Management	Cohort study	Observational	2011	2016	Less than 75% (but 10 or more participants had ESRD and results for this specific group are available)	534	48	63	Not reported	No	Presence or absence of diabetes not specified					35% of dialysis patients had an extended LOS (>75th percentile, 9 days).		0	0	0	0	1	1
Neil JA, Knuckey CJ, Tanenberg RJ. Prevention of foot ulcers in patients with diabetes and end stage renal disease. Nephrol Nurse J. 2003;30(1):39-43.	2003	Neil	Prevention of Foot Ulcers in Patients with Diabetes and End Stage Renal Disease	To (a) describe the self-care practices of persons with diabetes and ESRD on selected aspects of foot care, footwear, and attitudes about diabetes; (b) determine whether a significant decrease in foot ulcers and lower extremity amputations could be achieved in renal dialysis patients by patient education about foot care, foot exams, and proper footwear; and (c) determine if the cost savings of ul…	United States of America	Dialysis unit	Care from one or more health professionals	For the experimental group: foot assessments, individual foot care education, group foot care education and special shoes or insets for each person.	Not reported	Yes	Prevention	Non-randomised controlled study	Experimental	Not reported	Not reported	Equal to or greater than 75%	21	29	60.5	Haemodialysis	No	All had diabetes							0	0	0	0	0	0
Nejim B, Hicks CW, Arhuidese I, Locham S, Dakour-Aridi H, Malas M. Outcomes of Infrainguinal Lower Extremity Bypass Are Superior in Kidney Transplant Recipients Than Patients with Dialysis. Ann Vasc Surg. 2020;63:209-17. doi:10.1016/j.avsg.2019.04.026.	2020	Nejim	Outcomes of Infrainguinal Lower Extremity Bypass Are Superior in Kidney Transplant Recipients Than Patients with Dialysis	Compare the efficacy and durability of Lower extremity bypass (LEB) in patients with kidney transplants compared with dialysis patients	United States of America	Inpatient (hospital) setting (other than dialysis)	Surgery	Infrainguinal bypass	2 years to less than 5 years	No	Prevention and management	Cohort study	Observational	2003	2016	Equal to or greater than 75%	1714	68	65	Haemodialysis and peritoneal dialysis	Yes	Combination of participants with and without diabetes		Amputation free survival, (AFS) rates for dialysis patients were 59.6% (57.1% - 59.2%) at 1 year and 48.0% (45.4% - 50.6%) at 2 years.		Primary patency rates were 82.8% (80.4%-85.0%) at 1 year and 80.5% (77.8%-82.9%) at 2 years in dialysis patients. Prosthetic conduit was associated with 53% higherodds to lose its patency than great saphenous , vein (GSV) graft (aHR: 1.53, 95% CI: 1.02-2.30;P=0.041). Compared with femoral-popliteal bypasses, distal bypasses were associated with worse primary patency (femoral-tibial: 1.68 [1.23-2.…			0	1	0	1	0	2
Neville RFMD, Capone ABS, Amdur RP, Lidsky MMD, Babrowicz JMD, Sidawy ANMDMPH. A comparison of tibial artery bypass performed with heparin-bonded expanded polytetrafluoroethylene and great saphenous vein to treat critical limb ischemia. J Vasc Surg. 2012;56(4):1008-14. doi:10.1016/j.jvs.2012.03.020.	2012	Neville	A comparison of tibial artery bypass performed with heparin-bonded expanded polytetrafluoroethylene and great saphenous vein to treat critical limb ischemia	Examine outcomes for tibial artery bypass using expanded polytetrafluoroethylene (ePTFE) bonded with heparin (HePTFE) and aphenous vein graft (SVG) for below-knee bypass over a contemporaneous time period	United States of America	Inpatient (hospital) setting (other than dialysis)	Surgery	Expanded polytetrafluoroethylene (ePTFE) bonded with heparin (HePTFE) or saphenous vein graft (SVG) for below-knee bypass	1 year to less than 2 years	Yes	Management	Cohort study	Observational	2006	2009	Less than 75% (but 10 or more participants had ESRD and results for this specific group are available)	17	48	63	Haemodialysis	No	Presence or absence of diabetes not specified				Primary patency at 1 year was 57%			0	0	0	1	0	1
Nicholas GG, Bozorgnia M, Nastasee SA, Reed JF. Infrainguinal Bypass in Patients with End-stage Renal Disease: Survival and Ambulation. Vasc Endovascular Surg. 2000;34(2):147-56. doi:10.1177/153857440003400206.	2000	Nicholas	Infrainguinal bypass in patients with end-stage renal disease: survival and ambulation	Evaluate the outcomes of infrainguinal bypass surgery and ambulatory status in patients with end-stage renal disease (ESRD)	United States of America	Inpatient (hospital) setting (other than dialysis)	Surgery	Infrainguinal bypass surgery	2 years to less than 5 years	No	Prevention and management	Cohort study	Observational	1985	1995	Less than 75% (but 10 or more participants had ESRD and results for this specific group are available)	57	60	65.8	Haemodialysis and peritoneal dialysis	No	Combination of participants with and without diabetes		The cumulative limb loss was 29.7% +/- 1.1% at 1 year and 36.7% +/- 2.6% at 2 years., The presence of cellulitis extending to the ankle or leg was associated with limb loss in 5 of 14 limbs (35.7%) at one year; and, in the absence of this extent of cellulitis, 7 of 52 limbs (13.5%) were lost (p = 0.069)., Limb amputation was experienced by 24.2%		At one year 21% of patients were ambulatory and 10% could ambulate independently (without cane, crutches or walker).			0	1	0	1	0	2
Nishibe T, Kondo Y, Dardik A, Muto A, Koizumi J, Nishibe M. Stent placement in the superficial femoral artery for patients on chronic hemodialysis with peripheral artery disease. Int Angiol. 2009;28(6):484-9.	2009	Nishibe	Stent placement in the superficial femoral artery for patients on chronic hemodialysis with peripheral artery disease	Assess the hemodynamic and clinical outcomes of stent placement in the superficial femoral artery (SFA) for patients on chronic hemodialysis	Japan	Inpatient (hospital) setting (other than dialysis)	Surgery	Primary stent placement in the superficial femoral artery	2 years to less than 5 years	No	Prevention and management	Cohort study	Observational	2005	2008	Less than 75% (but 10 or more participants had ESRD and results for this specific group are available)		81	64.7	Haemodialysis	No	Combination of participants with and without diabetes		Limb salvage was 94% at 6, 12 and 24 months, respectively.		There were no complications due to local access., The ankle brachial index (ABI) before and after stent placement significantly increased from 0.39+/-0.34 to 0.80+/-0.15 (P<0.001). , Primary patency was 87%, 77% and 77% at 6, 12 and 24 months, respectively. Assisted primary patency was 94% at 6, 12 and 24 months, respectively.			0	1	0	1	0	2
O'Brien-Irr MSMSRN, Dosluoglu HHMD, Harris LMMD, Dryjski MLMDP. Outcomes after endovascular intervention for chronic critical limb ischemia. J Vasc Surg. 2011;53(6):1575-81. doi:10.1016/j.jvs.2011.01.068.	2011	O'Brien-Irr	Outcomes after endovascular intervention for chronic critical limb ischemia	Evaluate outcomes after endovascular intervention (EVI) for chronic critical limb ischemia (CLI) by Rutherford category (RC) 4, rest pain; and 5, tissue loss	United States of America	Inpatient (hospital) setting (other than dialysis)	Surgery	Endovascular intervention (EVI)	1 year to less than 2 years	No	Management	Cohort study	Observational	2005	2008	Less than 75% (but 10 or more participants had ESRD and results for this specific group are available)	11	48	63	Not reported	No	Presence or absence of diabetes not specified				Sustained clinical success (Rutherford improvement score of> or = 2+: still symptomatic but with improvement in lesion category (may have claudication but not CLI); ABI increased by at least 0.10, but not normalized, without target extremity revascularization (TER), recurrent or new ulceration) was achieved by 0% of patients. , Secondary sustained clinical success (Rutherford improvement score of…			0	0	0	1	0	1
O'Hare AM, Bertenthal D, Sidawy AN, Shlipak MG, Sen S, Chren M-M. Renal Insufficiency and Use of Revascularization among a National Cohort of Men with Advanced Lower Extremity Peripheral Arterial Disease. Clin J Am Soc Nephrol. 2006;1(2):297-304. doi:10.2215/CJN.01070905.	2006	O'Hare	Renal Insufficiency and Use of Revascularization among a National Cohort of Men with Advanced Lower Extremity Peripheral Arterial Disease	To investigate whether the presence of renal insufficiency affects the clinical management of PAD	United States of America	Multiple settings	Care from one or more health professionals	Various managements of critical limb ischemia: revascularization, amputation or no intervention	1 year to less than 2 years	Yes	Prevention and management	Cohort study	Observational	2000	2002	Less than 75% (but 10 or more participants had ESRD and results for this specific group are available)	371	48	63	Not reported	No	Presence or absence of diabetes not specified		One-year amputation rates among patients who underwent revascularization were 44% among those who were on dialysis					0	1	0	0	0	1
O'Hare AM, Feinglass J, Reiber GE, Rodriguez RA, Daley J, Khuri S et al. Postoperative Mortality after Nontraumatic Lower Extremity Amputation in Patients with Renal Insufficiency. J Am Soc Nephrol. 2004;15(2):427-34. doi:10.1097/01.ASN.0000105992.18297.63.	2004	O'Hare	Postoperative Mortality after Nontraumatic Lower Extremity Amputation in Patients with Renal Insufficiency	Measure the association between renal dysfunction and 30 day mortality after nontraumatic amputation adjusted for confounders	United States of America	Inpatient (hospital) setting (other than dialysis)	Surgery	Minor or major amputation	Less than 6 months	No	Management	Cohort study	Observational	1994	2001	Less than 75% (but 10 or more participants had ESRD and results for this specific group are available)	1110	99	63	Not reported	No	Combination of participants with and without diabetes		Within 30 days, 15% required repeat amputation at the same or a more proximal anatomical level.					0	1	0	0	0	1
O'Hare AM, Feinglass J, Sidawy AN, Bacchetti P, Rodriguez RA, Daley J et al. Impact of renal insufficiency on short-term morbidity and mortality after lower extremity revascularization: Data from the Department of Veterans Affairs' National Surgical Quality Improvement Program. J Am Soc Nephrol. 2003;14(5):1287-95. doi:10.1097/01.ASN.0000061776.60146.02.	2003	O'Hare	Impact of Renal Insufficiency on Short-Term Morbidity and Mortality after Lower Extremity Revascularization: Data from the Department of Veterans Affairs €™ National Surgical Quality Improvement Program	To explore differences in a range of short-term (within 30 d post-operatively) surgical outcomes after lower extremity revascularization among patients with different levels of renal function.	United States of America	Inpatient (hospital) setting (other than dialysis)	Surgery	Lower-extremity surgical revascularization	Less than 6 months	No	Management	Cohort study	Observational	1994	2001	Less than 75% (but 10 or more participants had ESRD and results for this specific group are available)	383	99	63	Not reported	No	Combination of participants with and without diabetes				Operative site complications within 30 days included superficial wound infection (4%), deep wound infection (5%), wound dehiscence (2%) and graft failure requiring return to the operating room (5%)			0	0	0	1	0	1
O'Hare AM, Sidawy AN, Feinglass J, Magee Merine K, Daley J, Khuri S et al. Influence of renal insufficiency on limb loss and mortality after initial lower extremity surgical revascularization. J Vasc Surg. 2004;39(4):709-16. doi:10.1016/j.jvs.2003.11.038.	2004	O'Hare	Influence of renal insufficiency on limb loss and mortality after initial lower extremity surgical revascularization	As limb loss after lower extremity surgical revascularization occurs relatively frequently in patients receiving dialysis, determine whether patients with milder degrees of renal insufficiency are also at risk for this complication	United States of America	Inpatient (hospital) setting (other than dialysis)	Surgery	Initial surgical revascularization	1 year to less than 2 years	No	Prevention	Cohort study	Observational	1995	2000	Less than 75% (but 10 or more participants had ESRD and results for this specific group are available)	182	98	63	Not reported	No	Combination of participants with and without diabetes		29% (53 of 182) of patients receiving dialysis had major lower extremity amputation with in 1 year.					0	1	0	0	0	1
Ohtake T, Mochida Y, Matsumi J, Tobita K, Ishioka K, Oka M et al. Beneficial Effect of Endovascular Therapy and Low-Density Lipoprotein Apheresis Combined Treatment in Hemodialysis Patients With Critical Limb Ischemia due to Below-Knee Arterial Lesions. Ther Apher Dial. 2016;20(6):661-7. doi:10.1111/1744-9987.12450.	2016	Ohtake	Beneficial Effect of Endovascular Therapy and Low-Density Lipoprotein Apheresis Combined Treatment in Hemodialysis Patients With Critical Limb Ischemia due to Below-Knee Arterial Lesions	To assess the clinical benefit of combined treatment of below-knee endovascular therapy (BK-EVT) plus low-density lipoprotein apheresis (LDLA) compared with BK-EVT monotherapy, for hemodialysis (HD) patients with critical limb ischemia (CLI) due to isolated BK arterial lesions	Japan	Inpatient (hospital) setting (other than dialysis)	Surgery	Below-knee endovascular therapy (BK-EVT) plus low-density lipoprotein apheresis (LDLA) compared with BK-EVT monotherapy	2 years to less than 5 years	Yes	Prevention and management	Cohort study	Observational	2011	2014	Equal to or greater than 75%	87	80	71.7	Haemodialysis	No	Combination of participants with and without diabetes		Major adverse limb event (MALE - Combined endpoint of re-EVT and/or major amputation) showed significantly a better result in the hybrid therapy group than in BK-EVT monotherapy group. MALE-free rate at 30 months was 72.0% and 45.1% in hybrid therapy group and BK-EVT monotherapy group, respectively (P=0.04).		Procedural success rate was not different between two groups: 83.5% in below-knee endovascular therapy (BK-EVT) group and 87.0% in BK-EVT plus low-density lipoprotein apheresis (+LDLA) group. Revascularization failure, which means failure of at least one straight line in culprit vessels, was 9.7% (6/62 patients) in BK-EVT group and 4.0% (1/25 patients) in BK-EVT +LDLA group, and was not statistic…			0	1	0	1	0	2
Okazaki J, Guntani A, Homma K, Kyuragi R, Kawakubo E, Matsumoto T et al. Mid-term clinical outcome of critical limb ischemia after infrapopliteal bypass surgery. Fukuoka Igaku Zasshi. 2011;102(2):31-9.	2011	Okazaki	Mid-Term Clinical Outcome of Critical Limb Ischemia after Infrapopliteal Bypass Surgery	Present our 7-year experience and the mid-term clinical outcomes of infrapopliteal bypass surgery for CLI, and review the technical aspects and problems associated with this procedure	Japan	Inpatient (hospital) setting (other than dialysis)	Surgery	Infrainguinal bypass surgery	2 years to less than 5 years	No	Prevention and management	Cohort study	Observational	2003	2010	Less than 75% (but 10 or more participants had ESRD and results for this specific group are available)	16	48	63	Haemodialysis	No	Presence or absence of diabetes not specified		Amputation free survival after 4 years was 49.2%		Secondary patency at 3-years was 82.5%			0	1	0	1	0	2
Okazaki J, Ishida M, Tanaka K. SS17 Analysis of Wound-Healing Time and Wound-Free Period As Outcomes After Surgical and Endovascular Revascularization for Critical Lower-Limb Ischemia. J Vasc Surg. 2017;65(6):130S-1S. doi:10.1016/j.jvs.2017.03.245.	2017	Okazaki	Analysis of wound healing time and wound-free period as outcomes after surgical and endovascular revascularization for critical lower limb ischemia	Elucidate the long-term clinical course of ischemic wounds after revascularization	Japan	Inpatient (hospital) setting (other than dialysis)	Surgery	Surgical or endovascular revascularization of the infrainguinal vessels. Monitoring for subsequent wounds and wound free time	2 years to less than 5 years	No	Prevention and management	Cohort study	Observational	2009	2013	Less than 75% (but 10 or more participants had ESRD and results for this specific group are available)	161	48	63	Not reported	No	Presence or absence of diabetes not specified	Within 3 years from primary revascularization 60.2% of limbs achieved wound healing, with a mean wound health time of 154.5 days. , Mean wound-free period in the subgroup of limbs that achieved healing within 3 years was 612.5 days.						1	0	0	0	0	1
Orimoto YMD, Ohta TMD, Ishibashi HMD, Sugimoto IMD, Iwata HMD, Yamada TMD et al. The prognosis of patients on hemodialysis with foot lesions. J Vasc Surg. 2013;58(5):1291-9. doi:10.1016/j.jvs.2013.05.027.	2013	Orimoto	The prognosis of patients on hemodialysis with foot lesions	Clarify the probability of survival and limb salvage in patients with foot lesions and how to manage these patients	Japan	Inpatient (hospital) setting (other than dialysis)	Care from one or more health professionals	Aggressive risk factor interventions, such as smoking cessation, glycemic control, blood pressure control, and lipid control. Pain control was performed using oral analgesics (non steroidal anti-inflammatory drugs), and a sciatic nerve block above the popliteal space using an ultrasound-guided puncture method from 2006. Bypass surgery (except for several infected limbs). Endovascular arterial tre…	5 years or more	No	Prevention and management	Cohort study	Observational	1980	2011	Equal to or greater than 75%	234	72	65.4	Haemodialysis	No	Combination of participants with and without diabetes		Of 88 limbs (28%) that underwent arterial reconstruction, 20 limbs underwent major amputation. , Of 67 limbs with infrapopliteal arterial reconstruction, 14 underwent major amputation, and three of these limbs were amputated despite patent grafts because of uncontrolled infection. , Major amputation was performed in 99 of 231 nonrevascularized limbs (43%) because of the presence of necrosis or in…		Of 88 limbs (28%) that underwent arterial reconstruction, 67 arterial reconstructions were patent at the end of the follow-up period. , Maintaining patency was most common in limbs with lesions with University of Texas classification D/III (38.8% of patent limbs) followed by C/III (23.9%).			0	1	0	1	0	2
Örneholm H, Apelqvist J, Larsson J, Eneroth M. Heel ulcers do heal in patients with diabetes. Int Wound J. 2017;14(4):629-35. doi:10.1111/iwj.12654.	2017	Orneholm	Heel ulcers do heal in patients with diabetes	Investigate a large cohort of ulcers located in the heel in patients with diabetes	Sweden	Outpatient setting (other than dialysis)	Care from one or more health professionals	Multidisciplinary diabetes foot clinic	2 years to less than 5 years	No	Prevention and management	Cohort study	Observational	1983	2013	Less than 75% (but 10 or more participants had ESRD and results for this specific group are available)	95	48	63	Not reported	Yes	Presence or absence of diabetes not specified	49 achieved primary healing (52%), 5 healed after major debridement but no amputation (5%), 16 healed after amputation (17%) and 25 were unhealed at time of death (26%).						1	0	0	0	0	1
Osteguin V, Cheng TW, Farber A, Eslami MH, Kalish JA, Jones DW et al. Emergency Department Utilization after Lower Extremity Bypass for Critical Limb Ischemia. Ann Vasc Surg. 2019;54:134-43. doi:10.1016/j.avsg.2018.03.028.	2019	Osteguin	Emergency Department Utilization after Lower Extremity Bypass for Critical Limb Ischemia	Assess perioperative emergency department (ED) visits after lower extremity bypass (LEB) for patients with critical limb ischemia (CLI)	United States of America	Inpatient (hospital) setting (other than dialysis)	Surgery	Lower extremity bypass	Less than 6 months	No	Prevention and management	Cohort study	Observational	2008	2017	Less than 75% (but 10 or more participants had ESRD and results for this specific group are available)	45	48	63	Not reported	No	Presence or absence of diabetes not specified					14 patients (31%) presented to emergency department (for any reason) within 30 days, of whom 4 required hospital admission. , 23 patients (51%) presented to emergency department (for any reason) within 90 days, of whom 4 required hospital admission.		0	0	0	0	1	1
Owens CDMD, Ho KJMD, Kim SBS, Schanzer AMD, Lin JMDMPH, Matros EMD et al. Refinement of survival prediction in patients undergoing lower extremity bypass surgery: Stratification by chronic kidney disease classification. J Vasc Surg. 2007;45(5):944-52. doi:10.1016/j.jvs.2007.01.025.	2007	Owens	Refinement of survival prediction in patients undergoing lower extremity bypass surgery: Stratification by chronic kidney disease classification	Examine the prognostic significance of the chronic kidney disease (CKD) classification on survival, limb salvage, and graft patency in patients undergoing lower extremity arterial reconstruction	United States of America	Inpatient (hospital) setting (other than dialysis)	Surgery	First-time, lower extremity vein bypass surgery	5 years or more	No	Prevention and management	Cohort study	Observational	1995	2004	Less than 75% (but 10 or more participants had ESRD and results for this specific group are available)	72	52.8	64.6	Haemodialysis	No	Combination of participants with and without diabetes		Limb salvage at 1 and 5 years was 82% +/-5% and 50% +/-12%, respectively.		Perioperative events within 30 days included 5 wound complications. , Primary patency at 1 and 5 years was 70% +/-6% and 63% +/-7%, respectively. , Secondary patency at 1 and 5 years was 80% +/-5% and 61% +/-10%, respectively.			0	1	0	1	0	2
Park YH, Song JH, Choi GW, Kim HJ. Predictors of complication following lower extremity amputation in diabetic end‐stage renal disease. Nephrology (Carlton). 2018;23(6):518-22. doi:10.1111/nep.13066.	2018	Park	Predictors of complication following lower extremity amputation in diabetic end-stage renal disease	Determine the factors that influence complications following lower extremity amputation (LEA) in patients with diabetic end-stage renal disease (ESRD)	Korea	Inpatient (hospital) setting (other than dialysis)	Surgery	Above or below knee amputation	Not reported	No	Prevention and management	Case series	Observational	2009	2015	Equal to or greater than 75%	41	54	62.9	Haemodialysis and peritoneal dialysis	No	All had diabetes	In 30 (65%) of the 46 amputations, the wound healed with no complications (no complication group., Five amputations(11%) required local wound care or oral antibiotics without subsequent consequences (minor complication group)., Minor wound issues were all identified within 2 weeks after surgery. All of these resolved within 9 weeks of treatment.	In 30 (65%) of the 46 amputations, the wound healed with no complications (no complication group). Five amputations (11%) required local wound care or oral antibiotics without subsequent consequences (minor complication group). Minor wound issues were all identified within 2 weeks after surgery. All of these resolved within 9 weeks of treatment. , Four amputations required irrigation, debridement…	Five amputations(11%) required local wound care or oral antibiotics without subsequent consequences (minor complication group).		Eleven amputations (24%) were complicated byre-hospitalization requiring surgical intervention, further amputation, or life threatening morbidity (including sepsis or mortality) (major complication group).		1	1	1	0	1	4
Peltonen S, Biancari F, Lindgren L, Mäkisalo H, Honkanen E, Lepäntalo M. Outcome of infrainguinal bypass surgery for critical leg ischaemia in patients with chronic renal failure. Eur J Vasc Endovasc Surg. 1998;15(2):122-7. doi:10.1016/S1078-5884(98)80132-9.	1998	Peltonen	Outcome of Infrainguinal Bypass Surgery for Critical Leg Ischaemia in Patients with Chronic Renal Failure	To determine whether infrainguinaI bypass surgery is worthwhile in patients with critical limb ischaemia (CLI) and chronic renal failure	Finland	Inpatient (hospital) setting (other than dialysis)	Surgery	InfrainguinaI bypass surgery	1 year to less than 2 years	No	Prevention and management	Cohort study	Observational	1991	1995	Less than 75% (but 10 or more participants had ESRD and results for this specific group are available)	10	50	60	Not reported	Yes	Combination of participants with and without diabetes		Leg salvage rate was 37%. None of the patients were alive with salvaged legs 4 months after revascutarisation. ,		Surgical complications were experienced by 3 patients (27%), including wound edge necrosis (1, 9%), deep infection (1, 9%) and haematoma (1, 9%). Postoperatively 2 patients experienced graft occlusion (18%). , The 1-year patency rate, was 47%.			0	1	0	1	0	2
Peregrin JH, Kožnar B, Kováč J, Laštovičková J, Novotný J, Vedlich D et al. PTA of Infrapopliteal Arteries: Long-term Clinical Follow-up and Analysis of Factors Influencing Clinical Outcome. Cardiovasc Intervent Radiol. 2010;33(4):720-5. doi:10.1007/s00270-010-9881-3.	2010	Peregrin	PTA of Infrapopliteal Arteries: Long-term Clinical Follow-up and Analysis of Factors Influencing Clinical Outcome	to evaluate clinical and morphological factors that influence the clinical outcome of percutaneous transluminal angioplasty in long-term follow-up., Our primary goal was to correlate the clinical condition of a treated lower limb and its anatomic status with the 1-year clinical outcome of the procedure. A secondary goal of our study was to evaluate the 10-year clinical outcomes of infra-popliteal…	Czech Republic	Inpatient (hospital) setting (other than dialysis)	Surgery	Infrapopliteal percutaneous transluminal angioplasty	5 years or more	No	Prevention and management	Cohort study	Observational	1999	2007	Less than 75% (but 10 or more participants had ESRD and results for this specific group are available)	200	48	63	Not reported	No	Presence or absence of diabetes not specified		For patients with diabetes and dialysis, 1-year primary and secondary lower limbs salvage rates were 66.5% and 67.4%, respectively					0	1	0	0	0	1
Pollard J, Hamilton GA, Rush SM, Ford LA. Mortality and Morbidity After Transmetatarsal Amputation: Retrospective Review of 101 Cases. J Foot Ankle Surg. 2006;45(2):91-7. doi:10.1053/j.jfas.2005.12.011.	2006	Pollard	Mortality and Morbidity After Transmetatarsal Amputation: Retrospective Review of 101 Cases	Report our results after transmetatarsal amputation (TMA) in a large diabetic and dysvascular patient population. Associated co-morbidities were examined for statistical significance in either complication or healing rate	United States of America	Inpatient (hospital) setting (other than dialysis)	Surgery	Transmetatarsal amputation (TMA)	2 years to less than 5 years	No	Prevention and management	Cohort study	Observational	1993	2004	Less than 75% (but 10 or more participants had ESRD and results for this specific group are available)	36	48	63	Not reported	No	Presence or absence of diabetes not specified		44.4% of patients achieved a healed stump., 39.4% of patients progressed to more proximal amputation.					0	1	0	0	0	1
Popp W, Knoll F, Sprenger-Mähr H, Zitt E, Lhotta K. Alprostadil treatment of critical limb ischemia in hemodialysis patients: A retrospective single-center analysis. Wien Klin Wochenschr. 2019;131(9-10):209-15. doi:10.1007/s00508-018-1407-z.	2019	Popp	Alprostadil treatment of critical limb ischemia in hemodialysis patients	To better define the efficacy of alprostadil in patients with peripheral artery disease (PAD) undergoing chronic hemodialysis treatment	Austria	Dialysis unit	Medication	prostanoid analogue alprostadil as an infusion during hemodialysis	1 year to less than 2 years	No	Prevention and management	Cohort study	Observational	2000	2013	Equal to or greater than 75%	86	69.7	70.5	Haemodialysis	No	Combination of participants with and without diabetes		31 patients (36%) underwent amputation within 1 year. Of the amputations only 7 were classified as major (above the ankle) and 24 were minor amputations. 1-year mortality or amputation was significantly associated with male sex and dialysis vintage, while the presence of diabetes was of borderline significant.		Despite alprostadil treatment 31 patients (36.0%) needed an endovascular procedure and 14 (16.3%) underwent by-pass surgery			0	1	0	1	0	2
Prasad R, Kamath T, Ginsberg C, Potok OA, Ix JH, Garimella PS et al. The association of the ankle‐brachial index, the toe‐brachial index, and their difference, with mortality and limb outcomes in dialysis patients. Hemodial Int. 2019;23(2):214-22. doi:10.1111/hdi.12734.	2019	Prasad	The association of the ankle-brachial index, the toe-brachial index, and their difference, with mortality and limb outcomes in dialysis patients	Examine both ankle-brachial index (ABI) and toe-brachial index (TBI) in dialysis patients referred for vascular studies, to determine the utility of each measure individually as well as the ABI-TBI	United States of America	Outpatient setting (other than dialysis)	Screening by a health professional	Ankle-brachial index (ABI) and toe-brachial index (TBI)	2 years to less than 5 years	No	Prevention and management	Cohort study	Observational	2009	2017	Equal to or greater than 75%	37	100	65	Haemodialysis and peritoneal dialysis	No	Combination of participants with and without diabetes		MALE (either revascularization or amputation in the lower limbs): The receiver operating characteristic curve for ABI-TBI associated with MALE resulted in an optimal cut point of 0.54 with sensitivity of 47% and specificity of 75% (c-statistic: 0.56). There was no statistical difference in MALE risk when stratified by the median ABI-TBI of 0.46 although the risk of MALE seemed greater in those wi…		MALE (either revascularization or amputation in the lower limbs): The receiver operating characteristic curve for ABI-TBI associated with MALE resulted in an optimal cut point of 0.54 with sensitivity of 47% and specificity of 75% (c-statistic: 0.56). There was no statistical difference in MALE risk when stratified by the median ABI-TBI of 0.46 although the risk of MALE seemed greater in those wi…			0	1	0	1	0	2
Prentice D, Ritchie L, Crandall J, Harwood L, McAuslan D, Lawrence-Murphy JA et al. Implementation of a diabetic foot management best practice guideline (BPG) in hemodialysis units. CANNT journal (1996). 2009;19(4):20-4.	2009	Prentice	Implementation of a diabetic foot management best practice guideline (BPG) in hemodialysis units	Examine the impact of introducing the Registered Nurses' Association of Ontario Best Practice Guidelines (BPG), Assessment and management of foot ulcer incidence, recurrence, and amputation rate in adult diabetic clients who are undergoing chronic hemodialysis treatments.	Canada	Dialysis unit	Screening by a health professional	€œLunch and learn € sessions for hemodialysis nurses, including new practice protocol involving foot assessments of all clients on admission and monthly assessments for high risk clients. A "quick tip" card was given to nurses outlining the change in care protocol. Two nurses on each unit received additional education and acted as resources for peers. A patient pamphlet and video on foot care we…	1 year to less than 2 years	No	Prevention and management	Non-randomised controlled study	Experimental	2005	Not reported	Equal to or greater than 75%	57	57.9	64.2	Haemodialysis	No	All had diabetes	For patients who presented with an ulcer at time one, results from the one-tailed Wilcoxon's paired signed-ranks test showed a significant reduction (p<0.05) in the number of wounds at time two and time three. Additionally, there was an improvement in the Texas grade of wounds (p<0.01) at time two and time three. However, no significant improvement in the Texas staging of the wound was noted.	There were five new amputations noted from time one to time three (one toe amputation, one above-the-knee amputation and three below-the-knee amputations) on five patients. Due to the small sample size, further statistical analysis was not conducted.					1	1	0	0	0	2
Rabellino M, Aragón-Sánchez J, González G, Zander T, Baldi S, Garcia-Nielsen L et al. Is endovascular revascularisation worthwhile in diabetic patients with critical limb ischemia who also have end-stage renal disease? Diabetes Res Clin Pract. 2010;90(3):e79-e81. doi:10.1016/j.diabres.2010.09.021.	2010	Rabellino	Is endovascular revascularisation worthwhile in diabetic patients with critical limb ischemia who also have end-stage renal disease?	Present the outcomes of endovascular treatment of diabetics patients with critical limb ischemia who have end-stage renal	Spain	Not reported	Surgery	endovascular revascularisation	1 year to less than 2 years	No	Prevention and management	Cohort study	Observational	2003	2009	Equal to or greater than 75%	55	60	68	Haemodialysis	No	All had diabetes	13 of 24 lesions (54.1%) healed during the follow-up.	Limb salvage was achieved in 41 limbs (58.6%). , 17 limbs which were saved had not presented lesions and 24 had presented lesions. 13 of these 24 lesions (54.1%) healed during the follow-up. 29 limbs (41.4%) underwent major amputations during follow-up. The cumulative number of major amputations was7 amputations (10%) of limbs at 1 month; 11 (15.7%) at 3months; 17 (24.2%) at 6 months, 24 (34.2%) …		Success of the technique was achieved in 91.8% of treated limbs. In nine limbs (12.3%) a second treatment was required. Three minor complications at the puncture site were recorded (4.1%); 2 hematoma and one pseudoaneurysm. ,			1	1	0	1	0	3
Ramanan B, Jeon-Slaughter H, Chen X, Modrall JG, Tsai S. Comparison of open and endovascular procedures in patients with critical limb ischemia on dialysis. J Vasc Surg. 2019;70(4):1217-24. doi:10.1016/j.jvs.2018.12.054.	2019	Ramanan	Comparison of open and endovascular procedures inpatients with critical limb ischemia on dialysis	Examine perioperative outcomes of lower extremity endovascular revascularization (ER) and open revascularization (OR) in dialysis patients with critical limb ischemia (CLI)	United States of America	Inpatient (hospital) setting (other than dialysis)	Surgery	Endovascular revascularization (ER) or open revascularization (OR)	Less than 6 months	Yes	Prevention and management	Cohort study	Observational	2011	2015	Equal to or greater than 75%	1021	61.5	66	Not reported	No	Combination of participants with and without diabetes		Thirty day postoperative outcomes found 64 endovascular revascularisations (10.54%) and 30 open revascularisations (5.56%) required major amputation. , Analysis of the open revascularization (OR) group showed that the level of the distal target for the bypass did not correlate with major amputation on univariate analysis (P=.81)., Open revascularization (OR) was associated with a lower rate of ma…		Open revascularization (OR) was associated with a higher rate of postoperative bleeding (29.6% vs 8.97%; odds ratio, 2.86; 95% CI, 1.8-4.35) and wound com-plications (15% vs 3%; odds ratio, 4.5; 95% CI, 2.38-8.3)	ER patientshad a shorter hospital length of stay (mean of 9 days vs14 days, p<0.01) than OR patients and were more likely to be discharged to home (63% vs 38%, p <0.01).		0	1	0	1	1	3
Ramdev P, Rayan SS, Sheahan M, Hamdan AD, LoGerfo FW, Akbari CM et al. A decade experience with infrainguinal revascularization in a dialysis-dependent patient population. J Vasc Surg. 2002;36(5):969-74. doi:10.1067/mva.2002.128297.	2002	Ramdev	A decade experience with infrainguinal revascularization in a dialysis-dependent patient population	Determine whether any risk factors exist that may preclude lower extremity (LE) revascularization in patients with dialysis-dependent ESRD with analysis of our outcome data over the previous decade	United States of America	Inpatient (hospital) setting (other than dialysis)	Surgery	Lower extremity bypass	5 years or more	No	Prevention and management	Cohort study	Observational	1990	1999	Equal to or greater than 75%	146	65	63	Haemodialysis and peritoneal dialysis	Yes	Combination of participants with and without diabetes		A total of 21 limbs (21 patients; 15%) underwent amputation. Of these, 11 (52%) had patent grafts at the time of amputation. The presence of heel ulceration significantly correlated with those patients with patent grafts at amputation (P=.03)., The limb salvage rates were 80% and 80% at 1 and 3 years.		Wound infection was experienced by 10%, wound necrosis by 1%, graft infection by 1% and graft thrombosis by 0.6%. , The actuarial graft primary and secondary patency rates at 1 and 3 years were 84% and 85%, and 64% and 68%, respectively., Heel gangrene did not impact primary graft patency. , Eight limbs (5%) underwent sequential bypass with prosthetic and autologous conduit because there was not …			0	1	0	1	0	2
Rao AMD, Baldwin MMD, Cornwall JMD, Marin MMD, Faries PMD, Vouyouka AMD. Contemporary outcomes of surgical revascularization of the lower extremity in patients on dialysis. J Vasc Surg. 2017;66(1):167-77. doi:10.1016/j.jvs.2017.01.029.	2017	Rao	Contemporary outcomes of surgical revascularization of the lower extremity in patients on dialysis	Identify the perioperative morbidity and mortality and independent risk factors of mortality in dialysis patients undergoing open surgical revascularization of the lower extremity (OSRLE)	United States of America	Inpatient (hospital) setting (other than dialysis)	Surgery	Open Surgical Revascularization of the Lower Extremity	Less than 6 months	No	Prevention and management	Cohort study	Observational	2011	2014	Less than 75% (but 10 or more participants had ESRD and results for this specific group are available)	1623	62.8	66	Haemodialysis and peritoneal dialysis	Yes	Combination of participants with and without diabetes		Major amputation was required by 1.7% of patients.		Unplanned return to operating room was required by 6.1% of patients. 30-day conduit failure was experienced by 0.4% of patients.	Mean (SD) length of stay was 12.8 days (15.0). Unplanned readmission was required by 5.2% of patients., Dialysis patients who underwent a femoral-distal bypass had the worst outcomes in regard to rates of unplanned reoperations(7.9% vs 3.9%;P<.01)., Dialysis patients who underwent a femoral-distal bypass had the worst outcomes in regard to unplanned readmissions (6.2%vs 3.7%;P<.01), and increased…		0	1	0	1	1	3
Reda ABA, Hurton SB, Embil JMMD, Smallwood SRN, Thomson LRN, Zacharias JMD et al. Effect of a preventive foot care program on lower extremity complications in diabetic patients with end-stage renal disease. Foot Ankle Surg. 2012;18(4):283-6. doi:10.1016/j.fas.2012.05.002.	2012	Reda	Effect of a preventive foot care program on lower extremity complications in diabetic patients with end-stage renal disease	To evaluate lower extremity problems of hemodialysis patients, including the lower extremity complications from diabetes, and to compare the frequency of complications in patients receiving the foot care program with patients evaluated before initiation of the foot care program	Canada	Dialysis unit	Care from one or more health professionals	Foot care program including regular assessments by a foot care nurse and patient education	Not reported	Yes	Prevention and management	Before and after study or interrupted time series	Observational	Not reported	Not reported	Equal to or greater than 75%	123	58	63	Haemodialysis	No	Combination of participants with and without diabetes	Rates of current foot ulceration remained stable, previously 28%, following intervention 16% (p-value non significant)	Rates of prevalent amputation remained stable, previously 27%, following intervention 16% (p-value non significant)		Rates of absent pedal pulses increased, previously 17%, following intervention 36% (p <0.0009)			1	1	0	1	0	3
Reddan DN, Marcus RJ, Owen WF, Szczech LA, Landwehr DM. Long-term outcomes of revascularization for peripheral vascular disease in end-stage renal disease patients. Am J Kidney Dis. 2001;38(1):57-63. doi:10.1053/ajkd.2001.25194.	2001	Reddan	Long-Term Outcomes of Revascularization for Peripheral Vascular Disease in End-Stage Renal Disease Patients	Analyse lower extremity revascularisation in patients with ESRD	United States of America	Inpatient (hospital) setting (other than dialysis)	Surgery	Bypass revascularisation	5 years or more	Yes	Management	Case control study	Observational	1992	1996	Less than 75% (but 10 or more participants had ESRD and results for this specific group are available)	20	55	67	Haemodialysis	No	Combination of participants with and without diabetes		Time to 50% limb loss was 1.24 years.		Time to 50% graft patency was 0.70 years. Symptomatic improvement was reported after 34% of procedures			0	1	0	1	0	2
Rith-Najarian S, Gohdes D, McGrath NM, Curran BA. Preventing amputations among patients with diabetes on dialysis. Diabetes Care. 2000;23(9):1445-6. doi:10.2337/diacare.23.9.1445.	2000	Rith-Najarian	Preventing Amputations Among Patients With Diabetes on Dialysis	To reduce diabetic foot complications in Native Ameri-can communities in northern Minnesota	United States of America	Outpatient setting (other than dialysis)	Other	Other: Measures were instituted to identify and protect diabetic community members with high-risk feet. Treatment guidelines and an outreach wound care clinic were introduced	Not reported	No	Prevention and management	Case series	Observational	1990	1999	Equal to or greater than 75%		48	63	Not reported	No	All had diabetes		Amputation rates decreased from 29 to 21 per 1,000diabetic person-years after measures to identify and protect diabetic community members with high-risk feet were introduced. Amputation rates then decreased to 15/1,000 when treatment guidelines were introduced. Amputation rates then decreased to 7/1,000 (P<0.001 vs. baseline) following the introduction of an outreach wound care clinic.					0	1	0	0	0	1
Rose JFDO, Giovinco NDPM, Mills JLMD, Najafi BP, Pappalardo JDPM, Armstrong DGDPMMDP. Split-thickness skin grafting the high-risk diabetic foot. J Vasc Surg. 2014;59(6):1657-63. doi:10.1016/j.jvs.2013.12.046.	2014	Rose	Split-thickness skin grafting the high-risk diabetic foot	Evaluate the outcomes of split-thickness skin graft placement in patients with chronic lower extremity wounds	United States of America	Inpatient (hospital) setting (other than dialysis)	Surgery	Split-thickness skin grafts	1 year to less than 2 years	No	Management	Case series	Observational	2007	2013	Less than 75% (but 10 or more participants had ESRD and results for this specific group are available)	13	61.5	64.2	Not reported	No	Presence or absence of diabetes not specified	9 (69.2%) fully healed, 6 (46.2%) required surgical revision, 4 (30.7%) remained unhealed.	0 (0.0%) required amputation					1	1	0	0	0	2
Sakurai T, Kobayashi M, Harasawa H, Itoh A, Yamazaki C, Masuko K. Infrainguinal arterial reconstruction in end-stage renal disease. Cardiovasc Surg. 1995;3(1):46-9. doi:10.1016/0967-2109(95)92902-t.	1995	Sakurai	Infrainguinal arterial reconstruction in end-stage renal disease	Describe surgical outcomes of infrainguinal reconstruction for critical ischaemia in patients with end-stage renal disease and a result of diabetes mellitus	Japan	Inpatient (hospital) setting (other than dialysis)	Surgery	infrainguinal arterial reconstruction for critical ischaemia	1 year to less than 2 years	No	Prevention and management	Cohort study	Observational	1988	1993	Equal to or greater than 75%	11	64	60.5	Haemodialysis	No	All had diabetes	Healing of ischemic foot ulcerations and transmetatarsal amputation wounds was not demonstrated in five limbs 30 days after vascular reconstruction despite patent bypass graft. , The remaining four patients improved	Minor amputation was performed successfully on three limbs in two patients with small ischaemic ulcers or gangrene. , Bilateral below knee amputation was required in one patient.		No graft failures occurred during the period of observation. Ischaemic foot pain decreased in five limbs with ischaemic foot ulcers and transmetatarsal amputation wounds 30 days after surgery. Patients with rest pain or disabling claudication were revascularized successfully. , Ankle-brachial pressure index was not useful to evaluate the severity of foot ischaemia or to predict the efficacy of by…			1	1	0	1	0	3
Salim M. Clinical outcomes among patients with chronic kidney disease hospitalized with diabetic foot disorders: A nationwide retrospective study. Endocrinol Diabetes Metab J. 2021;4(3):e00277-n/a. doi:10.1002/edm2.277.	2021	Salim	Clinical outcomes among patients with chronic kidney disease hospitalized with diabetic foot disorders: A nationwide retrospective study	Explore the impact of non-dialysis and dialysis chronic kidney disease (CKD) on hospitalized patients with diabetes related foot ulcers/infections (DFUs/DFIs)	United States of America	Inpatient (hospital) setting (other than dialysis)	Other		Less than 6 months	No	Prevention and management	Cohort study	Observational	2017	2018	Less than 75% (but 10 or more participants had ESRD and results for this specific group are available)		65.9	58.7	Not reported	No	All had diabetes		25.1% required amputation, of which 6.0% were major amputation and 19.1% were minor amputation.	The sepsis rate was 2.3%		Mean length of stay was 7.67 days (95% CI 7.37-7.97).		0	1	1	0	1	3
Sanchez LA, Goldsmith J, Rivers SP, Panetta TF, Wengerter KR, Veith FJ. Limb salvage surgery in end stage renal disease: is it worthwhile? J Cardiovasc Surg (Torino). 1992;33(3):344-8.	1992	Sanchez	Limb salvage surgery in end stage renal disease: Is it worthwhile?	Review experience with 54 primary and 15 secondary revascularizations for limb salvage in patients with end stage renal disease (ESRD)	United States of America	Inpatient (hospital) setting (other than dialysis)	Surgery	Bypass arterial reconstruction	5 years or more	No	Prevention and management	Cohort study	Observational	1980	1990	Equal to or greater than 75%	47	64	58	Haemodialysis and peritoneal dialysis	Yes	Combination of participants with and without diabetes		The 2-year limb salvage rate was 71.4%, 15 amputations were performed in this group of patients, 6 with patent grafts, amputations were required due to progression of infection or gangrene., 5 patent grafts required ligation at the time of amputation for an infected/gangrenous lower extremity		The 2 year cumulative secondary graft patency rate was 56.2%. 1 graft ruptured and there were 7 wound infections			0	1	0	1	0	2
Saqib NUMD, Domenick NMD, Cho JSMD, Marone LMD, Leers SMD, Makaroun MSMD et al. Predictors and outcomes of restenosis following tibial artery endovascular interventions for critical limb ischemia. J Vasc Surg. 2013;57(3):692-9. doi:10.1016/j.jvs.2012.08.115.	2013	Saqib	Predictors and outcomes of restenosis following tibial artery endovascular interventions for critical limb ischemia	To examines the consequences and predictors of recurrent stenosis of Tibial Artery Endovascular Intervention's in the setting of critical limb ischemia (CLI) and its effect on wound healing and limb salvage.	United States of America	Inpatient (hospital) setting (other than dialysis)	Surgery	Tibial artery endovascular intervention	1 year to less than 2 years	No	Prevention and management	Cohort study	Observational	2004	2010	Less than 75% (but 10 or more participants had ESRD and results for this specific group are available)	41	48	63	Not reported	No	Presence or absence of diabetes not specified		11 patients (27%) required major amputation		21 patients (51%) experienced restenosis			0	1	0	1	0	2
Schanzer AMD, Mega JMDMPH, Meadows JMDMPH, Samson RHMD, Bandyk DFMD, Conte MSMD. Risk stratification in critical limb ischemia: Derivation and validation of a model to predict amputation-free survival using multicenter surgical outcomes data. J Vasc Surg. 2008;48(6):1464-71. doi:10.1016/j.jvs.2008.07.062.	2008	Schanzer	Risk stratification in critical limb ischemia: Derivation and validation of a model to predict amputation-free survival using multicenter surgical outcomes data	Develop and then validate a precise and easy-to-use prognostic risk index for amputation free survival (AFS) in a population of critical limb ischemia (CLI) patients selected to undergo surgical revascularization	United States of America	Inpatient (hospital) setting (other than dialysis)	Surgery	Infra-inguinal bypass (IB) with autogenous vein	1 year to less than 2 years	No	Prevention and management	Cohort study	Observational	2001	2003	Less than 75% (but 10 or more participants had ESRD and results for this specific group are available)	170	48	63	Not reported	No	Presence or absence of diabetes not specified		Amputation free survival rate was 49.3%					0	1	0	0	0	1
Schweitzer CD, Anagnostakos JP, Nagarsheth KH. Frailty as a Predictor of Adverse Outcomes After Peripheral Vascular Surgery in Patients With End-Stage Renal Disease. Am Surg. 2022;88(4):686-91. doi:10.1177/00031348211047476.	2022	Schweitzer	Frailty as a Predictor of Adverse Outcomes After Peripheral Vascular Surgery in Patients With End-Stage Renal Disease	Assess the impact of concomitant End Stage Renal Disease and frailty on outcomes in patients undergoing lower extremity vascular bypass operations (LEO)	United States of America	Inpatient (hospital) setting (other than dialysis)	Surgery	lower extremity vascular bypass operations (LEO)	Less than 6 months	No	Prevention and management	Cohort study	Observational	2014	2018	Less than 75% (but 10 or more participants had ESRD and results for this specific group are available)	1718	48	63	Not reported	No	Presence or absence of diabetes not specified			Severe complications (including infection) were experienced by 587 patients (34.2%)	Reoperation within 30 days was experienced by 393 patients (22.9%)	Length of stay greater than 14 days was experienced by 241 patients (14.1%). Readmission within 30 days was experienced by 415 patients (24.2%)		0	0	1	1	1	3
Serizawa FMDP, Sasaki SMDP, Fujishima SRN, Akamatsu DMDP, Goto HMDP, Amada NMDP. Mortality rates and walking ability transition after lower limb major amputation in hemodialysis patients. J Vasc Surg. 2016;64(4):1018-25. doi:10.1016/j.jvs.2016.03.452.	2016	Serizawa	Mortality rates and walking ability transition after lower limb major amputation in hemodialysis patients	Evaluate short-term and long-term mortality and walking ability after major amputation in hemodialysis patients	Japan	Inpatient (hospital) setting (other than dialysis)	Surgery	First major amputation	5 years or more	No	Prevention and management	Cohort study	Observational	2005	2014	Equal to or greater than 75%	108	57	67.8	Haemodialysis	No	Combination of participants with and without diabetes		31 patients (29%) underwent additional major amputation of the ipsilateral (9 [29%]) or contralateral(22 [71%]) limb., The additional amputation free survival (AAFS) rates were 39%, 18%, and 9% at 1, 3, and 5 years, respectively. The median time between the first and second amputations was 2.5 months (5.7+/-7.6 months).,					0	1	0	0	0	1
Sheahan MG, Hamdan AD, Veraldi JR, McArthur CS, Skillman JJ, Campbell DR et al. Lower extremity minor amputations: The roles of diabetes mellitus and timing of revascularization. J Vasc Surg. 2005;42(3):476-80. doi:10.1016/j.jvs.2005.05.003.	2005	Sheahan	Lower extremity minor amputations: The roles of diabetes mellitus and timing of revascularization	Review a 12-year experience with lower extremity minor amputations and investigate which risk factors best predict patient survival and limb loss, for patients with peripheral vascular disease	United States of America	Inpatient (hospital) setting (other than dialysis)	Surgery	Minor, amputation, major amputation and revascularisation	2 years to less than 5 years	Yes	Prevention and management	Cohort study	Observational	1990	2001	Less than 75% (but 10 or more participants had ESRD and results for this specific group are available)	92	48	63	Not reported	No	Presence or absence of diabetes not specified		Unable to extract data					0	1	0	0	0	1
Shi E, Jex M, Patel S, Garg J. Outcomes of Wound Healing and Limb Loss After Transmetatarsal Amputation in the Presence of Peripheral Vascular Disease. J Foot Ankle Surg. 2019;58(1):47-51. doi:10.1053/j.jfas.2018.07.004.	2019	Shi	Outcomes of Wound Healing and Limb Loss After Transmetatarsal Amputation in the Presence of Peripheral Vascular Disease	Observe the impact of the timing of vascular intervention in patients undergoing transmetatarsal amputation, in treating forefoot gangrene and infection.	United States of America	Inpatient (hospital) setting (other than dialysis)	Surgery	Transmetatarsal amputation and revascularisation (bypass or endovascular) within 1 year	2 years to less than 5 years	Yes	Management	Cohort study	Observational	2010	Not reported	Less than 75% (but 10 or more participants had ESRD and results for this specific group are available)	42	48	63	Haemodialysis	No	Presence or absence of diabetes not specified		14 (33%) transmetatarsal head amputations healed. 28 (67%) required major amputation (experienced limb loss)					0	1	0	0	0	1
Shiota J, Ohura N, Higashikawa S, Yamato T, Kasahara H, Itatani K et al. Presepsin as a predictor of critical colonization in CLI hemodialysis patients: Presepsin detects critical colonization. Wound Repair Regen. 2016;24(1):189-94. doi:10.1111/wrr.12371.	2016	Shiota	Presepsin as a predictor of critical colonization in CLI hemodialysis patients	Investigate the validity of presepsin as an indicator and predictor for early detection of infectious critical limb ischemia (CLI)	Japan	Inpatient (hospital) setting (other than dialysis)	Screening by a health professional	Revascularization and plastic surgical treatment, followed by monitoring plasma presepsin	6 months to less than 1 year	No	Prevention and management	Cohort study	Observational	2014	2015	Equal to or greater than 75%	20	85	70.7	Haemodialysis	No	Combination of participants with and without diabetes	Healing was achieved by 9 out of 20 patients (45%). , The plasma presepsin level in the nonhealing group was significantly higher than that in the healing group (p<0.001), while there were no significant differences found in the serum CRP level and WBC count between the two groups. , A receiver operating characteristic curve analysis revealed that presepsin had highest accuracy (0.979) among vari…			Six of 9 patients in healing group had restenosis and revasucularization, and six of 11 patients in nohealing group had restenosis or revasucularization.			1	0	0	1	0	2
Shoji T, Inaba M, Fukagawa M, Ando R, Emoto M, Fujii H et al. Effect of Oral Alfacalcidol on Clinical Outcomes in Patients Without Secondary Hyperparathyroidism Receiving Maintenance Hemodialysis: The J-DAVID Randomized Clinical Trial. JAMA - J Am Med Assoc. 2018;320(22):2325-34. doi:10.1001/jama.2018.17749.	2018	Shoji	Effect of Oral Alfacalcidol on Clinical Outcomes in Patients Without Secondary Hyperparathyroidism Receiving Maintenance Hemodialysis: The J-DAVID Randomized Clinical Trial	Determine whether vitamin D receptor activators reduce cardiovascular events and mortality in patients without secondary hyperparathyroidism undergoing hemodialysis	Japan	Dialysis unit	Medication	0.5 Î¼g of oral alfacalcidol per day (intervention group) vs treatment without vitamin D receptor activators (control group)	2 years to less than 5 years	Yes	Prevention	Randomised controlled trial	Experimental	2008	2015	Equal to or greater than 75%	964	59.95	65	Haemodialysis	No	Combination of participants with and without diabetes		Amputation of an ischemic limb was experienced 4 times in the intervention group (0.8%) and 4 times in the control group (0.8%)		Intervention group - Leg artery intervention/bypass n=15 (3.1%) and Control group -Leg artery intervention/bypass=11 (2.3%), Absolute difference 95% Confidence Interval (CI) 0.76 ( ˆ’1.28 to 2.80) and Hazard ratio (95% CI) 1.40 (0.64-3.05)			0	1	0	1	0	2
Sigala F, Georgopoulos S, Langer S, Baunach C, Papalambros E, Sigalas K et al. Outcome of infrainguinal revascularization for critical limb ischemia in diabetics with end stage renal disease. Vasa. 2006;35(1):15-20. doi:10.1024/0301-1526.35.1.15.	2006	Sigala	Outcome of infrainguinal revascularization for critical limb ischemia in diabetics with end stage renal disease	Determine the results of arterial reconstruction in patients with end-stage renal disease and diabetes mellitus	Not reported	Inpatient (hospital) setting (other than dialysis)	Surgery	Endovascular or combined revascularization procedures	2 years to less than 5 years	No	Prevention and management	Cohort study	Observational	1999	2004	Equal to or greater than 75%	97	66	68	Not reported	No	All had diabetes		Limb salvage at 6 months was 85.6%, at 12 months75.3% and 56.3% at 2 years., The form of the reconstruction (surgical or endovascular) was not significantly related to amputation outcome (p = 0.75). Based on bivariate long-rank tests, significant relationships were detected between limb salvage and ejection fraction (p = 0.01), gangrene lesions (p < 0.01), infection (p = 0.04) and runoff arteries…		The primary patency at 6 months was 92.4% and 71.7% at 12 months. Patients without runoff arteries or with one runoff artery have eightfold greater likelihood of occlusion than those with two runoff arteries. Patients with one run-off artery had approximately 2,7 times higher likelihood of thrombosis than those with two run-off arteries. , Secondary patency at 6 months was 93.2% and72.7% at 12 mo…			0	1	0	1	0	2
Sigl M, Noe T, Ruemenapf G, Kraemer BK, Morbach S, Borggrefe M et al. Outcomes of severe limb ischemia with tissue loss and impact of revascularization in haemodialysis patients with wound, ischemia, and foot infection (WIfI) stage 3 or 4. Vasa. 2020;49(1):63-71. doi:10.1024/0301-1526/a000819.	2020	Sigl	Outcomes of severe limb ischemia with tissue loss and impact of revascularization in hemodialysis patients with wound, ischemia, and foot infection (WIFI) stage 3 or 4	Evaluate threatened limbs with Wound, Ischemia, and foot Infection (WIfI) clinical stage 3 or 4 for in-hospital treatment of peripheral arterial disease, limb salvage rates, major amputation (MA)-free and overall survival	Germany	Inpatient (hospital) setting (other than dialysis)	Surgery	Endovascular intervention, open surgical revascularization, hybrid approach and conservative management	5 years or more	No	Prevention and management	Cohort study	Observational	2001	2011	Equal to or greater than 75%	77	65	73.6	Haemodialysis	No	Combination of participants with and without diabetes		8 limbs had major amputation within 30 days (6 below-the-knee and 2 above-the-knee). The 1-year major amputation (MA) free limb salvage rate was 82%. A higher WIfI stage (HR 7.54; 95% CI,1.70 €“33.50; p=0.008) was associated with a significantly lower MA-free limb salvage rate, while revascularization (HR,0.17; 95% CI, 0.06 €“0.48; p=0.001) was associated with a significantly higher MA-free limb …	One patient with one threatened limb underwent urgent major amputation (MA) due to severe infection.	Direct flow to the wound site based on the angiosome concept could be restored in 30 (45%) of 66 successfully revascularized limbs. However, in 50 limbs, the wounds extended into adjacent angiosomes.			0	1	1	1	0	3
Silverberg D, Yalon T, Rimon U, Reinitz ER, Yakubovitch D, Schneiderman J et al. Endovascular treatment of lower extremity ischemia in chronic renal failure patients on dialysis: Early and intermediate term results. Isr Med Assoc J. 2013;15(12):734-8.	2013	Silverberg	Endovascular treatment of lower extremity ischemia in chronic renal Failure Patients on dialysis: early and intermediate term results	Present the experience of a single tertiary referral center in the treatment of dialysis patients with critical limb ischemia (CLI) or debilitating intermittent claudication who underwent endovascular therapy	Israel	Inpatient (hospital) setting (other than dialysis)	Surgery	Endovascular revascularization	1 year to less than 2 years	No	Prevention and management	Cohort study	Observational	2007	2011	Equal to or greater than 75%	41	70	68	Haemodialysis and peritoneal dialysis	No	Combination of participants with and without diabetes		Nineteen patients required major amputations. Estimated freedom from amputation was 65% at 1 year and 40% at 5 years. Average time to amputation was 6 months. Factors associated with a higher rate of amputation included presenting symptoms of non-healing wounds or gangrene (68% and 36%, respectively), and the presence of diabetes (P < 0.05). Treatment of all levels of disease encountered during t…		Technical success was achieved in all 17 iliac lesions (100%). Successful treatment was achieved for 31 SFA lesions (72%) and 21 below-the-knee/tibial arteries (42%). , 6 patients (14%) required re-interventions.			0	1	0	1	0	2
Simons JPMDMPH, Goodney PPMDMS, Nolan BWMDMS, Cronenwett JLMD, Messina LMMD, Schanzer AMD. Failure to achieve clinical improvement despite graft patency in patients undergoing infrainguinal lower extremity bypass for critical limb ischemia. J Vasc Surg. 2010;51(6):1419-24. doi:10.1016/j.jvs.2010.01.083.	2010	Simons	Failure to achieve clinical improvement despite graft patency in patients undergoing infrainguinal lower extremity bypass for critical limb ischemia	To describe the proportion of critical limb ischemia (CLI) patients who did not achieve symptomatic improvement 1 year after bypass, despite having patent grafts, and identify preoperative factors associated with this outcome	United States of America	Inpatient (hospital) setting (other than dialysis)	Surgery	Elective and urgent infrainguinal lower extremity bypass (iLEB)	1 year to less than 2 years	No	Prevention and management	Cohort study	Observational	2003	2007	Less than 75% (but 10 or more participants had ESRD and results for this specific group are available)	49	48	63	Not reported	No	Presence or absence of diabetes not specified	Clinical failure (persistent rest pain, tissue loss or ipsilateral major amputation at 1 year) was experienced by 14 of 49 patients (29%).	Clinical failure (persistent rest pain, tissue loss or ipsilateral major amputation at 1 year) was experienced by 14 of 49 patients (29%).					1	1	0	0	0	2
Simsir SA, Cabellon A, Kohlman-Trigoboff D, Smith BM. Factors influencing limb salvage and survival after amputation and revascularization in patients with end-stage renal disease. Am J Surg. 1995;170(2):113-7. doi:10.1016/S0002-9610(99)80267-0.	1995	Simsir	Factors influencing limb salvage and survival after amputation and revascularization in patients with end-stage renal disease	Identify factors that would facilitate the choice between attempted revascularization and amputation in patients with limb-threatening ischemia and dialysis-dependent renal failure	United States of America	Inpatient (hospital) setting (other than dialysis)	Surgery	Lower extremity revascularization or amputation for disabling claudicationi or critical lower-extremity ischemia	1 year to less than 2 years	Yes	Prevention and management	Cohort study	Observational	Not reported	Not reported	Equal to or greater than 75%	77	48	63	Not reported	Yes	Combination of participants with and without diabetes		Four revascularized patients required amputation in spite of a functioning graft. , 30-day limb salvage was achieved in 91% of surviving patients. Limb salvage required subsequent foot debridement or toe amputation 29% of surviving patients. , One-year limb salvage for the revascularized group was 67%. , In the amputation group, primary healing was achieved in 82% surviving below knee and 67% sur…		Immediate patency rate of 92% in the revascularized group., Postoperative wound complications occurred in more than half (54%) of the bypass procedures	Median hospital stay was 20 days for the revascularized group and 17 days for the amputation group. Median hospital charges were $55,000 and $52,000 for the revascularized and amputation groups respectively		0	1	0	1	1	3
Sioson ER, Kerfoot S, Ziat LM. Rehabilitation Outcome of Older Patients with End-Stage Renal Disease and Lower Extremity Amputation. J Am Geriatr Soc. 1993;41(6):667-8. doi:10.1111/j.1532-5415.1993.tb06742.x.	1993	Sioson	Rehabilitation outcome of older patients with end-stage renal disease and lower extremity amputation	Report the functional outcome of young elderly patients with ESRD following lower extremity amputation and rehabilitation	United States of America	Rehabilitation unit	Rehabilitation	Lower extremity rehabilitation and admitted for rehabilitation	1 year to less than 2 years	No	Management	Case series	Observational	1987	1990	Equal to or greater than 75%	12	58	66	Haemodialysis	No	Combination of participants with and without diabetes		Ten of the 12 patients (83%) were prosthetically restored. On discharge: two patients were fully independent (17%); six were ambulatory with supervision or assistance (50%); one required moderate assistance (8%); and, one was not ambulatory.			Average length of stay was 53.7 days.		0	1	0	0	1	2
Siracuse JJ, Gill HL, Jones DW, Schneider DB, Connolly PH, Parrack I et al. Risk Factors for Protracted Postoperative Length of Stay after Lower Extremity Bypass for Critical Limb Ischemia. Ann Vasc Surg. 2014;28(6):1432-8. doi:10.1016/j.avsg.2013.12.027.	2014	Siracuse	Risk Factors for Protracted Postoperative Length of Stay after Lower Extremity Bypass for Critical Limb Ischemia	To characterize length of stay (LOS) among patients with severe peripheral arterial disease (PAD), those undergoing surgical bypass for critical limb ischemia (CLI), and identify risk factors for protracted postoperative LOS	United States of America	Inpatient (hospital) setting (other than dialysis)	Surgery	Bypass surgery for critical limb ischemia	Less than 6 months	No	Management	Cohort study	Observational	2007	2009	Less than 75% (but 10 or more participants had ESRD and results for this specific group are available)	485	48	63	Haemodialysis	No	Presence or absence of diabetes not specified					Extended length of stay (identified as the top quartile of days hospitalized, from surgery until discharge for all included patients) was required by 236 of 485 dialysis patients (49%).		0	0	0	0	1	1
Smilowitz NR, Bhandari N, Berger JS. Chronic kidney disease and outcomes of lower extremity revascularization for peripheral artery disease. Atherosclerosis. 2020;297:149-56. doi:10.1016/j.atherosclerosis.2019.12.016.	2020	Smilowitz	Chronic Kidney Disease and Outcomes of Lower Extremity Revascularization for Peripheral Artery Disease	To characterize the association between chronic kidney disease (CKD) and/or end-stage renal disease (ESRD) and post-procedural outcomes in PAD patients undergoing lower extremity (LE) revascularization in the United States.	United States of America	Inpatient (hospital) setting (other than dialysis)	Surgery	Surgical or endovascular lower extremity revascularization	6 months to less than 1 year	No	Prevention and management	Cohort study	Observational	2014	2014	Less than 75% (but 10 or more participants had ESRD and results for this specific group are available)	3250	48	63	Haemodialysis and peritoneal dialysis	No	Combination of participants with and without diabetes					28% of patients were readmitted within 6 months with major adverse limb events (MALE).		0	0	0	0	1	1
Smolock CJ, El-Sayed HF, Davies MG. Outcomes of Femoropopliteal Interventions for Critical Ischemia in the Hemodialysis-Dependent Patient. Ann Vasc Surg. 2015;29(2):237-43. doi:10.1016/j.avsg.2014.07.036.	2015	Smolock	Outcomes of Femoropopliteal Interventions for Critical Ischemia in the Hemodialysis-Dependent Patient	Compare the outcomes of endoluminal interventions and surgical revascularization for superficial femoral artery (SFA) disease in hemodialysis-dependent patients	United States of America	Inpatient (hospital) setting (other than dialysis)	Surgery	open versus endovascular treatment of superficial femoral artery disease	5 years or more	Yes	Prevention and management	Cohort study	Observational	2000	2010	Equal to or greater than 75%	161	48	63	Haemodialysis	No	Combination of participants with and without diabetes		30 day major adverse limb event rate was 21% open group and 25% endovascular group., 30 day day major amputation rate was 8% open group and 18% endovascular group., Requirement for amputation included: no amputation 66% open, 60% endovascular; toe and/or forefoot, 10% open, 10% endovascular; major amputation 25% open (of which 44% were below and 56% were above knee), 30% endovascular (of which 37…		The technical failure rates were 0% and 4% for the open and endovascular groups, respectively., The change in ABI was greater in the endovascular group (change in ABI,0.69 ± 0.10 vs. 0.79 ± 0.23, open vs. endovascular;p = 0.0007). After intervention in the open and endovascular groups, an equal percentage of patients,86% and 86%, respectively, were considered to have improved or resolved symptoms…			0	1	0	1	0	2
Stone PA, Back MR, Armstrong PA, Flaherty SK, Keeling WB, Johnson BL et al. Midfoot Amputations Expand Limb Salvage Rates for Diabetic Foot Infections. Ann Vasc Surg. 2005;19(6):805-11. doi:10.1007/s10016-005-7973-3.	2005	Stone	Midfoot Amputations Expand Limb Salvage Rates for Diabetic Foot Infections	Report experience with transtarsal amputation to salvage nonhealing transmetatarsal (forefoot) amputation (TMAs) in diabetic patients	United States of America	Inpatient (hospital) setting (other than dialysis)	Surgery	Transtarsal amputation following failed transmetatarsal amputation	1 year to less than 2 years	No	Prevention and management	Cohort study	Observational	1996	2004	Less than 75% (but 10 or more participants had ESRD and results for this specific group are available)	20	48	63	Haemodialysis	Yes	All had diabetes		Only two of nine dialysis patients undergoing a revascularization procedure exhibited early (<3 months) healing of transmetatarsal / midfoot amputations. Midfoot healing was achieved by 50%. Only 50% avoided major amputation.					0	1	0	0	0	1
Stuart L, Kimmel L, Jolly A. Incidence of lower limb amputation in Central Australia. Aust Health Rev. 2021;45(3):361-7. doi:10.1071/AH20182.	2021	Stuart	Incidence of lower limb amputation in Central Australia	To review the demographic details of those who have undergone lower limb amputation (LLA) surgery in Central Australia and determine the region-specific age-adjusted incidence rate of LLA.	Australia	Inpatient (hospital) setting (other than dialysis)	Surgery	lower limb amputation	Not reported	No	Prevention and management	Cohort study	Observational	2012	2017	Less than 75% (but 10 or more participants had ESRD and results for this specific group are available)	66	48	63	Not reported	No	Combination of participants with and without diabetes		23 (35%) patients on dialysis had subsequent amputation.					0	1	0	0	0	1
Su C-L, Chang C-C, Peng Y-S, Chen M-Y. The Predictive Factors Associated With Comorbidities for Treatment Response in Outpatients With King Classification III Diabetes Foot Ulcers. Ann Plast Surg. 2018;81(6S Suppl 1):S39-S43. doi:10.1097/SAP.0000000000001500.	2018	Su	The Predictive Factors Associated With Comorbidities for Treatment Response in Outpatients With King Classification III Diabetes Foot Ulcers	The aim of this study is to investigate the preexisting predictive factors associated with comorbidities for diabetic foot ulcer (DFU) in King classification III at an outpatient clinic.	Taiwan	Outpatient setting (other than dialysis)	Care from one or more health professionals	Treated in a wound care center	1 year to less than 2 years	No	Prevention and management	Cohort study	Observational	2011	2011	Less than 75% (but 10 or more participants had ESRD and results for this specific group are available)	17	48	63	Not reported	No	All had diabetes	1 patient (6%) experienced wound failure (amputation or infection, need in-hospital medical service). 6 patients experienced wound stagnation (35%). 10 patients (59%) achieved wound success (healed or healing with wound reduction).	1 patient (6%) experienced wound failure (amputation or infection, need in-hospital medical service).	1 patient (6%) experienced wound failure (amputation or infection, need in-hospital medical service).		1 patient (6%) experienced wound failure (amputation or infection, need in-hospital medical service).		1	1	1	0	1	4
Suckow BD, Goodney PP, Cambria RA, Bertges DJ, Eldrup-Jorgensen J, Indes JE et al. Predicting Functional Status Following Amputation After Lower Extremity Bypass. Ann Vasc Surg. 2012;26(1):67-78. doi:10.1016/j.avsg.2011.07.014.	2012	Suckow	Predicting Functional Status Following Amputation After Lower Extremity Bypass	To better delineate the functional outcomes after major lower extremity amputation, as well as to identify the patient-level factors associated with achieving good functional status, patients who underwent lower extremity amputation after failed attempt at revascularization were studied	United States of America	Inpatient (hospital) setting (other than dialysis)	Surgery	Lower extremity amputation after open infrainguinal bypass	1 year to less than 2 years	No	Prevention and management	Cohort study	Observational	2003	2008	Less than 75% (but 10 or more participants had ESRD and results for this specific group are available)	226	48	63	Not reported	No	Presence or absence of diabetes not specified		12% of dialysis patients required minor amputation, 8% required below knee amputation and 8% required above knee amputation.					0	1	0	0	0	1
Suematsu N, Iida O, Takahara M, Yamauchi Y, Soga Y, Nakano M et al. Prognostic Factors in Hemodialysis Patients Undergoing Endovascular Treatment for Critical Limb Ischemia due to Isolated Below-the-Knee Disease. J Atheroscler Thromb. 2015;22(4):404-14. doi:10.5551/jat.25056.	2015	Suematsu	Prognostic Factors in Hemodialysis Patients Undergoing Endovascular Treatment for Critical Limb Ischemia due to Isolated Below-the-Knee Disease	To investigate the prognosis and to clarify the predictors of both patient and limb survival among hemodialysis (HD) patients with critical limb ischemia (CLI) due to isolated below-the-knee (BK) disease.	Japan	Inpatient (hospital) setting (other than dialysis)	Surgery	Endovascular treatment	1 year to less than 2 years	No	Prevention and management	Cohort study	Observational	2004	2011	Equal to or greater than 75%	546	76.9	69	Haemodialysis	No	Presence or absence of diabetes not specified		82 (12.0%) limbs underwent major amputation. Freedom from major amputation was 86.7%, 83.9% and 83.9% at one, three and five years, respectively. , Age ï¼œ60 years (pï¼œ0.001), non-ambulatory status (pï¼œ0.001), the Rutherford classification (pï¼œ0.001), HbA1c level of ‰¥7.0% (p=0.001), a serum albumin level of ï¼œ3.0 g/dL (p=0.006) and ï¼œ2 below the knee runoff vessels after endovascular therap…					0	1	0	0	0	1
Taylor LM, Jr., Hamre D, Dalman RL, Porter JM. Limb salvage vs amputation for critical ischemia. The role of vascular surgery. Arch Surg. 1991;126(10):1251-7; discussion 7-8. doi:10.1001/archsurg.1991.01410340093013.	1991	Taylor	Limb salvage vs amputation for critical ischemia	To examine the outcome of revascularization in various patient subgroups to determine if any can be identified in whom the outcome of revascularization is sufficiently poor that primary amputation appears preferable	United States of America	Inpatient (hospital) setting (other than dialysis)	Surgery	Vascular Surgery	1 year to less than 2 years	No	Prevention and management	Cohort study	Observational	1980	1990	Less than 75% (but 10 or more participants had ESRD and results for this specific group are available)	55	48	63	Not reported	No	Presence or absence of diabetes not specified		25 limbs (5%) experienced amputation after revascularisation occlusion, while 5 limbs (1%) experienced amputation despite patent revascularization. , Limb salvage rate was 82% at 1 year and 67% at 3 years. while numbers were too small at 5 years		The one-year primary patency rate was 80%, while the 3-year primary patency rate was 70%.			0	1	0	1	0	2
Taylor SM, Kalbaugh CA, Blackhurst DW, Cass AL, Trent EA, Langan EM et al. Determinants of functional outcome after revascularization for critical limb ischemia: An analysis of 1000 consecutive vascular interventions. J Vasc Surg. 2006;44(4):747-56. doi:10.1016/j.jvs.2006.06.015.	2006	Taylor	Determinants of functional outcome after revascularization for critical limb ischemia: An analysis of 1000 consecutive vascular interventions	Determine the importance of limb salvage on ultimate functional outcome and to assess other important determinants of functional outcome for patients after intervention for critical limb ischemia	United States of America	Inpatient (hospital) setting (other than dialysis)	Surgery	Lower extremity vascular interventions	5 years or more	No	Prevention and management	Cohort study	Observational	1998	2004	Less than 75% (but 10 or more participants had ESRD and results for this specific group are available)	102	48	63	Not reported	No	Presence or absence of diabetes not specified		The 1-year limb salvage rate was 57.3%.		The 1-year secondary patency rate was 57.5%. ,			0	1	0	1	0	2
Taylor SM, Kalbaugh CA, Blackhurst DW, Hamontree SE, Cull DL, Messich HS et al. Preoperative clinical factors predict postoperative functional outcomes after major lower limb amputation: An analysis of 553 consecutive patients. J Vasc Surg. 2005;42(2):227-34. doi:10.1016/j.jvs.2005.04.015.	2005	Taylor	Preoperative clinical factors predict postoperative functional outcomes after major lower limb amputation: An analysis of 553 consecutive patients	To investigate the relationship between a variety of preoperative clinical characteristics and postoperative functional outcomes in order to formulate treatment recommendations for patients requiring major lower limb amputation	United States of America	Inpatient (hospital) setting (other than dialysis)	Surgery	Major lower extremity amputations	2 years to less than 5 years	No	Management	Cohort study	Observational	1998	2003	Less than 75% (but 10 or more participants had ESRD and results for this specific group are available)		48	63	Not reported	No	Presence or absence of diabetes not specified		31.5% of patients went on to wear a prosthesis. 52.6% of patients maintained their preoperative ambulation status at 1 year.					0	1	0	0	0	1
Taylor SMMD, York JWMD, Cull DLMD, Kalbaugh CAMS, Cass ALMPH, Langan EMMD. Clinical success using patient-oriented outcome measures after lower extremity bypass and endovascular intervention for ischemic tissue loss. J Vasc Surg. 2009;50(3):534-41. doi:10.1016/j.jvs.2009.03.030.	2009	Taylor	Clinical success using patient-oriented outcome measures after lower extremity bypass and endovascular intervention for ischemic tissue loss	To retrospectively examine success after lower extremity revascularization for tissue loss using patient-oriented measures and to include patients who underwent both open surgical bypass and endovascular therapy	United States of America	Inpatient (hospital) setting (other than dialysis)	Surgery	Open bypass and endovascular therapy	Not reported	No	Prevention and management	Cohort study	Observational	1998	2005	Less than 75% (but 10 or more participants had ESRD and results for this specific group are available)	223	48	63	Not reported	No	Presence or absence of diabetes not specified	Clinical success (graft patency to the point of wound healing; limb salvage for 1 year; maintenance of ambulatory status for 1 year; and survival for 6 months) was not achieved by 157 patients (70%).	Clinical success (graft patency to the point of wound healing; limb salvage for 1 year; maintenance of ambulatory status for 1 year; and survival for 6 months) was not achieved by 157 patients (70%).		Clinical success (graft patency to the point of wound healing; limb salvage for 1 year; maintenance of ambulatory status for 1 year; and survival for 6 months) was not achieved by 157 patients (70%).			1	1	0	1	0	3
Taylor SMMDF, Cull DLMDF, Kalbaugh CAMS, Cass ALMPH, Harmon SA, Langan EMMDF et al. Critical Analysis of Clinical Success after Surgical Bypass for Lower-Extremity Ischemic Tissue Loss Using a Standardized Definition Combining Multiple Parameters: A New Paradigm of Outcomes Assessment. J Am Coll Surg. 2007;204(5):831-8. doi:10.1016/j.jamcollsurg.2007.01.037.	2007	Taylor	Critical Analysis of Clinical Success after Surgical Bypass for Lower-Extremity Ischemic Tissue Loss Using a Standardized Definition Combining Multiple Parameters: A New Paradigm of Outcomes Assessment	Construct a contemporary definition of clinical success after surgical revascularization, combining multiple parameters, to determine the rate of success using this definition, and to identify substantial clinical comorbidities that can be predictors of failure	United States of America	Inpatient (hospital) setting (other than dialysis)	Surgery	Lower extremity vascular intervention	1 year to less than 2 years	No	Prevention and management	Cohort study	Observational	1998	2004	Less than 75% (but 10 or more participants had ESRD and results for this specific group are available)	46	48	63	Not reported	No	Presence or absence of diabetes not specified	Impaired ambulatory patients with infrainguinal disease and end-stage renal disease had a 6.8% chance of success(graft patency to the point of wound healing; limb salvage for 1 year; maintenance of ambulatory status for 1 year; survival for 6 months).	Impaired ambulatory patients with infrainguinal disease and end-stage renal disease had a 6.8% chance of success(graft patency to the point of wound healing; limb salvage for 1 year; maintenance of ambulatory status for 1 year; survival for 6 months).		Impaired ambulatory patients with infrainguinal disease and end-stage renal disease had a 6.8% chance of success(graft patency to the point of wound healing; limb salvage for 1 year; maintenance of ambulatory status for 1 year; survival for 6 months). , Failure after bypass using a combined multiparameter definition of outcomes was experienced by , 35 (76%) patients.			1	1	0	1	0	3
Teymen B, Aktürk S. Drug‐Eluting Balloon Angioplasty for Below the Knee Lesions in End Stage Renal Disease Patients with Critical Limb Ischemia: Midterm Results. J Interv Cardiol. 2017;30(1):93-100. doi:10.1111/joic.12355.	2017	Teymen	Drug-Eluting Balloon Angioplasty for Below the Knee Lesions in End Stage Renal Disease Patients with Critical Limb Ischemia: Midterm Results	To investigate the efficacy and safety of paclitaxel drug-eluting balloon (DEB) for treatment of below the knee lesions in end stage renal disease patients (ESRD) with critical limb ischemia(CLI)	Turkey	Inpatient (hospital) setting (other than dialysis)	Surgery	paclitaxel drug-eluting balloon (DEB)	1 year to less than 2 years	No	Prevention and management	Cohort study	Observational	2012	2015	Equal to or greater than 75%	44	54.5	58	Haemodialysis	No	Combination of participants with and without diabetes	Wound healing was seen in 85.7% of patients	There were 6 amputations involving 6 patients. Five amputations were minor amputations (13.5%), of which all planned by the vascular surgeon prior to endovascular treatment. One (2.7%) major amputation occurred in Rutherford category 6 at baseline		Technical success (defined as restoration of direct flow in the target vessel and a residual stenosis less then 30%) rate was 96.4%., Stent implantation was necessary in 2 patients because of a residual stenosis of 50% or dissection affecting flow., There were 8 cases of restenosis and 6 cases of reocclusion (N=14, 62.2% patency). Average time to first reintervention was 6.5+/-3.1 months., A sign…			1	1	0	1	0	3
Tokuda T, Hirano K, Sakamoto Y, Mori S, Kobayashi N, Araki M et al. Use of the Wound, Ischemia, foot Infection classification system in hemodialysis patients after endovascular treatment for critical limb ischemia. J Vasc Surg. 2018;67(6):1762-8. doi:10.1016/j.jvs.2017.09.037.	2018	Tokuda	Use of the Wound, Ischemia, foot Infection classification system in hemodialysis patients after endovascular treatment for critical limb ischemia	To evaluate the prognostic value of the Wound, Ischemia, foot Infection (WIfI) classification system stages in Hemodialysis (HD) patients with critical limb ischemia (CLI) who had been treated with endovascular therapy (EVT). To clarify the wound healing rate and amputation-free survival in HD patients classified by the WIfI classifiation system	Japan	Inpatient (hospital) setting (other than dialysis)	Surgery	infrapopliteal endovascular intervention	2 years to less than 5 years	No	Prevention and management	Cohort study	Observational	2007	2015	Equal to or greater than 75%	163	67	72	Haemodialysis	No	Combination of participants with and without diabetes	The wound healing rates at 1 year were 92%, 70%, 75%, and 42% in the very-low-risk, low-risk, moderate-risk, and high-risk groups, respectively. , Time to wound healing in days was: Very low risk 112+/-93, low risk 133+/-117, moderate risk 150+/-139 and high risk 237+/-233	The number of major amputations was 0(0%), 3(10%), 6(10.7%), and 21(34.4%) in the very-low-risk, low-risk, moderate-risk, and high-risk groups, respectively., The number of minor amputations was 5(31.3%), 9(30.0%), 20(35.7%), and 13(21.3%) in the very-low-risk, low-risk, moderate-risk, and high-risk groups, respectively. , The 1-year amputation-free survival among the groups was 76%,58%, 61%, and…		126 patients (77%) were shown to increase the perfusion compared with the preprocedural time evaluating ankle-brachial index or skin perfusion pressure			1	1	0	1	0	3
Tokuda T, Oba Y, Koshida R, Kagase A, Matsuda H, Suzuki Y et al. Validation of Global Limb Anatomical Staging System (GLASS) in patients with hemodialysis and Chronic Limb-Threatening Ischemia after endovascular treatment. Heart Vessels. 2021;36(6):809-17. doi:10.1007/s00380-020-01747-1.	2021	Tokuda	Validation of Global Limb Anatomical Staging System (GLASS) in patients with hemodialysis and Chronic Limb €‘Threatening Ischemia after endovascular treatment	to validate the global limb anatomical staging system (GLASS) stage into chronic limb-threatening ischemia (CLTI) patients on hemodialysis (HD) and investigate the impact of GLASS stage to wound healing and amputation-free survival (AFS)	Japan	Inpatient (hospital) setting (other than dialysis)	Surgery	Endovascular treatment	1 year to less than 2 years	No	Prevention and management	Cohort study	Observational	2009	2018	Equal to or greater than 75%	154	48	63	Haemodialysis	No	Combination of participants with and without diabetes	Wound healing at 1 year was 43% for GLASS I, 42% for GLASS II and 41% for GLASS III (p = 0.97). Diabetes mellitus (HR 2.4, 95% CI 1.37 €“4.01, p <0.01) and higher Wound Ischaemia Foot Infection (WIfI) (HR 2.3, 95% CI 1.04 €“6.01, p=0.04) were the predictors of non-wound healing. GLASS stage did not predict wound healing.	Major amputation at 1 year was 11% for GLASS I, 11% for GLASS II and 16% for GLASS III (p = 0.67)		Successful revascularisation was achieved at 94% for GLASS I, 95% for GLASS II and 59% for GLASS III (p <0.01)			1	1	0	1	0	3
Toursarkissian B, Shireman PK, Harrison A, D'Ayala M, Schoolfield J, Sykes MT. Major Lower-Extremity Amputation: Contemporary Experience in a Single Veterans Affairs Institution. Am Surg. 2002;68(7):606-10. doi:10.1177/000313480206800710.	2002	Toursarkissian	Major lower-extremity amputation contemporary experience in a single veterans affairs institution	To describe the current experiences with majority lower extremity amputations secondary to vascular disease, and to analyze local outcomes in terms of morbidity, mortality and function and identify areas needing further attention	United States of America	Inpatient (hospital) setting (other than dialysis)	Surgery	Major lower-extremity amputation	6 months to less than 1 year	Yes	Management	Cohort study	Observational	1998	2000	Less than 75% (but 10 or more participants had ESRD and results for this specific group are available)	26	48	63	Not reported	No	Presence or absence of diabetes not specified		5% of dialysis patients were ambulatory after amputation secondary to vascular disease.		5% of dialysis patients were ambulatory after amputation secondary to vascular disease.			0	1	0	1	0	2
Townley WA, Carrell TWG, Jenkins MP, Wolfe JHN, Cheshire NJW. Critical Limb Ischemia in the Dialysis-Dependent Patient: Infrainguinal Vein Bypass Is Justified. Vasc Endovascular Surg. 2006;40(5):362-6. doi:10.1177/1538574406293739.	2006	Townley	Critical limb ischemia in the dialysis-dependent patient: Infrainguinal vein bypass is justified	To determine whether infrainguinal bypass can be justified in selected patients in end-stage renal failure presenting with critical limb ischemia.	United Kingdom (England, Scotland, Wales, Northern Ireland)	Inpatient (hospital) setting (other than dialysis)	Surgery	Infrainguinal bypass	2 years to less than 5 years	No	Prevention and management	Cohort study	Observational	1996	2003	Equal to or greater than 75%	17	83	62	Haemodialysis and peritoneal dialysis	No	Combination of participants with and without diabetes		25 patients had primary major amputations of 32 limbs. , The limb salvage rate was 66% at 1 year. Seventy-five percent (18/24) of operated on limbs (15/17 of vein grafts) avoided major amputation at follow-up or death.		There were 5 early graft occlusions (21%) all in bypass with polytetrafluoroethylene conduit. 3 (13%) patients had postoperative wound infection.	Median in-hospital stay was 59 days in the bypass group and 46 days in the amputation group.		0	1	0	1	1	3
Toyoshima T, Iida O, Hata Y, Okamoto S, Ishihara T, Nanto K et al. Effects of Infra-malleolar Status According to Global Limb Anatomic Staging System on Clinical Outcomes in Patients With Chronic Limb-Threatening Ischemia. Angiology. 2022:33197221091642. doi:10.1177/00033197221091642.	2022	Toyoshima	Effects of Infra-malleolar Status According to Global Limb Anatomic Staging System on Clinical Outcomes in Patients With Chronic Limb-Threatening Ischemia	To investigate the association of infra-malleolar (IM) classification with clinical outcomes in patients with chronic limb-threatening ischemia (CLTI) due to isolated infrapopliteal (IP) lesions	Japan	Inpatient (hospital) setting (other than dialysis)	Surgery	Endovascular therapy	1 year to less than 2 years	No	Management	Cohort study	Observational	2010	2018	Less than 75% (but 10 or more participants had ESRD and results for this specific group are available)	216	48	63	Haemodialysis	No	Presence or absence of diabetes not specified	Wound healing rate was 45%, while non-healing was 55%						1	0	0	0	0	1
Treiman GS, Lawrence PF, Rockwell WB. Autogenous arterial bypass grafts: Durable patency and limb salvage in patients with inframalleolar occlusive disease and end-stage renal disease. J Vasc Surg. 2000;32(1):13-22. doi:10.1067/mva.2000.107312.	2000	Treiman	Autogenous arterial bypass grafts: Durable patency and limb salvage in patients with inframalleolar occlusive disease and end-stage renal disease	To determine whether autogenous arterial grafts to distal pedal arteries improve the patency of grafts and limb salvage in patients with end-stage renal disease and nonhealing ischemic wounds and to better define the indications for autogenous arterial grafts	United States of America	Inpatient (hospital) setting (other than dialysis)	Surgery	autogenous arterial grafts to distal pedal arteries	1 year to less than 2 years	No	Prevention and management	Cohort study	Observational	1994	1999	Equal to or greater than 75%	11	82	51	Haemodialysis	Yes	Combination of participants with and without diabetes	All nine patients with patent grafts had healed open wounds or limited forefoot amputations. Four patients had healed digital amputations, three had healed open wounds, and two patients had healed transmetatarsal amputations. Although multiple foot procedures were occasionally required, healing in all patients was accomplished within 12 weeks of bypass graft construction.	Functional limb salvage was found to be 82% at 3 years		The assisted primary patency rate was found to be 82% at 2 years., After successful bypass grafting, the mean ABI improved from 0.26 to 0.65 and the mean toe pres-sure from 0.13 to 0.37 mm Hg (range, 0.26-0.44mm Hg).			1	1	0	1	0	3
Tsai C-Y, Chu S-Y, Wen Y-W, Hsu L-A, Chen C-C, Peng S-H et al. The value of Doppler waveform analysis in predicting major lower extremity amputation among dialysis patients treated for diabetic foot ulcers. Diabetes Res Clin Pract. 2013;100(2):181-8. doi:10.1016/j.diabres.2013.03.017.	2013	Tsai	The value of Doppler waveform analysis in predicting major lower extremity amputation among dialysis patients treated for diabetic foot ulcers	To examine the predictors for lower extremity amputation (LEA) inpatients with diabetic foot ulcers according to kidney function and, in the case of dialysis patients, specifically evaluate the vasculature with the ankle €“brachial index (ABI) and Doppler waveforms	Taiwan	Inpatient (hospital) setting (other than dialysis)	Care from one or more health professionals	Care under a multidisciplinary team of diabetologists; cardiologists; vascular, plastic, and orthopedic surgeons; nutritionists; and nursing personnel. 29.9% of patients experienced revascularization	Not reported	No	Prevention and management	Cohort study	Observational	2009	2010	Less than 75% (but 10 or more participants had ESRD and results for this specific group are available)	97	52.6	64	Haemodialysis and peritoneal dialysis	No	All had diabetes		33% had no amputation, 32% had minor amputation, 35.1% had major amputaion					0	1	0	0	0	1
Tsur A, Shakeer N, Geron R. Comparison of the functional outcomes of lower limb amputees with or without end-stage renal disease. Isr Med Assoc J. 2019;21(9):585-8.	2019	Tsur	Comparison of the Functional Outcomes of Lower Limb Amputees with or without End-Stage Renal Disease	To evaluate the functional outcomes and survival among amputees treated with hemodialysis at the end of the rehabilitation procedure	Israel	Inpatient (hospital) setting (other than dialysis)	Other	Surgery Involved Lower Limb amputation including above knee and below knee amputee's. Rehabilitation was the next intervention given and finally prothesis were prescribed.	Less than 6 months	No	Management	Cohort study	Observational	2010	2013	Less than 75% (but 10 or more participants had ESRD and results for this specific group are available)	19	48	62.6	Haemodialysis and peritoneal dialysis	No	Combination of participants with and without diabetes		After discharge from rehabilitation, 26% were independent, 26% were partially independent and 47% required complete assistance			Mean duration of rehabilitation after amputation was 24.1 days (+/- 7.7)		0	1	0	0	1	2
Tsuyuki K, Kohno K, Ebine K, Tamura S, Ohzeki Y, Murase T et al. Utility of Exercise-Induced Zero TBI Sign in Patients on Maintenance Hemodialysis. Ann Vasc Dis. 2016;9(3):149-53. doi:10.3400/avd.oa.16-00074.	2016	Tsuyuki	Utility of Exercise-Induced Zero TBI Sign in Patients on Maintenance Hemodialysis	To determine whether exercise-induced zero toe brachial index sign (e-ZETS) is beneficial to prevent advanced perfusion disturbance in maintenance hemodialysis patients	Japan	Outpatient setting (other than dialysis)	Other	Ankle-brachial pressure index (ABI) resting; toe-brachial pressure index (TBI) both resting and after exercise; with zero TBI defined as less than 40mmHg	2 years to less than 5 years	No	Prevention	Cohort study	Observational	2009	2014	Equal to or greater than 75%	156	65	66	Haemodialysis	No	Combination of participants with and without diabetes				Progression to the resting zero toe brachial index sign (r-ZETS) was observed in 8 (36.4%) of the 22 toes in the exercise-induced zero toe brachial, index sign (e-ZETS) group, including 3 (13.6%) with critical, limb ischemia (CLI). In the non-e-ZETS group, 1 (1.6%) of the 63 toes showed progression to the r-ZETS. The r-ZETS avoidance rate significantly differed (p <0.001) between the e-ZETS and n…			0	0	0	1	0	1
Tylicki L, Niew głowski T, Biedunkiewicz B, Burakowski S, Rutkowski B. Beneficial clinical effects of ozonated autohemotherapy in chronically dialysed patients with atherosclerotic ischemia of the lower limbs--pilot study. Int J Artif Organs. 2001;24(2):79-82.	2001	Tylicki	Beneficial clinical effects of ozonated autohemotherapy in chronically dialysed patients with atherosclerotic ischemia of the lower limbs - pilot study	To analyze the influence of blood ozonation (O3 autohaemotherapy-AHT) on the intensity of symptoms of ischemia of the lower limbs among dialyzed patients with chronic renal failure	Poland	Dialysis unit	Other	ozonated autohemotherapy (O3AHT)	Less than 6 months	No	Management	Cohort study	Observational	Not reported	Not reported	Equal to or greater than 75%	12	67	58	Haemodialysis and peritoneal dialysis	No	Presence or absence of diabetes not specified	Researchers observed enhanced healing of foot ulceration after O3AHT in one diabetic patient whose foot was seriously under threat of amputation.			Most patients (11 pts - 91.6%) got better and reported decreasing intensity of ischemic pains or prolongation of CID. Seven patients (58.3%) expressed distinct and very distinct improvement., 3 patients reported the disappearance of rest pains and stopped receiving analgesics. One patient reported a complete disappearance of intermittent claudication. Significant prolongation of intermittent clau…			1	0	0	1	0	2
Urabe G, Yamamoto K, Onozuka A, Miyata T, Nagawa H. Skin Perfusion Pressure is a Useful Tool for Evaluating Outcome of Ischemic Foot Ulcers with Conservative Therapy. Ann Vasc Dis. 2009;2(1):21-6. doi:10.3400/avd.oa08029.	2009	Urabe	Skin Perfusion Pressure is a Useful Tool for Evaluating Outcome of Ischemic Foot Ulcers with Conservative Therapy	Confirm whether skin perfusion pressure (SPP) could predict the out-come of ischemic wound healing	Japan	Not reported	Screening by a health professional	Conservative therapy (no revascularization) and skin perfusion pressure assessment	1 year to less than 2 years	No	Management	Cohort study	Observational	2003	2007	Less than 75% (but 10 or more participants had ESRD and results for this specific group are available)	18	48	63	Haemodialysis	No	Presence or absence of diabetes not specified	4 (17%) ischemic foot ulcers improved, while 19 (83%) had no change or were worse.						1	0	0	0	0	1
Vainieri E, Ahluwalia R, Slim H, Walton D, Manu C, Taori S et al. Outcomes after Emergency Admission with a Diabetic Foot Attack Indicate a High Rate of Healing and Limb Salvage But Increased Mortality: 18-Month Follow-up Study. Exp Clin Endocrinol Diabetes. 2022;130(3):165-71. doi:10.1055/a-1322-4811.	2022	Vainieri	Outcomes after Emergency Admission with a Diabetic Foot Attack Indicate a High Rate of Healing and Limb Salvage But Increased Mortality: 18-Month Follow-up Study	To evaluate and report on outcomes at 18-month follow-up in a consecutive cohort of patients admitted to our hospital with a diabetic foot attack (DFA - diabetic foot infection, presenting with rapidly progressive skin and tissue necrosis, threatening both limb and life)	United Kingdom (England, Scotland, Wales, Northern Ireland)	Inpatient (hospital) setting (other than dialysis)	Other	Evaluation of the patients, assessment of vascular status, use of an empirical, broad-spectrum antibiotic regime followed by prompt surgical debridement to remove all the infected tissues and subsequently targeted antibiotic therapy. Where required, lower limb revascularization was prioritised and soft tissue defects following surgical debridement were managed with negative pressure wound, therap…	1 year to less than 2 years	No	Prevention and management	Cohort study	Observational	2016	2017	Less than 75% (but 10 or more participants had ESRD and results for this specific group are available)	11	48	63	Not reported	No	Presence or absence of diabetes not specified	2 patients (18%) healed, while 2 patients (18%) did not heal.	3 patients (27%) experienced major amputation					1	1	0	0	0	2
Volaco A, Chantelau E, Richter B, Luther B. Outcome of critical foot ischaemia in longstanding diabetic patients: a retrospective cohort study in a specialised tertiary care centre. Vasa. 2004;33(1):36-41. doi:10.1024/0301-1526.33.1.36.	2004	Volaco	Outcome of critical foot ischaemia in longstanding diabetic patients: a retrospective cohort study in a specialised tertiary care centre	To establish risk factors predicting the outcome of foot lesions in longstanding diabetic patients with critical foot ischemia (CFI - tissue loss at the foot plus angiographically proved arterial insufficiency)	Germany	Inpatient (hospital) setting (other than dialysis)	Other	Vascular and peripheral polyneuropathy screening, plain x-ray of the foot; joint care by specialised diabetologists and vascular surgeons; revascularisation if required	6 months to less than 1 year	No	Prevention and management	Cohort study	Observational	1999	2002	Less than 75% (but 10 or more participants had ESRD and results for this specific group are available)	19	48	63	Not reported	No	All had diabetes	15 patients (79%) had a bad outcome (the composite outcome of death, major amputation or non-healing lesion, compared with a good outcome of healing or minor amputation)	15 patients (79%) had a bad outcome (the composite outcome of death, major amputation or non-healing lesion, compared with a good outcome of healing or minor amputation)					1	1	0	0	0	2
Wakeen M, Zimmerman SW. Association between human recombinant EPO and peripheral vascular disease in diabetic patients receiving peritoneal dialysis. Am J Kidney Dis. 1998;32(3):488-93. doi:10.1053/ajkd.1998.v32.pm9740167.	1998	Wakeen	Association Between Human Recombinant EPO and Peripheral Vascular Disease in Diabetic Patients Receiving Peritoneal Dialysis	To study the effects of erythropoietin on peripheral vascular disease in patients receiving peritoneal dialysis	United States of America	Dialysis unit	Medication	Erythropoietin	1 year to less than 2 years	No	Prevention	Cohort study	Observational	1990	1996	Equal to or greater than 75%	85	48	48	Peritoneal dialysis	No	All had diabetes		Patients receiving EPO had a leg amputations per year rate of 0.276 (+/- 0.09) compared with 0.024 (+/- 0.012) for patients not receiving EPO (p = 0.074)., Patients receiving EPO had a shorter, time to their first vascular event (amputation, revascularization, or no intervention when one was recommended by a vascular surgeon), which occurred, within a mean of 13.6 months to their first event,, co…		Erythropoietin (EPO) use was associated with an increased incidence of peripheral vascular disease by uni-variate logistic regression, with a relative risk of 4.53 (95% confidence interval, 1.09, 18.89; P=0.038). When analyzed by Cox proportional hazards model, the relative risk for peripheral vascular disease in the group receiving EPO was13.34 (P=0.01). EPO dose was also a signifi-cant risk fac…	Patients receiving Erythropoietin (EPO) had a mean of 1.16 hospital days/month related to peripheral vascular disease, compared with 0.174 hospital days/month for the group who did not receive EPO (P=0.04).		0	1	0	1	1	3
Wang P, Yang F, Yin J, Zhu H, Zhang M, Liu C. Endovascular treatment of hemodialysis-induced lower limb artery ischemia: retrospective analysis from a single center. Ann Palliat Med. 2021;10(4):4661-9. doi:10.21037/apm-21-648.	2021	Wang	Endovascular treatment of hemodialysis-induced lower limb artery ischemia: retrospective analysis from a single center	Summarize the cases of hemodialysis patients with lower, limb ischemia in our department and attempt to determine, the effectiveness of endovascular therapy (EVT) and the predictors of amputation, and mortality	China	Inpatient (hospital) setting (other than dialysis)	Surgery	Endovascular therapy	1 year to less than 2 years	Yes	Prevention and management	Cohort study	Observational	2015	2018	Equal to or greater than 75%	67	52.2	69.8	Haemodialysis	No	Combination of participants with and without diabetes		18 patients (36.9%) underwent amputation: 14 (38.9%) in the group of patients not receiving endovascular therapy (EVT) and 4 (12.9%) in the group of patients receiving EVT (P 0.017). , The results from the Kaplan-Meier curves indicated that the incidence of amputation was much lower in patients receiving EVT than in those not receiving EVT (P=0.02).		There were 14 patients (45.2%) who received EVT and required further treatment of revascularization.			0	1	0	1	0	2
Wassermann RJ, Saroyan RM, Rice JC, Kerstein MD. Infrainguinal revascularization for limb salvage in patients with end-stage renal disease. South Med J. 1991;84(2):190-2. doi:10.1097/00007611-199102000-00009.	1991	Wassermann	Infrainguinal revascularization for limb salvage in patients with end-stage renal disease	To study the efficacy of infrainguinal bypass for limb salvage in patients with end-stage renal disease (ESRD)	United States of America	Inpatient (hospital) setting (other than dialysis)	Surgery	Infrainguinal bypass	1 year to less than 2 years	No	Prevention and management	Cohort study	Observational	1979	1988	Equal to or greater than 75%	37	62	45	Not reported	No	Presence or absence of diabetes not specified		Limb salvage rate was 78% at 3-months and 78% at 18-months. Success of limb salvage most closely correlated with a preoperative ankle-brachial ratio (ABR) of 0.3 or greater (p < 0.01) and level of bypass above the tibioperoneal trunk (p < 0.01).		Cumulative graft patency rate was 97% at 3-months and 82% at 18-months.			0	1	0	1	0	2
Weis-Müller BT, Römmler V, Lippelt I, Porath M, Godehardt E, Balzer K et al. Critical Chronic Peripheral Arterial Disease: Does Outcome Justify Crural or Pedal Bypass Surgery in Patients With Advanced Age or With Comorbidities? Ann Vasc Surg. 2011;25(6):783-95. doi:10.1016/j.avsg.2011.01.008.	2011	Weis-Muller	Critical Chronic Peripheral Arterial Disease: Does Outcome Justify Crural or Pedal Bypass Surgery in Patients With Advanced Age or With Comorbidities?	To investigate the effect of comorbidity, age, and gender on the outcome after surgical below-knee revascularization for critical chronic limb ischemia	Germany	Inpatient (hospital) setting (other than dialysis)	Surgery	Below-knee bypass surgery	5 years or more	No	Management	Cohort study	Observational	1996	2005	Less than 75% (but 10 or more participants had ESRD and results for this specific group are available)	88	48	63	Not reported	No	Presence or absence of diabetes not specified		Unable to extract data					0	1	0	0	0	1
Werneck CCF, Lindsay TF. Tibial Angioplasty for Limb Salvage in High-Risk Patients and Cost Analysis. Ann Vasc Surg. 2009;23(5):554-9. doi:10.1016/j.avsg.2009.05.007.	2009	Werneck	Tibial Angioplasty for Limb Salvage in High-Risk Patients and Cost Analysis	To evaluate the outcomes of tibial percutaneous transluminal angioplasty (PTA) in patients of Rutherford categories 4 and 5 considered to be at high risk for conventional surgery	Canada	Inpatient (hospital) setting (other than dialysis)	Surgery	Percutaneous transluminal angioplasty	6 months to less than 1 year	No	Prevention and management	Cohort study	Observational	2001	2007	Less than 75% (but 10 or more participants had ESRD and results for this specific group are available)	22	48	63	Haemodialysis	No	Presence or absence of diabetes not specified	6 patients (27%) experienced recurrence of, symptoms (defined as any reopening or worsening, of wounds or occurrence of new ones, recurrence, or worsening of rest pain)	6 patients (27%) experienced amputation		6 patients (27%) experienced recurrence of, symptoms (defined as any reopening or worsening, of wounds or occurrence of new ones, recurrence, or worsening of rest pain)			1	1	0	1	0	3
Wheeler DC, London GM, Parfrey PS, Block GA, Correa‐Rotter R, Dehmel B et al. Effects of Cinacalcet on Atherosclerotic and Nonatherosclerotic Cardiovascular Events in Patients Receiving Hemodialysis: The EValuation Of Cinacalcet HCl Therapy to Lower CardioVascular Events (EVOLVE) Trial. J Am Heart Assoc. 2014;3(6):e001363-n/a. doi:10.1161/JAHA.114.001363.	2014	Wheeler	Effects of Cinacalcet on Atherosclerotic and Nonatherosclerotic Cardiovascular Events in Patients Receiving Hemodialysis: The EValuation Of Cinacalcet HCl Therapy to Lower CardioVascular Events (EVOLVE) Trial	Test the hypothesis that treatment with cinacalcet would reduce the risks of death and nonfatal cardiovascular events among patients with secondary hyperparathyroidism who were undergoing dialysis	Multiple countries	Not reported	Medication	Calcimimetic, cinacalcet: , allosteric modulators of the calcium sensing receptor on the surface of parathyroid cells and cells of numerous other tissues.	2 years to less than 5 years	Yes	Prevention	Randomised controlled trial	Experimental	2006	2008	Equal to or greater than 75%	3883	59.4	54.5	Haemodialysis	No	Combination of participants with and without diabetes		Peripheral vascular event (including nontraumatic amputation) was experienced by 20.1% of patients receiving cinacalcet and 19.7% of patients receiving placebo, with no statistically significant difference.		Peripheral vascular event (including nontraumatic amputation) was experienced by 20.1% of patients receiving cinacalcet and 19.7% of patients receiving placebo, with no statistically significant difference.			0	1	0	1	0	2
Whittemore AD, Donaldson MC, Mannick JA. Infrainguinal reconstruction for patients with chronic renal insufficiency. J Vasc Surg. 1993;17(1):32-41. doi:10.1016/0741-5214(93)90007-9.	1993	Whittemore	Infrainguinal reconstruction for patients with chronic renal insufficiency	The efficacy of autogenous infrainguinal reconstruction for patients with varying degrees of chronic renal insufficiency was reviewed because it has not been well defined	United States of America	Inpatient (hospital) setting (other than dialysis)	Surgery	Infrainguinal reconstruction or primary amputation	5 years or more	No	Prevention and management	Cohort study	Observational	1977	1992	Less than 75% (but 10 or more participants had ESRD and results for this specific group are available)	26	48	63	Haemodialysis	No	Presence or absence of diabetes not specified		The 2-year limb salvage rate after infrainguinal arterial reconstruction was 76%.		Cumulative primary patency associated with autogenous infrainguinal arterial, 22% at 2-years, while secondary patency was 82% at 2-years.			0	1	0	1	0	2
Woelfle KD, Bruijnen H, Loeprecht H. Infrapopliteal arterial occlusive disease in diabetics with critical foot ischaemia: The role of distal-origin bypass grafts. VASA. 2001;30(SUPPL. 58):40-3. doi:https://dx.doi.org/10.1024/0301-1526.30.s58.40.	2001	Woelfle	Infrapopliteal arterial occlusive disease in diabetics with critical foot ischaemia: The role of distal-origin bypass grafts	To describe the 15-year experience with distal origin bypasses to attain limb salvage in diabetics with infrapopliteal arterial occlusive disease	Germany	Inpatient (hospital) setting (other than dialysis)	Surgery	Distal-origin bypasses	5 years or more	No	Prevention and management	Cohort study	Observational	1986	Not reported	Less than 75% (but 10 or more participants had ESRD and results for this specific group are available)	43	48	63	Not reported	No	All had diabetes		The limb salvage at 30 days was 79%, at 1 year was 51% and at 5 years 39%.					0	1	0	0	0	1
Wong KL, Nather A, Chanyarungrojn AP, Shen L, El Ong T, Elangovan RD et al. Clinical outcomes of ray amputation in diabetic foot patients. Ann Acad Med Singapore. 2014;43(8):428-32. doi:10.47102/annals-acadmedsg.V43N8p428.	2014	Wong	Clinical Outcomes of Ray Amputation in Diabetic Foot Patients	To evaluate the factors that would predict a poor outcome following a ray amputation	Singapore	Inpatient (hospital) setting (other than dialysis)	Surgery	Ray amputation	2 years to less than 5 years	No	Prevention and management	Cohort study	Observational	2007	2010	Less than 75% (but 10 or more participants had ESRD and results for this specific group are available)	19	48	63	Not reported	No	All had diabetes		Good outcome (amputation healed and did not develop any complication within a year) was experienced by 8 patients (42%)., Poor Outcome (underwent proximal reamputation within a year, underwent additional ray amputation on the same foot within a year and/or suffered mortality within a year) was experienced by 11 patients (58%).					0	1	0	0	0	1
Wukich DK, Ahn J, Raspovic KM, Gottschalk FA, La Fontaine J, Lavery LA. Comparison of Transtibial Amputations in Diabetic Patients With and Without End-Stage Renal Disease. Foot Ankle Int. 2017;38(4):388-96. doi:10.1177/1071100716688073.	2017	Wukich	Comparison of Transtibial Amputations in Diabetic Patients With and Without End-Stage Renal Disease	To report on a consecutive series of 102 patients with, diabetes mellitus (DM) who underwent transtibial amputation (TTA) for chronic infections and nonreconstructable lower, extremity deformities; and to compare the outcomes of TTA patients with end-stage renal disease on, dialysis (ESRD) to patients without ESRD, and to identify risk factors for mortality after TTA	United States of America	Inpatient (hospital) setting (other than dialysis)	Surgery	Transtibial amputation	2 years to less than 5 years	No	Prevention and management	Cohort study	Observational	2006	2016	Less than 75% (but 10 or more participants had ESRD and results for this specific group are available)	21	76	59	Haemodialysis and peritoneal dialysis	No	All had diabetes		9 patients (43%) were ambulatory postoperatively. 6 patients (29%) experienced residual limb wound healing problems. 1 patient (5%) experienced transfermoral amputation.					0	1	0	0	0	1
Yamamoto S, Hosaka A, Okamoto H, Shigematsu K, Miyata T, Watanabe T. Efficacy of Revascularization for Critical Limb Ischemia in Patients with End-stage Renal Disease. Eur J Vasc Endovasc Surg. 2014;48(3):316-24. doi:10.1016/j.ejvs.2014.05.019.	2014	Yamamoto	Efficacy of Revascularization for Critical Limb Ischemia in Patients with End-stage Renal Disease	Evaluate the outcomes of surgical revascularization for critical limb ischemia in patients with end-stage renal disease (ESRD)	Japan	Inpatient (hospital) setting (other than dialysis)	Surgery	Surgical revascularization (arterial reconstruction or non arterial reconstruction)	2 years to less than 5 years	No	Prevention and management	Cohort study	Observational	2004	2010	Less than 75% (but 10 or more participants had ESRD and results for this specific group are available)	79	80	64.6	Haemodialysis	Yes	Combination of participants with and without diabetes		Among arterial reconstruction patients, limb salvage rate at 2 years was 80.8%, with major amputation for 11 limbs (19.6%). Amputation was due to necrosis progression in 5 of 8 limbs (63%) with occluded grafts, uncontrolled infection in 4 of 48 limbs (8%) or necrosis progression in 2 of 48 limbs (4%) with patent grafts. , Among non arterial reconstruction patients, limb salvage rate at 2 years wa…		Primary graft patency: 77% 1 year, 69.1% 3 years., Secondary graft patency: 86.2% 1 year, 83.5% at 3 years., The 2-year and 5-year reintervention free survival rates were 62.0% and 57.2%, respectively, in the ESRD group. , 1-year and 3-year reintervention rates were 13.9% and 20.0%, respectively, in the ESRD group., After distal bypass surgery, 13 grafts (33%) in the ESRD group were primarily occ…			0	1	0	1	0	2
Yamazaki H, Hayashi H, Kawamura M, Sasaki A, Kondo E, Ito S et al. Validation of the Risk Score of the Mortality and Lower Limb Loss Considering Ambulatory Status after Surgical Revascularization in Maintaining Patients with Dialysis. Ann Vasc Dis. 2017;10(3):192-6. doi:10.3400/avd.oa.17-00063.	2017	Yamazaki	Validation of the Risk Score of the Mortality and Lower Limb Loss Considering Ambulatory Status after Surgical Revascularization in Maintaining Patients with Dialysis	Propose an alternative risk score predicting prognosis of amputation or death for hemodialysis (HD) patients with critical limb ischemia and to investigate the predictive power of this score	Japan	Inpatient (hospital) setting (other than dialysis)	Surgery	Surgical revascularization (SR) of lower limbs	2 years to less than 5 years	No	Prevention and management	Cohort study	Observational	2005	2011	Equal to or greater than 75%	213	71.7	66	Haemodialysis	No	Combination of participants with and without diabetes		20 patients (21 limbs) underwent amputations within 1 year. In multivariable analysis, non-ambulation (HR 2.42, 95%CI 1.30-4.51, p<0.01) and lower geriatric nutritional risk index (HR 1.91, 95%CI 1.08-3.39, p=0.03) were associated with death or amputation. , The overall amputation free survival (AFS) rate was 79.0% (95%CI: 71.8 €“84.8). , Based on the total risk score, patients were divided into …					0	1	0	0	0	1
Yoshikawa H, Kujime S, Iwasaki M, Yoshikawa M. Poor survival of dialysis patients with unhealed wounds because of critical limb ischemia: Limb salvage and survival requires wound healing. Int Wound J. 2019;16(5):1112-8. doi:10.1111/iwj.13162.	2019	Yoshikawa	Poor survival of dialysis patients with unhealed wounds because of critical limb ischemia: Limb salvage and survival requires wound healing	To identify the optimal treatment, including revascularisation and amputation, from the perspective of wound healing by analysing the survival of hemodialysis (HD) patients with critical limb ischemia (CLI) with healed or unhealed wounds of a lower extremity	Japan	Multiple settings	Surgery	A periodic foot check was performed once a month and if patients complained of a foot problem wound generation was recorded. Severity judgment, management, and treatment of a new wound were performed by a foot care team of specialised physicians, nurses, and technologists at our clinic. First, the need for revascularisation by endovasculartreatment (EVT) and bypass surgery was investigated, and i…	1 year to less than 2 years	No	Management	Cohort study	Observational	2004	2016	Equal to or greater than 75%	52	67	68.6	Haemodialysis	No	Combination of participants with and without diabetes	In multivariate regression analysis, Creatinine < 9 mg/dL remained a significant, independent factor associated with an unhealed wound (odds, ratio 5.89, 95% CI: 1.71-22.66, P = 0.0085)						1	0	0	0	0	1
Yuo TH, Wallace JR, Fish L, Avgerinos ED, Leers SA, Al-Khoury GE et al. Editor's Choice – Comparison of Outcomes After Open Surgical and Endovascular Lower Extremity Revascularisation Among End Stage Renal Disease Patients on Dialysis. Eur J Vasc Endovasc Surg. 2019;57(2):248-57. doi:10.1016/j.ejvs.2018.09.008.	2019	Yuo	Editor's Choice - Comparison of Outcomes After Open Surgical and Endovascular Lower Extremity Revascularisation Among End Stage Renal Disease Patients on Dialysis	To characterise the outcomes of endovascular revascularisation (ER) and open surgical revascularisation (OSR) in end stage renal disease (ESRD) patients treated for claudication or critical limb ischaemia (CLI)	United States of America	Inpatient (hospital) setting (other than dialysis)	Surgery	Open surgical revascularisation (OSR) and endovascular revascularisation (ER)	5 years or more	No	Prevention and management	Cohort study	Observational	2005	2011	Equal to or greater than 75%	20347	48	63	Haemodialysis and peritoneal dialysis	No	Combination of participants with and without diabetes		Within 30 days 6.4% of open surgical revascularisation (OSR) patients required major amputation, while 8.8% of endovascular revascularisation (ER) patients required major amputation, p <0.001. , Proportional hazards models demonstrated no difference in long term major amputation risk with open surgical revascularisation (OSR) compared with endovascular revascularisation (ER) (HR, 0.99, 0.93-1.05,…					0	1	0	0	0	1
Zambetti BR, Stiles ZE, Gupta PK, Stickley SM, Brahmbhatt R, Rohrer MJ et al. Analysis of Early Lower Extremity Re-amputation. Ann Vasc Surg. 2022;81:351-7. doi:10.1016/j.avsg.2021.10.030.	2021	Zambetti	Analysis of Early Lower Extremity Re-amputation	To define outcomes and risk factors for re-amputation	United States of America	Inpatient (hospital) setting (other than dialysis)	Surgery	major lower extremity amputation	Less than 6 months	No	Prevention and management	Cohort study	Observational	2012	2016	Less than 75% (but 10 or more participants had ESRD and results for this specific group are available)	2727	48	63	Not reported	No	Presence or absence of diabetes not specified		66 (2%) underwent early re-amputation (within 30 days postoperatively)					0	1	0	0	0	1
Zhang LL, Saldana-Ruiz N, Elsayed RS, Armstrong DG, Shin L, Magee GA et al. Predictors of Major Adverse Limb Events after Open Forefoot Amputation in Patients with Chronic Limb-Threatening Ischemia. Ann Vasc Surg. 2020;66:614-20. doi:10.1016/j.avsg.2020.01.099.	2020	Zhang	Predictors of Major Adverse Limb Events after Open Forefoot Amputation in Patients with Chronic Limb-Threatening Ischemia	To evaluate preoperative risk factors that contributed to durability and efficacy of limb salvage after open trans-metatarsal amputation (TMA) in patients with critical limb-threatening ischemia	United States of America	Inpatient (hospital) setting (other than dialysis)	Surgery	Open transmetatarsal (TMA) amputation	1 year to less than 2 years	No	Prevention and management	Cohort study	Observational	2009	2018	Less than 75% (but 10 or more participants had ESRD and results for this specific group are available)	23	48	63	Not reported	No	Presence or absence of diabetes not specified		4 patient's (17%) transmetatarsal amputations (TMA) did not heal. 11 patients (48%) experienced major adverse limb events (major amputation or additional, revascularization procedures)		11 patients (48%) experienced major adverse limb events (major amputation or additional, revascularization procedures)			0	1	0	1	0	2
